# Supplementary material for: Mucosal microbiome dysbiosis in gastric carcinogenesis
Source: PubMed Central journal article supplement — Gut. 2017 Aug 1;67(6):1024–32. doi: 10.1136/gutjnl-2017-314281 (PMC5969346; doi:10.1136/gutjnl-2017-314281), 2017-08-01
Supplement: gutjnl-2017-314281supp001.pdf [file gutjnl-2017-314281supp001.pdf]

**Supplementary table 1 : Metadata of study subjects**

| Sample_ID  | Fastq_sample_names | Fastq_prefix_names | Cohort | Gender | Age | Age_group | HP_status(sequence)       | Biopsy_site | Diagnosis             |
|------------|--------------------|--------------------|--------|--------|-----|-----------|---------------------------|-------------|-----------------------|
| HK-27-T    | 104HK_2FT.v4       | DMP01783           | Xi'an  | Female | 64  | 3         | <i>H. pylori negative</i> | body        | Intestinal metaplasia |
| 973-2-DI   | 226973_2DT.v4      | DMP01783           | Xi'an  | Female | 48  | 2         | <i>H. pylori negative</i> | fundus      | Atrophic gastritis    |
| HK-34-T    | 29HK_34T.v4        | DMP01783           | Xi'an  | Female | 53  | 2         | <i>H. pylori negative</i> | body        | Superficial gastritis |
| 973-1-Di   | 973_1_Di.v4        | DMP01814           | Xi'an  | Male   | 35  | 1         | <i>H. pylori negative</i> | fundus      | Atrophic gastritis    |
| 973-1-T    | 973_1_T.v4         | DMP01814           | Xi'an  | Male   | 35  | 1         | <i>H. pylori negative</i> | body        | Atrophic gastritis    |
| 973-12-Di  | 973_12_Di.v4       | DMP01813           | Xi'an  | Male   | 46  | 2         | <i>H. pylori positive</i> | fundus      | Superficial gastritis |
| 973-12-Dou | 973_12_Dou.v4      | DMP01813           | Xi'an  | Male   | 46  | 2         | <i>H. pylori positive</i> | antrum      | Superficial gastritis |
| 973-12-T   | 973_12_T.v4        | DMP01813           | Xi'an  | Male   | 46  | 2         | <i>H. pylori positive</i> | body        | Superficial gastritis |
| 973-13-Di  | 973_13_Di.v4       | DMP01813           | Xi'an  | Male   | 32  | 1         | <i>H. pylori positive</i> | fundus      | Superficial gastritis |
| 973-13-Dou | 973_13_Dou.v4      | DMP01813           | Xi'an  | Male   | 32  | 1         | <i>H. pylori positive</i> | antrum      | Superficial gastritis |
| 973-13-T   | 973_13_T.v4        | DMP01813           | Xi'an  | Male   | 32  | 1         | <i>H. pylori negative</i> | body        | Superficial gastritis |
| 973-14-Di  | 973_14_Di.v4       | DMP01813           | Xi'an  | Male   | 50  | 2         | <i>H. pylori positive</i> | fundus      | Superficial gastritis |
| 973-14-Dou | 973_14_Dou.v4      | DMP01813           | Xi'an  | Male   | 50  | 2         | <i>H. pylori positive</i> | antrum      | Superficial gastritis |
| 973-14-T   | 973_14_T.v4        | DMP01813           | Xi'an  | Male   | 50  | 2         | <i>H. pylori positive</i> | body        | Superficial gastritis |
| 973-15-Di  | 973_15_Di.v4       | DMP01813           | Xi'an  | Male   | 32  | 1         | <i>H. pylori positive</i> | fundus      | Atrophic gastritis    |
| 973-15-Dou | 973_15_Dou.v4      | DMP01813           | Xi'an  | Male   | 32  | 1         | <i>H. pylori negative</i> | antrum      | Atrophic gastritis    |
| 973-15-T   | 973_15_T.v4        | DMP01813           | Xi'an  | Male   | 32  | 1         | <i>H. pylori positive</i> | body        | Atrophic gastritis    |
| 973-16-Di  | 973_16_Di.v4       | DMP01813           | Xi'an  | Male   | 52  | 2         | <i>H. pylori positive</i> | fundus      | Atrophic gastritis    |
| 973-16-Dou | 973_16_Dou.v4      | DMP01813           | Xi'an  | Male   | 52  | 2         | <i>H. pylori positive</i> | antrum      | Atrophic gastritis    |
| 973-16-T   | 973_16_T.v4        | DMP01813           | Xi'an  | Male   | 52  | 2         | <i>H. pylori positive</i> | body        | Atrophic gastritis    |
| 973-17-Di  | 973_17_Di.v4       | DMP01813           | Xi'an  | Female | 43  | 2         | <i>H. pylori positive</i> | fundus      | Atrophic gastritis    |
| 973-17-Dou | 973_17_Dou.v4      | DMP01813           | Xi'an  | Female | 43  | 2         | <i>H. pylori positive</i> | antrum      | Atrophic gastritis    |
| 973-17-T   | 973_17_T.v4        | DMP01813           | Xi'an  | Female | 43  | 2         | <i>H. pylori positive</i> | body        | Atrophic gastritis    |
| 973-18-Di  | 973_18_Di.v4       | DMP01833           | Xi'an  | Female | 47  | 2         | <i>H. pylori negative</i> | fundus      | Superficial gastritis |
| 973-18-Dou | 973_18_Dou.v4      | DMP01833           | Xi'an  | Female | 47  | 2         | <i>H. pylori positive</i> | antrum      | Superficial gastritis |
| 973-18-T   | 973_18_T.v4        | DMP01833           | Xi'an  | Female | 47  | 2         | <i>H. pylori positive</i> | body        | Superficial gastritis |
| 973-19-Di  | 973_19_Di.v4       | DMP01833           | Xi'an  | Male   | 62  | 3         | <i>H. pylori negative</i> | fundus      | Atrophic gastritis    |
| 973-19-Dou | 973_19_Dou.v4      | DMP01833           | Xi'an  | Male   | 62  | 3         | <i>H. pylori positive</i> | antrum      | Atrophic gastritis    |
| 973-19-T   | 973_19_T.v4        | DMP01833           | Xi'an  | Male   | 62  | 3         | <i>H. pylori positive</i> | body        | Atrophic gastritis    |
| 973-2-DOU  | 973_2_DOU.v4       | DMP01814           | Xi'an  | Female | 48  | 2         | <i>H. pylori negative</i> | antrum      | Atrophic gastritis    |
| 973-2-T    | 973_2_T.v4         | DMP01814           | Xi'an  | Female | 48  | 2         | <i>H. pylori positive</i> | body        | Atrophic gastritis    |
| 973-20-Di  | 973_20_Di.v4       | DMP01833           | Xi'an  | Female | 42  | 2         | <i>H. pylori positive</i> | fundus      | Atrophic gastritis    |
| 973-20-Dou | 973_20_Dou.v4      | DMP01833           | Xi'an  | Female | 42  | 2         | <i>H. pylori positive</i> | antrum      | Atrophic gastritis    |
| 973-20-T   | 973_20_T.v4        | DMP01833           | Xi'an  | Female | 42  | 2         | <i>H. pylori positive</i> | body        | Atrophic gastritis    |
| 973-21-Di  | 973_21_Di.v4       | DMP01833           | Xi'an  | Female | 47  | 2         | <i>H. pylori negative</i> | fundus      | Superficial gastritis |
| 973-21-Dou | 973_21_Dou.v4      | DMP01833           | Xi'an  | Female | 47  | 2         | <i>H. pylori positive</i> | antrum      | Superficial gastritis |
| 973-21-T   | 973_21_T.v4        | DMP02041_DMP01833  | Xi'an  | Female | 47  | 2         | <i>H. pylori negative</i> | body        | Superficial gastritis |
| 973-22-Di  | 973_22_Di.v4       | DMP01833           | Xi'an  | Male   | 33  | 1         | <i>H. pylori positive</i> | fundus      | Superficial gastritis |
| 973-22-T   | 973_22_T.v4        | DMP01833           | Xi'an  | Male   | 33  | 1         | <i>H. pylori positive</i> | body        | Superficial gastritis |
| 973-23-Di  | 973_23_Di.v4       | DMP01814           | Xi'an  | Female | 53  | 2         | <i>H. pylori positive</i> | fundus      | Superficial gastritis |
| 973-23-Dou | 973_23_Dou.v4      | DMP01814           | Xi'an  | Female | 53  | 2         | <i>H. pylori positive</i> | antrum      | Superficial gastritis |
| 973-23-T   | 973_23T224.v4      | DMP01783           | Xi'an  | Female | 53  | 2         | <i>H. pylori positive</i> | body        | Superficial gastritis |
| 973-4-Di   | 973_4_Di.v4        | DMP01813           | Xi'an  | Female | 29  | 1         | <i>H. pylori positive</i> | fundus      | Superficial gastritis |
| 973-4-Dou  | 973_4_Dou.v4       | DMP01813           | Xi'an  | Female | 29  | 1         | <i>H. pylori positive</i> | antrum      | Superficial gastritis |
| 973-4-T    | 973_4_T.v4         | DMP01813           | Xi'an  | Female | 29  | 1         | <i>H. pylori negative</i> | body        | Superficial gastritis |
| 973-5-DI   | 973_5_DI.v4        | DMP01814           | Xi'an  | Male   | 43  | 2         | <i>H. pylori negative</i> | fundus      | Atrophic gastritis    |
| 973-5-Dou  | 973_5_Dou.v4       | DMP01814           | Xi'an  | Male   | 43  | 2         | <i>H. pylori positive</i> | antrum      | Atrophic gastritis    |
| 973-5-T    | 973_5_T.v4         | DMP01814           | Xi'an  | Male   | 43  | 2         | <i>H. pylori positive</i> | body        | Atrophic gastritis    |
| 973-6-Di   | 973_6_Di.v4        | DMP01813           | Xi'an  | Female | 41  | 2         | <i>H. pylori positive</i> | fundus      | Atrophic gastritis    |
| 973-6-Dou  | 973_6_Dou.v4       | DMP01813           | Xi'an  | Female | 41  | 2         | <i>H. pylori positive</i> | antrum      | Atrophic gastritis    |
| 973-6-T    | 973_6_T.v4         | DMP01813           | Xi'an  | Female | 41  | 2         | <i>H. pylori negative</i> | body        | Atrophic gastritis    |
| 973-7-Di   | 973_7_Di.v4        | DMP01813           | Xi'an  | Female | 31  | 1         | <i>H. pylori positive</i> | fundus      | Atrophic gastritis    |
| 973-7-Dou  | 973_7_Dou.v4       | DMP01813           | Xi'an  | Female | 31  | 1         | <i>H. pylori negative</i> | antrum      | Atrophic gastritis    |
| 973-7-T    | 973_7_T.v4         | DMP01813           | Xi'an  | Female | 31  | 1         | <i>H. pylori positive</i> | body        | Atrophic gastritis    |
| 973-9-DI   | 973_9_DI.v4        | DMP01814           | Xi'an  | Female | 45  | 2         | <i>H. pylori positive</i> | fundus      | Atrophic gastritis    |
| 973-9-DOU  | 973_9_DOU.v4       | DMP01814           | Xi'an  | Female | 45  | 2         | <i>H. pylori positive</i> | antrum      | Atrophic gastritis    |
| 973-9-T    | 973_9_T.v4         | DMP01814           | Xi'an  | Female | 45  | 2         | <i>H. pylori positive</i> | body        | Atrophic gastritis    |
| HK-9-T     | 97HK_9T.v4         | DMP01783           | Xi'an  | Male   | 50  | 2         | <i>H. pylori negative</i> | body        | Atrophic gastritis    |
| HK-1-Dou   | HK_1_Dou.v4        | DMP01813           | Xi'an  | Male   | 62  | 3         | <i>H. pylori negative</i> | antrum      | Atrophic gastritis    |
| HK-1-T     | HK_1_T.v4          | DMP01813           | Xi'an  | Male   | 62  | 3         | <i>H. pylori positive</i> | body        | Atrophic gastritis    |
| HK-10-Di   | HK_10_Di.v4        | DMP01814           | Xi'an  | Female | 40  | 1         | <i>H. pylori positive</i> | fundus      | Superficial gastritis |
| HK-10-Dou  | HK_10_Dou.v4       | DMP01813           | Xi'an  | Female | 40  | 1         | <i>H. pylori positive</i> | antrum      | Superficial gastritis |
| HK-10-T    | HK_10_T.v4         | DMP01813           | Xi'an  | Female | 40  | 1         | <i>H. pylori positive</i> | body        | Superficial gastritis |
| HK-11-DI   | HK_11_DI.v4        | DMP01814           | Xi'an  | Female | 32  | 1         | <i>H. pylori negative</i> | fundus      | Intestinal metaplasia |
| HK-11-T    | HK_11_T.v4         | DMP02041_DMP01814  | Xi'an  | Female | 32  | 1         | <i>H. pylori negative</i> | body        | Intestinal metaplasia |
| HK-13-T    | HK_13_T.v4         | DMP01814           | Xi'an  | Male   | 57  | 2         | <i>H. pylori positive</i> | body        | Superficial gastritis |

|           |               |                                 |       |        |    |   |                           |        |                       |
|-----------|---------------|---------------------------------|-------|--------|----|---|---------------------------|--------|-----------------------|
| HK-14-Di  | HK_14_Di.v4   | DMP01814                        | Xi'an | Male   | 66 | 3 | <i>H. pylori negative</i> | fundus | Atrophic gastritis    |
| HK-15-Dou | HK_15_Dou.v4  | DMP01814                        | Xi'an | Female | 55 | 2 | <i>H. pylori negative</i> | antrum | Atrophic gastritis    |
| HK-15-T   | HK_15_T.v4    | DMP02041_DMP01814_DMP01814_2204 | Xi'an | Female | 55 | 2 | <i>H. pylori negative</i> | body   | Atrophic gastritis    |
| HK-16-Di  | HK_16_Di.v4   | DMP01814                        | Xi'an | Female | 45 | 2 | <i>H. pylori negative</i> | fundus | Intestinal metaplasia |
| HK-16-DOU | HK_16_DOU.v4  | DMP01814                        | Xi'an | Female | 45 | 2 | <i>H. pylori positive</i> | antrum | Intestinal metaplasia |
| HK-16-T   | HK_16_T.v4    | DMP01814                        | Xi'an | Female | 45 | 2 | <i>H. pylori negative</i> | body   | Intestinal metaplasia |
| HK-17-Di  | HK_17_Di.v4   | DMP01814                        | Xi'an | Female | 43 | 2 | <i>H. pylori positive</i> | fundus | Atrophic gastritis    |
| HK-17-Dou | HK_17_Dou.v4  | DMP01814                        | Xi'an | Female | 43 | 2 | <i>H. pylori negative</i> | antrum | Atrophic gastritis    |
| HK-17-T   | HK_17_T.v4    | DMP01814                        | Xi'an | Female | 43 | 2 | <i>H. pylori negative</i> | body   | Atrophic gastritis    |
| HK-19-Di  | HK_19_Di.v4   | DMP01813                        | Xi'an | Female | 46 | 2 | <i>H. pylori positive</i> | fundus | Superficial gastritis |
| HK-19-Dou | HK_19_Dou.v4  | DMP01813                        | Xi'an | Female | 46 | 2 | <i>H. pylori positive</i> | antrum | Superficial gastritis |
| HK-19-T   | HK_19_T.v4    | DMP01813                        | Xi'an | Female | 46 | 2 | <i>H. pylori positive</i> | body   | Superficial gastritis |
| HK-2-Di   | HK_2_Di.v4    | DMP01814                        | Xi'an | Female | 60 | 3 | <i>H. pylori positive</i> | fundus | Superficial gastritis |
| HK-2-T    | HK_2_T.v4     | DMP01814                        | Xi'an | Female | 60 | 3 | <i>H. pylori positive</i> | body   | Superficial gastritis |
| HK-20-Di  | HK_20_Di.v4   | DMP01813                        | Xi'an | Female | 48 | 2 | <i>H. pylori positive</i> | fundus | Atrophic gastritis    |
| HK-20-Dou | HK_20_Dou.v4  | DMP01813                        | Xi'an | Female | 48 | 2 | <i>H. pylori positive</i> | antrum | Atrophic gastritis    |
| HK-20-T   | HK_20_T.v4    | DMP01813                        | Xi'an | Female | 48 | 2 | <i>H. pylori positive</i> | body   | Atrophic gastritis    |
| HK-21-Dou | HK_21_Dou.v4  | DMP01814                        | Xi'an | Male   | 64 | 3 | <i>H. pylori positive</i> | antrum | Superficial gastritis |
| HK-21-T   | HK_21_T.v4    | DMP01814                        | Xi'an | Male   | 64 | 3 | <i>H. pylori positive</i> | body   | Superficial gastritis |
| HK-21-Di  | HK_21DT202.v4 | DMP01783                        | Xi'an | Male   | 64 | 3 | <i>H. pylori negative</i> | fundus | Superficial gastritis |
| HK-22-Di  | HK_22_Di.v4   | DMP01813                        | Xi'an | Male   | 59 | 2 | <i>H. pylori positive</i> | fundus | Superficial gastritis |
| HK-22-Dou | HK_22_Dou.v4  | DMP01813                        | Xi'an | Male   | 59 | 2 | <i>H. pylori positive</i> | antrum | Superficial gastritis |
| HK-22-T   | HK_22_T.v4    | DMP01814                        | Xi'an | Male   | 59 | 2 | <i>H. pylori negative</i> | body   | Superficial gastritis |
| HK-23-Di  | HK_23_Di.v4   | DMP02043_DMP01814               | Xi'an | Female | 41 | 2 | <i>H. pylori negative</i> | fundus | Intestinal metaplasia |
| HK-23-Dou | HK_23_Dou.v4  | DMP01814                        | Xi'an | Female | 41 | 2 | <i>H. pylori negative</i> | antrum | Intestinal metaplasia |
| HK-23-T   | HK_23_T.v4    | DMP01814                        | Xi'an | Female | 41 | 2 | <i>H. pylori positive</i> | body   | Intestinal metaplasia |
| HK-24-Di  | HK_24_Di.v4   | DMP01814                        | Xi'an | Male   | 69 | 3 | <i>H. pylori negative</i> | fundus | Intestinal metaplasia |
| HK-24-Dou | HK_24_Dou.v4  | DMP01814                        | Xi'an | Male   | 69 | 3 | <i>H. pylori negative</i> | antrum | Intestinal metaplasia |
| HK-24-T   | HK_24_T.v4    | DMP01814                        | Xi'an | Male   | 69 | 3 | <i>H. pylori positive</i> | body   | Intestinal metaplasia |
| HK-26-Di  | HK_26_Di.v4   | DMP01813                        | Xi'an | Female | 53 | 2 | <i>H. pylori positive</i> | fundus | Intestinal metaplasia |
| HK-26-Dou | HK_26_Dou.v4  | DMP01813                        | Xi'an | Female | 53 | 2 | <i>H. pylori positive</i> | antrum | Intestinal metaplasia |
| HK-26-T   | HK_26T.v4     | DMP01783                        | Xi'an | Female | 53 | 2 | <i>H. pylori negative</i> | body   | Intestinal metaplasia |
| HK-27-Di  | HK_27_Di.v4   | DMP01813                        | Xi'an | Female | 64 | 3 | <i>H. pylori positive</i> | fundus | Intestinal metaplasia |
| HK-27-Dou | HK_27_Dou.v4  | DMP01813                        | Xi'an | Female | 64 | 3 | <i>H. pylori positive</i> | antrum | Intestinal metaplasia |
| HK-28-Di  | HK_28_Di.v4   | DMP01813                        | Xi'an | Male   | 60 | 3 | <i>H. pylori positive</i> | fundus | Atrophic gastritis    |
| HK-28-T   | HK_28_T.v4    | DMP01813                        | Xi'an | Male   | 60 | 3 | <i>H. pylori positive</i> | body   | Atrophic gastritis    |
| HK-28-Dou | HK_28Dou.v4   | DMP01783                        | Xi'an | Male   | 60 | 3 | <i>H. pylori negative</i> | antrum | Atrophic gastritis    |
| HK-29-Di  | HK_29_Di.v4   | DMP01814                        | Xi'an | Female | 54 | 2 | <i>H. pylori positive</i> | fundus | Superficial gastritis |
| HK-29-Dou | HK_29_Dou.v4  | DMP01814                        | Xi'an | Female | 54 | 2 | <i>H. pylori positive</i> | antrum | Superficial gastritis |
| HK-29-T   | HK_29_T.v4    | DMP01814                        | Xi'an | Female | 54 | 2 | <i>H. pylori positive</i> | body   | Superficial gastritis |
| HK-3-Di   | HK_3_Di.v4    | DMP01833                        | Xi'an | Male   | 64 | 3 | <i>H. pylori positive</i> | fundus | Intestinal metaplasia |
| HK-3-Dou  | HK_3_Dou.v4   | DMP01833                        | Xi'an | Male   | 64 | 3 | <i>H. pylori positive</i> | antrum | Intestinal metaplasia |
| HK-3-T    | HK_3_T.v4     | DMP01833                        | Xi'an | Male   | 64 | 3 | <i>H. pylori positive</i> | body   | Intestinal metaplasia |
| HK-30-Di  | HK_30_Di.v4   | DMP01813                        | Xi'an | Female | 57 | 2 | <i>H. pylori positive</i> | fundus | Intestinal metaplasia |
| HK-30-T   | HK_30_T.v4    | DMP01813                        | Xi'an | Female | 57 | 2 | <i>H. pylori negative</i> | body   | Intestinal metaplasia |
| HK-31-Di  | HK_31_Di.v4   | DMP01833                        | Xi'an | Female | 55 | 2 | <i>H. pylori positive</i> | fundus | Atrophic gastritis    |
| HK-31-Dou | HK_31_Dou.v4  | DMP01833                        | Xi'an | Female | 55 | 2 | <i>H. pylori positive</i> | antrum | Atrophic gastritis    |
| HK-31-T   | HK_31_T.v4    | DMP01833                        | Xi'an | Female | 55 | 2 | <i>H. pylori positive</i> | body   | Atrophic gastritis    |
| HK-32-Di  | HK_32_Di.v4   | DMP01813                        | Xi'an | Female | 59 | 2 | <i>H. pylori negative</i> | fundus | Intestinal metaplasia |
| HK-32-Dou | HK_32_Dou.v4  | DMP01813                        | Xi'an | Female | 59 | 2 | <i>H. pylori positive</i> | antrum | Intestinal metaplasia |
| HK-32-T   | HK_32_T.v4    | DMP01813                        | Xi'an | Female | 59 | 2 | <i>H. pylori positive</i> | body   | Intestinal metaplasia |
| HK-33-Di  | HK_33_Di.v4   | DMP01833                        | Xi'an | Female | 53 | 2 | <i>H. pylori positive</i> | fundus | Atrophic gastritis    |
| HK-33-Dou | HK_33_Dou.v4  | DMP01833                        | Xi'an | Female | 53 | 2 | <i>H. pylori positive</i> | antrum | Atrophic gastritis    |
| HK-33-T   | HK_33_T.v4    | DMP01833                        | Xi'an | Female | 53 | 2 | <i>H. pylori positive</i> | body   | Atrophic gastritis    |
| HK-34-Di  | HK_34_Di.v4   | DMP01833                        | Xi'an | Female | 53 | 2 | <i>H. pylori negative</i> | fundus | Superficial gastritis |
| HK-34-Dou | HK_34_Dou.v4  | DMP01833                        | Xi'an | Female | 53 | 2 | <i>H. pylori positive</i> | antrum | Superficial gastritis |
| HK-35-Di  | HK_35_Di.v4   | DMP01833                        | Xi'an | Male   | 56 | 2 | <i>H. pylori negative</i> | fundus | Intestinal metaplasia |
| HK-35-Dou | HK_35_Dou.v4  | DMP01833                        | Xi'an | Male   | 56 | 2 | <i>H. pylori negative</i> | antrum | Intestinal metaplasia |
| HK-36-Di  | HK_36_Di.v4   | DMP01833                        | Xi'an | Female | 49 | 2 | <i>H. pylori negative</i> | fundus | Atrophic gastritis    |
| HK-36-Dou | HK_36_Dou.v4  | DMP01833                        | Xi'an | Female | 49 | 2 | <i>H. pylori negative</i> | antrum | Atrophic gastritis    |
| HK-36-T   | HK_36_T.v4    | DMP01833                        | Xi'an | Female | 49 | 2 | <i>H. pylori positive</i> | body   | Atrophic gastritis    |
| HK-37-Di  | HK_37_Di.v4   | DMP01833                        | Xi'an | Male   | 48 | 2 | <i>H. pylori positive</i> | fundus | Intestinal metaplasia |
| HK-37-Dou | HK_37_Dou.v4  | DMP01833                        | Xi'an | Male   | 48 | 2 | <i>H. pylori positive</i> | antrum | Intestinal metaplasia |
| HK-37-T   | HK_37_T.v4    | DMP01833                        | Xi'an | Male   | 48 | 2 | <i>H. pylori positive</i> | body   | Intestinal metaplasia |
| HK-38-Di  | HK_38_Di.v4   | DMP01833                        | Xi'an | Male   | 58 | 2 | <i>H. pylori negative</i> | fundus | Superficial gastritis |
| HK-38-Dou | HK_38_Dou.v4  | DMP01833                        | Xi'an | Male   | 58 | 2 | <i>H. pylori negative</i> | antrum | Superficial gastritis |
| HK-4-Di   | HK_4_Di.v4    | DMP01833                        | Xi'an | Female | 71 | 3 | <i>H. pylori positive</i> | fundus | Atrophic gastritis    |

|           |               |                                 |       |        |    |   |                           |        |                           |
|-----------|---------------|---------------------------------|-------|--------|----|---|---------------------------|--------|---------------------------|
| HK-4-Dou  | HK_4_Dou.v4   | DMP01833                        | Xi'an | Female | 71 | 3 | <i>H. pylori positive</i> | antrum | Atrophic gastritis        |
| HK-4-T    | HK_4_T.v4     | DMP01833                        | Xi'an | Female | 71 | 3 | <i>H. pylori positive</i> | body   | Atrophic gastritis        |
| HK-5-Di   | HK_5_Di.v4    | DMP01833                        | Xi'an | Female | 63 | 3 | <i>H. pylori positive</i> | fundus | Intestinal metaplasia     |
| HK-5-Dou  | HK_5_Dou.v4   | DMP01833                        | Xi'an | Female | 63 | 3 | <i>H. pylori positive</i> | antrum | Intestinal metaplasia     |
| HK-5-T    | HK_5_T.v4     | DMP01833                        | Xi'an | Female | 63 | 3 | <i>H. pylori positive</i> | body   | Intestinal metaplasia     |
| HK-6-Di   | HK_6_Di.v4    | DMP01833                        | Xi'an | Female | 42 | 2 | <i>H. pylori positive</i> | fundus | Intestinal metaplasia     |
| HK-6-Dou  | HK_6_Dou.v4   | DMP01833                        | Xi'an | Female | 42 | 2 | <i>H. pylori positive</i> | antrum | Intestinal metaplasia     |
| HK-6-T    | HK_6_T.v4     | DMP01833                        | Xi'an | Female | 42 | 2 | <i>H. pylori positive</i> | body   | Intestinal metaplasia     |
| HK-7-Di   | HK_7_Di.v4    | DMP01833                        | Xi'an | Male   | 42 | 2 | <i>H. pylori positive</i> | fundus | Superficial gastritis     |
| HK-7-Dou  | HK_7_Dou.v4   | DMP01833                        | Xi'an | Male   | 42 | 2 | <i>H. pylori positive</i> | antrum | Superficial gastritis     |
| HK-7-T    | HK_7_T.v4     | DMP01833                        | Xi'an | Male   | 42 | 2 | <i>H. pylori positive</i> | body   | Superficial gastritis     |
| HK-8-Di   | HK_8_Di.v4    | DMP01833                        | Xi'an | Female | 60 | 3 | <i>H. pylori positive</i> | fundus | Intestinal metaplasia     |
| HK-8-Dou  | HK_8_Dou.v4   | DMP01833                        | Xi'an | Female | 60 | 3 | <i>H. pylori positive</i> | antrum | Intestinal metaplasia     |
| HK-8-T    | HK_8_T.v4     | DMP01833                        | Xi'an | Female | 60 | 3 | <i>H. pylori positive</i> | body   | Intestinal metaplasia     |
| HK-9-Di   | HK_9_Di.v4    | DMP01813                        | Xi'an | Male   | 50 | 2 | <i>H. pylori positive</i> | fundus | Atrophic gastritis        |
| HK-9-Dou  | HK_9_Dou.v4   | DMP01833                        | Xi'an | Male   | 50 | 2 | <i>H. pylori positive</i> | antrum | Atrophic gastritis        |
| HK-12-T   | HK12T244.v4   | DMP01900                        | Xi'an | Male   | 66 | 3 | <i>H. pylori negative</i> | body   | Superficial gastritis     |
| HK-14-DOU | HK14Dou246.v4 | DMP01783                        | Xi'an | Male   | 66 | 3 | <i>H. pylori negative</i> | antrum | Atrophic gastritis        |
| HK-14-T   | HK14T247.v4   | DMP01783                        | Xi'an | Male   | 66 | 3 | <i>H. pylori negative</i> | body   | Atrophic gastritis        |
| HK-15-Di  | HK15DT248.v4  | DMP01900                        | Xi'an | Female | 55 | 2 | <i>H. pylori negative</i> | fundus | Atrophic gastritis        |
| HK-25-Dou | HK25Dou200.v4 | DMP01783                        | Xi'an | Male   | 46 | 2 | <i>H. pylori negative</i> | antrum | Intestinal metaplasia     |
| HK-25-Di  | HK25DT199.v4  | DMP01783                        | Xi'an | Male   | 46 | 2 | <i>H. pylori negative</i> | fundus | Intestinal metaplasia     |
| HK-25-T   | HK25T198.v4   | DMP01783                        | Xi'an | Male   | 46 | 2 | <i>H. pylori negative</i> | body   | Intestinal metaplasia     |
| HK-35-T   | HK35T.v4      | DMP01783                        | Xi'an | Male   | 56 | 2 | <i>H. pylori negative</i> | body   | Intestinal metaplasia     |
| YJ-Ca-10  | YJ_Ca_10.v4   | DMP01814                        | Xi'an | Male   | 72 | 3 | <i>H. pylori negative</i> | body   | Gastric cancer            |
| YJ-CA-12  | YJ_CA_12.v4   | DMP01814                        | Xi'an | Male   | 45 | 2 | <i>H. pylori negative</i> | fundus | Gastric cancer            |
| YJ-Ca-13  | YJ_Ca_13.v4   | DMP01813                        | Xi'an | Female | 46 | 2 | <i>H. pylori positive</i> | body   | Gastric cancer            |
| YJ-Ca-14  | YJ_Ca_14.v4   | DMP01813                        | Xi'an | Male   | 61 | 3 | <i>H. pylori positive</i> | antrum | Gastric cancer            |
| YJ-Ca-15  | YJ_Ca_15.v4   | DMP01813                        | Xi'an | Male   | 61 | 3 | <i>H. pylori positive</i> | body   | Superficial gastritis     |
| YJ-Ca-16  | YJ_Ca_16.v4   | DMP01813                        | Xi'an | Male   | 58 | 2 | <i>H. pylori positive</i> | body   | Gastric cancer            |
| YJ-Ca-17  | YJ_Ca_17.v4   | DMP01813                        | Xi'an | Female | 70 | 3 | <i>H. pylori positive</i> | antrum | Intestinal metaplasia     |
| YJ-Ca-18  | YJ_Ca_18.v4   | DMP01813                        | Xi'an | Male   | 61 | 3 | <i>H. pylori positive</i> | cardia | Gastric cancer            |
| YJ-Ca-19  | YJ_Ca_19.v4   | DMP01833                        | Xi'an | Male   | 57 | 2 | <i>H. pylori positive</i> | body   | Superficial gastritis     |
| YJ-Ca-20  | YJ_Ca_20.v4   | DMP01833                        | Xi'an | Male   | 54 | 2 | <i>H. pylori positive</i> | antrum | Atrophic gastritis        |
| YJ-Ca-22  | YJ_Ca_22.v4   | DMP01813                        | Xi'an | Female | 71 | 3 | <i>H. pylori positive</i> | antrum | Gastric cancer            |
| YJ-Ca-23  | YJ_Ca_23.v4   | DMP01813                        | Xi'an | Female | 48 | 2 | <i>H. pylori positive</i> | antrum | Gastric cancer            |
| YJ-Ca-24  | YJ_Ca_24.v4   | DMP01813                        | Xi'an | Male   | 62 | 3 | <i>H. pylori positive</i> | cardia | Gastric cancer            |
| YJ-Ca-25  | YJ_Ca_25.v4   | DMP01813                        | Xi'an | Male   | 62 | 3 | <i>H. pylori positive</i> | cardia | Gastric cancer            |
| YJ-Ca-7   | YJ_Ca_7.v4    | DMP01814                        | Xi'an | Male   | 44 | 2 | <i>H. pylori negative</i> | body   | Gastric cancer            |
| YJ-ca-8   | YJ_ca_8.v4    | DMP01814                        | Xi'an | Male   | 75 | 3 | <i>H. pylori negative</i> | antrum | Gastric cancer            |
| YJ-Ca-9   | YJ_Ca_9.v4    | DMP01814                        | Xi'an | Male   | 60 | 3 | <i>H. pylori negative</i> | cardia | Gastric cancer            |
| YJ-Ca2    | YJ_Ca2.v4     | DMP01833                        | Xi'an | Male   | 57 | 2 | <i>H. pylori positive</i> | body   | Gastric cancer            |
| YJ-ca21   | YJ_ca21.v4    | DMP01833                        | Xi'an | Female | 34 | 1 | <i>H. pylori positive</i> | antrum | Gastric cancer            |
| YJ-Ca3    | YJ_Ca3.v4     | DMP01833                        | Xi'an | Male   | 52 | 2 | <i>H. pylori positive</i> | cardia | Gastric cancer            |
| YJ-Ca4    | YJ_Ca4.v4     | DMP01833                        | Xi'an | Male   | 63 | 3 | <i>H. pylori positive</i> | cardia | Gastric cancer            |
| YJ-Ca5    | YJ_Ca5.v4     | DMP01833                        | Xi'an | Male   | 57 | 2 | <i>H. pylori positive</i> | body   | Gastric cancer            |
| YJ-Ca6    | YJ_Ca6.v4     | DMP01833                        | Xi'an | Male   | 72 | 3 | <i>H. pylori negative</i> | antrum | Gastric cancer            |
| YJ-N-10   | YJ_N_10.v4    | DMP01814                        | Xi'an | Male   | 72 | 3 | <i>H. pylori negative</i> | body   | Carcinoma_adjacent normal |
| YJ-N-11   | YJ_N_11.v4    | DMP01814                        | Xi'an | Male   | 61 | 3 | <i>H. pylori positive</i> | fundus | Carcinoma_adjacent normal |
| YJ-N-12   | YJ_N_12.v4    | DMP02041_DMP01814_DMP01814_2204 | Xi'an | Male   | 45 | 2 | <i>H. pylori negative</i> | fundus | Carcinoma_adjacent normal |
| YJ-N-13   | YJ_N_13.v4    | DMP01813                        | Xi'an | Female | 46 | 2 | <i>H. pylori positive</i> | body   | Carcinoma_adjacent normal |
| YJ-N-14   | YJ_N_14.v4    | DMP01813                        | Xi'an | Male   | 61 | 3 | <i>H. pylori positive</i> | antrum | Carcinoma_adjacent normal |
| YJ-N-15   | YJ_N_15.v4    | DMP01813                        | Xi'an | Male   | 61 | 3 | <i>H. pylori positive</i> | body   | Superficial gastritis     |
| YJ-N-16   | YJ_N_16.v4    | DMP01813                        | Xi'an | Male   | 58 | 2 | <i>H. pylori positive</i> | body   | Carcinoma_adjacent normal |
| YJ-N-17   | YJ_N_17.v4    | DMP01813                        | Xi'an | Female | 70 | 3 | <i>H. pylori positive</i> | antrum | Intestinal metaplasia     |
| YJ-N-18   | YJ_N_18.v4    | DMP01813                        | Xi'an | Male   | 61 | 3 | <i>H. pylori positive</i> | cardia | Carcinoma_adjacent normal |
| YJ-N-19   | YJ_N_19.v4    | DMP01833                        | Xi'an | Male   | 57 | 2 | <i>H. pylori positive</i> | body   | Superficial gastritis     |
| YJ-N-20   | YJ_N_20.v4    | DMP01833                        | Xi'an | Male   | 54 | 2 | <i>H. pylori positive</i> | antrum | Atrophic gastritis        |
| YJ-N-21   | YJ_N_21.v4    | DMP01833                        | Xi'an | Female | 34 | 1 | <i>H. pylori positive</i> | antrum | Carcinoma_adjacent normal |
| YJ-N-22   | YJ_N_22.v4    | DMP01813                        | Xi'an | Female | 71 | 3 | <i>H. pylori positive</i> | antrum | Carcinoma_adjacent normal |
| YJ-N-23   | YJ_N_23.v4    | DMP01813                        | Xi'an | Female | 48 | 2 | <i>H. pylori positive</i> | antrum | Carcinoma_adjacent normal |
| YJ-N-24   | YJ_N_24.v4    | DMP01813                        | Xi'an | Male   | 62 | 3 | <i>H. pylori positive</i> | cardia | Carcinoma_adjacent normal |
| YJ-N-25   | YJ_N_25.v4    | DMP01813                        | Xi'an | Male   | 62 | 3 | <i>H. pylori positive</i> | cardia | Carcinoma_adjacent normal |
| YJ-N-8    | YJ_N_8.v4     | DMP02041_DMP01814_DMP01814_2204 | Xi'an | Male   | 75 | 3 | <i>H. pylori negative</i> | antrum | Carcinoma_adjacent normal |
| YJ-N-9    | YJ_N_9.v4     | DMP01814                        | Xi'an | Male   | 60 | 3 | <i>H. pylori negative</i> | cardia | Carcinoma_adjacent normal |
| YJ-N2     | YJ_N2.v4      | DMP01833                        | Xi'an | Male   | 57 | 2 | <i>H. pylori negative</i> | body   | Carcinoma_adjacent normal |
| YJ-N3     | YJ_N3.v4      | DMP01833                        | Xi'an | Male   | 52 | 2 | <i>H. pylori positive</i> | cardia | Carcinoma_adjacent normal |

|          |              |                   |                |        |    |    |                           |        |                           |
|----------|--------------|-------------------|----------------|--------|----|----|---------------------------|--------|---------------------------|
| YJ-N4    | YJ_N4.v4     | DMP01833          | Xi'an          | Male   | 63 | 3  | <i>H. pylori positive</i> | cardia | Carcinoma_adjacent normal |
| YJ-N5    | YJ_N5.v4     | DMP01833          | Xi'an          | Male   | 57 | 2  | <i>H. pylori positive</i> | body   | Carcinoma_adjacent normal |
| YJ-N6    | YJ_N6.v4     | DMP01833          | Xi'an          | Male   | 72 | 3  | <i>H. pylori positive</i> | antrum | Carcinoma_adjacent normal |
| YJ-N7    | YJ_N7.v4     | DMP01814          | Xi'an          | Male   | 44 | 2  | <i>H. pylori positive</i> | body   | Carcinoma_adjacent normal |
| YJ-CA-11 | YJCall265.v4 | DMP01783          | Xi'an          | Male   | 61 | 3  | <i>H. pylori negative</i> | fundus | Gastric cancer            |
| 10GC     | 10GC.v4      | DMP01833          | Inner_Mongolia | Female | 60 | 3  | <i>H. pylori positive</i> | antrum | Atrophic gastritis        |
| 10GN     | 10GN.v4      | DMP01833          | Inner_Mongolia | Female | 60 | 3  | <i>H. pylori positive</i> | antrum | Atrophic gastritis        |
| 11GC     | 11GC.v4      | DMP01832          | Inner_Mongolia | Male   | 64 | 3  | <i>H. pylori negative</i> | antrum | Atrophic gastritis        |
| 11GN     | 11GN.v4      | DMP01832          | Inner_Mongolia | Male   | 64 | 3  | <i>H. pylori positive</i> | antrum | Atrophic gastritis        |
| AG38     | 124AG38.v4   | DMP01783          | Inner_Mongolia | Male   | 60 | 3  | <i>H. pylori negative</i> | antrum | Atrophic gastritis        |
| 12GC     | 12GC.v4      | DMP01833          | Inner_Mongolia | Male   | NA | NA | <i>H. pylori positive</i> | antrum | Atrophic gastritis        |
| 13GC     | 13GC.v4      | DMP01832          | Inner_Mongolia | Male   | 45 | 2  | <i>H. pylori positive</i> | antrum | Atrophic gastritis        |
| 13GN     | 13GN.v4      | DMP01832          | Inner_Mongolia | Male   | 45 | 2  | <i>H. pylori positive</i> | antrum | Atrophic gastritis        |
| 14GC     | 14GC.v4      | DMP01832          | Inner_Mongolia | Female | 65 | 3  | <i>H. pylori positive</i> | antrum | Atrophic gastritis        |
| 14GN     | 14GN.v4      | DMP01832          | Inner_Mongolia | Female | 65 | 3  | <i>H. pylori positive</i> | antrum | Atrophic gastritis        |
| 16GC     | 16GC.v4      | DMP01833          | Inner_Mongolia | Male   | 57 | 2  | <i>H. pylori positive</i> | antrum | Atrophic gastritis        |
| 16GN     | 16GN.v4      | DMP01833          | Inner_Mongolia | Male   | 57 | 2  | <i>H. pylori positive</i> | antrum | Atrophic gastritis        |
| 19GC     | 19GC212.v4   | DMP01783          | Inner_Mongolia | Female | 43 | 2  | <i>H. pylori negative</i> | antrum | Atrophic gastritis        |
| 19GN     | 19GN.v4      | DMP01814          | Inner_Mongolia | Female | 43 | 2  | <i>H. pylori positive</i> | antrum | Atrophic gastritis        |
| 1GC      | 1GC.v4       | DMP01832          | Inner_Mongolia | Male   | 73 | 3  | <i>H. pylori positive</i> | antrum | Atrophic gastritis        |
| 1GN      | 1GN.v4       | DMP01832          | Inner_Mongolia | Male   | 73 | 3  | <i>H. pylori positive</i> | antrum | Atrophic gastritis        |
| 20GC     | 20GC.v4      | DMP01814          | Inner_Mongolia | Female | 71 | 3  | <i>H. pylori negative</i> | antrum | Atrophic gastritis        |
| 20GC2    | 20GC2.v4     | DMP01814          | Inner_Mongolia | Female | 71 | 3  | <i>H. pylori positive</i> | antrum | Atrophic gastritis        |
| 21GC     | 21GC.v4      | DMP01814          | Inner_Mongolia | Male   | 76 | 3  | <i>H. pylori negative</i> | antrum | Atrophic gastritis        |
| 21GN     | 21GN.v4      | DMP02045_DMP01814 | Inner_Mongolia | Male   | 76 | 3  | <i>H. pylori negative</i> | antrum | Atrophic gastritis        |
| 22GC     | 22GC.v4      | DMP01832          | Inner_Mongolia | NA     | NA | NA | <i>H. pylori positive</i> | antrum | Atrophic gastritis        |
| 22GN     | 22GN.v4      | DMP01832          | Inner_Mongolia | NA     | NA | NA | <i>H. pylori positive</i> | antrum | Atrophic gastritis        |
| 23GC     | 23GC.v4      | DMP01833          | Inner_Mongolia | Male   | 64 | 3  | <i>H. pylori positive</i> | antrum | Atrophic gastritis        |
| 24GC     | 24GC.v4      | DMP01814          | Inner_Mongolia | Male   | 77 | 3  | <i>H. pylori negative</i> | antrum | Atrophic gastritis        |
| 24GN     | 24GN.v4      | DMP01814          | Inner_Mongolia | Male   | 77 | 3  | <i>H. pylori negative</i> | antrum | Atrophic gastritis        |
| 25GC     | 25GC.v4      | DMP01814          | Inner_Mongolia | Female | 71 | 3  | <i>H. pylori negative</i> | antrum | Atrophic gastritis        |
| 25GN     | 25GN.v4      | DMP01783          | Inner_Mongolia | Female | 71 | 3  | <i>H. pylori negative</i> | antrum | Atrophic gastritis        |
| 26GC     | 26GC.v4      | DMP01814          | Inner_Mongolia | Male   | 65 | 3  | <i>H. pylori positive</i> | antrum | Atrophic gastritis        |
| 26GN     | 26GN.v4      | DMP01783          | Inner_Mongolia | Male   | 65 | 3  | <i>H. pylori negative</i> | antrum | Atrophic gastritis        |
| 27GC     | 27GC.v4      | DMP01814          | Inner_Mongolia | Male   | 59 | 2  | <i>H. pylori positive</i> | antrum | Atrophic gastritis        |
| 27GN     | 27GN.v4      | DMP01814          | Inner_Mongolia | Male   | 59 | 2  | <i>H. pylori positive</i> | antrum | Atrophic gastritis        |
| 28GC     | 28GC.v4      | DMP01832          | Inner_Mongolia | Male   | 82 | 3  | <i>H. pylori positive</i> | antrum | Atrophic gastritis        |
| 28GN     | 28GN.v4      | DMP01832          | Inner_Mongolia | Male   | 82 | 3  | <i>H. pylori positive</i> | antrum | Atrophic gastritis        |
| 29GC     | 29GC.v4      | DMP01814          | Inner_Mongolia | Female | 34 | 1  | <i>H. pylori positive</i> | antrum | Atrophic gastritis        |
| 29GN     | 29GN.v4      | DMP01814          | Inner_Mongolia | Female | 34 | 1  | <i>H. pylori positive</i> | antrum | Atrophic gastritis        |
| 2GC      | 2GC.v4       | DMP01832          | Inner_Mongolia | Male   | 74 | 3  | <i>H. pylori positive</i> | antrum | Atrophic gastritis        |
| 2GN      | 2GN.v4       | DMP01832          | Inner_Mongolia | Male   | 74 | 3  | <i>H. pylori negative</i> | antrum | Atrophic gastritis        |
| 30GC     | 30GC.v4      | DMP01813          | Inner_Mongolia | Male   | 23 | 1  | <i>H. pylori positive</i> | antrum | Atrophic gastritis        |
| 30GN     | 30GN.v4      | DMP01813          | Inner_Mongolia | Male   | 23 | 1  | <i>H. pylori positive</i> | antrum | Atrophic gastritis        |
| 32GC     | 32GC.v4      | DMP01813          | Inner_Mongolia | Male   | 54 | 2  | <i>H. pylori positive</i> | antrum | Atrophic gastritis        |
| 32GN     | 32GN.v4      | DMP01813          | Inner_Mongolia | Male   | 54 | 2  | <i>H. pylori positive</i> | antrum | Atrophic gastritis        |
| 33GC     | 33GC.v4      | DMP01813          | Inner_Mongolia | Female | 21 | 1  | <i>H. pylori positive</i> | antrum | Atrophic gastritis        |
| 33GN     | 33GN.v4      | DMP01813          | Inner_Mongolia | Female | 21 | 1  | <i>H. pylori positive</i> | antrum | Atrophic gastritis        |
| 34GC     | 34GC.v4      | DMP01813          | Inner_Mongolia | Male   | 69 | 3  | <i>H. pylori positive</i> | antrum | Atrophic gastritis        |
| 34GN     | 34GN.v4      | DMP01813          | Inner_Mongolia | Male   | 69 | 3  | <i>H. pylori positive</i> | antrum | Atrophic gastritis        |
| 3GC      | 3GC.v4       | DMP01832          | Inner_Mongolia | Female | 76 | 3  | <i>H. pylori positive</i> | antrum | Atrophic gastritis        |
| 3GN      | 3GN.v4       | DMP01832          | Inner_Mongolia | Female | 76 | 3  | <i>H. pylori positive</i> | antrum | Atrophic gastritis        |
| 4GC      | 4GC.v4       | DMP01832          | Inner_Mongolia | Male   | 58 | 2  | <i>H. pylori positive</i> | antrum | Atrophic gastritis        |
| 4GN      | 4GN.v4       | DMP01832          | Inner_Mongolia | Male   | 58 | 2  | <i>H. pylori positive</i> | antrum | Atrophic gastritis        |
| 5GC      | 5GC.v4       | DMP01832          | Inner_Mongolia | Male   | 59 | 2  | <i>H. pylori negative</i> | antrum | Atrophic gastritis        |
| 5GN      | 5GN.v4       | DMP01832          | Inner_Mongolia | Male   | 59 | 2  | <i>H. pylori positive</i> | antrum | Atrophic gastritis        |
| 6GC      | 6GC.v4       | DMP01832          | Inner_Mongolia | Male   | 57 | 2  | <i>H. pylori negative</i> | body   | Gastric cancer            |
| 6GN      | 6GN.v4       | DMP01832          | Inner_Mongolia | Male   | 57 | 2  | <i>H. pylori positive</i> | body   | Gastric cancer            |
| 7GC      | 7GC.v4       | DMP01832          | Inner_Mongolia | Male   | 77 | 3  | <i>H. pylori positive</i> | body   | Gastric cancer            |
| 7GN      | 7GN.v4       | DMP01832          | Inner_Mongolia | Male   | 77 | 3  | <i>H. pylori positive</i> | antrum | Gastric cancer            |
| 8GC      | 8GC.v4       | DMP01832          | Inner_Mongolia | Male   | 52 | 2  | <i>H. pylori negative</i> | antrum | Gastric cancer            |
| 8GN      | 8GN.v4       | DMP01832          | Inner_Mongolia | Male   | 52 | 2  | <i>H. pylori positive</i> | body   | Gastric cancer            |
| AG1      | AG1.v4       | DMP01832          | Inner_Mongolia | Male   | 65 | 3  | <i>H. pylori positive</i> | body   | Gastric cancer            |
| AG10     | AG10.v4      | DMP01832          | Inner_Mongolia | Male   | 58 | 2  | <i>H. pylori positive</i> | body   | Gastric cancer            |
| AG11     | AG11.v4      | DMP01832          | Inner_Mongolia | Male   | 61 | 3  | <i>H. pylori negative</i> | body   | Gastric cancer            |
| AG12     | AG12.v4      | DMP01832          | Inner_Mongolia | Female | 75 | 3  | <i>H. pylori positive</i> | fundus | Gastric cancer            |
| AG13     | AG13.v4      | DMP01832          | Inner_Mongolia | Female | 72 | 3  | <i>H. pylori positive</i> | fundus | Gastric cancer            |

|        |             |                   |                |        |    |    |                           |        |                           |
|--------|-------------|-------------------|----------------|--------|----|----|---------------------------|--------|---------------------------|
| AG14   | AG14.v4     | DMP01832          | Inner_Mongolia | Female | 74 | 3  | <i>H. pylori positive</i> | fundus | Gastric cancer            |
| AG15   | AG15.v4     | DMP01832          | Inner_Mongolia | Female | NA | NA | <i>H. pylori positive</i> | fundus | Gastric cancer            |
| AG16   | AG16.v4     | DMP01832          | Inner_Mongolia | Female | 44 | 2  | <i>H. pylori positive</i> | fundus | Gastric cancer            |
| AG17   | AG17.v4     | DMP01832          | Inner_Mongolia | Male   | NA | NA | <i>H. pylori negative</i> | fundus | Gastric cancer            |
| AG18   | AG18.v4     | DMP01832          | Inner_Mongolia | Female | 59 | 2  | <i>H. pylori negative</i> | NA     | Gastric cancer            |
| AG19   | AG19.v4     | DMP01832          | Inner_Mongolia | Male   | 52 | 2  | <i>H. pylori positive</i> | NA     | Gastric cancer            |
| AG2    | AG2.v4      | DMP01832          | Inner_Mongolia | Male   | 52 | 2  | <i>H. pylori positive</i> | NA     | Gastric cancer            |
| AG20   | AG20.v4     | DMP01832          | Inner_Mongolia | Female | 72 | 3  | <i>H. pylori positive</i> | NA     | Gastric cancer            |
| AG21   | AG21.v4     | DMP01832          | Inner_Mongolia | Male   | 59 | 2  | <i>H. pylori positive</i> | body   | Carcinoma_adjacent normal |
| AG22   | AG22.v4     | DMP01832          | Inner_Mongolia | Male   | 64 | 3  | <i>H. pylori positive</i> | body   | Carcinoma_adjacent normal |
| AG23   | AG23.v4     | DMP01832          | Inner_Mongolia | Male   | 65 | 3  | <i>H. pylori positive</i> | antrum | Carcinoma_adjacent normal |
| AG24   | AG24.v4     | DMP01832          | Inner_Mongolia | Female | 51 | 2  | <i>H. pylori positive</i> | antrum | Carcinoma_adjacent normal |
| AG25   | AG25.v4     | DMP01832          | Inner_Mongolia | Female | 35 | 1  | <i>H. pylori positive</i> | body   | Carcinoma_adjacent normal |
| AG26   | AG26.v4     | DMP01832          | Inner_Mongolia | Female | 74 | 3  | <i>H. pylori positive</i> | body   | Carcinoma_adjacent normal |
| AG27   | AG27.v4     | DMP01832          | Inner_Mongolia | Male   | 43 | 2  | <i>H. pylori positive</i> | body   | Carcinoma_adjacent normal |
| AG28   | AG28.v4     | DMP01814          | Inner_Mongolia | Male   | 63 | 3  | <i>H. pylori negative</i> | body   | Carcinoma_adjacent normal |
| AG29   | AG29.v4     | DMP02204_DMP01814 | Inner_Mongolia | Male   | 59 | 2  | <i>H. pylori negative</i> | fundus | Carcinoma_adjacent normal |
| AG3    | AG3.v4      | DMP01832          | Inner_Mongolia | Female | 63 | 3  | <i>H. pylori positive</i> | fundus | Carcinoma_adjacent normal |
| AG30   | AG30237.v4  | DMP01900          | Inner_Mongolia | Female | 60 | 3  | <i>H. pylori negative</i> | fundus | Carcinoma_adjacent normal |
| AG31   | AG31.v4     | DMP01814          | Inner_Mongolia | Female | 59 | 2  | <i>H. pylori negative</i> | fundus | Carcinoma_adjacent normal |
| AG32   | AG32.v4     | DMP01783          | Inner_Mongolia | Male   | 49 | 2  | <i>H. pylori negative</i> | fundus | Carcinoma_adjacent normal |
| AG33   | AG33.v4     | DMP01814          | Inner_Mongolia | Male   | 47 | 2  | <i>H. pylori positive</i> | NA     | Carcinoma_adjacent normal |
| AG34   | AG34.v4     | DMP01814          | Inner_Mongolia | Male   | 72 | 3  | <i>H. pylori negative</i> | NA     | Carcinoma_adjacent normal |
| AG35   | AG35.v4     | DMP01783          | Inner_Mongolia | Male   | 65 | 3  | <i>H. pylori negative</i> | NA     | Carcinoma_adjacent normal |
| AG36   | AG36.v4     | DMP01833          | Inner_Mongolia | Female | 46 | 2  | <i>H. pylori positive</i> | NA     | Carcinoma_adjacent normal |
| AG50   | AG50.v4     | DMP01833          | Inner_Mongolia | Female | 59 | 2  | <i>H. pylori positive</i> | antrum | Superficial gastritis     |
| AG39   | AG50X.v4    | DMP01833          | Inner_Mongolia | Male   | 51 | 2  | <i>H. pylori positive</i> | antrum | Superficial gastritis     |
| AG51   | AG51.v4     | DMP01833          | Inner_Mongolia | Female | 56 | 2  | <i>H. pylori positive</i> | antrum | Superficial gastritis     |
| AG52   | AG52.v4     | DMP01832          | Inner_Mongolia | Male   | 57 | 2  | <i>H. pylori positive</i> | antrum | Superficial gastritis     |
| AG52X  | AG52X.v4    | DMP01813          | Inner_Mongolia | Male   | 57 | 2  | <i>H. pylori positive</i> | antrum | Superficial gastritis     |
| AG53   | AG53.v4     | DMP01832          | Inner_Mongolia | Male   | 32 | 1  | <i>H. pylori positive</i> | antrum | Superficial gastritis     |
| AG6    | AG6.v4      | DMP01832          | Inner_Mongolia | Male   | 66 | 3  | <i>H. pylori negative</i> | antrum | Superficial gastritis     |
| AG7    | AG7.v4      | DMP01832          | Inner_Mongolia | Female | 44 | 2  | <i>H. pylori positive</i> | antrum | Superficial gastritis     |
| AG8    | AG8.v4      | DMP01832          | Inner_Mongolia | Male   | 72 | 3  | <i>H. pylori positive</i> | antrum | Superficial gastritis     |
| AG9    | AG9.v4      | DMP01832          | Inner_Mongolia | Female | 66 | 3  | <i>H. pylori positive</i> | antrum | Superficial gastritis     |
| NAG-30 | NAG_30.v4   | DMP01814          | Inner_Mongolia | Male   | 45 | 2  | <i>H. pylori negative</i> | antrum | Superficial gastritis     |
| NAG-32 | NAG_32.v4   | DMP01814          | Inner_Mongolia | Male   | 34 | 1  | <i>H. pylori negative</i> | antrum | Superficial gastritis     |
| NAG-34 | NAG_34.v4   | DMP01814          | Inner_Mongolia | Male   | 61 | 3  | <i>H. pylori negative</i> | antrum | Superficial gastritis     |
| NAG1   | NAG1.v4     | DMP01832          | Inner_Mongolia | Male   | 28 | 1  | <i>H. pylori positive</i> | antrum | Superficial gastritis     |
| NAG10  | NAG10.v4    | DMP01832          | Inner_Mongolia | Female | 49 | 2  | <i>H. pylori positive</i> | antrum | Superficial gastritis     |
| NAG11  | NAG11.v4    | DMP01832          | Inner_Mongolia | Male   | 40 | 1  | <i>H. pylori positive</i> | antrum | Superficial gastritis     |
| NAG12  | NAG12.v4    | DMP01832          | Inner_Mongolia | Female | 57 | 2  | <i>H. pylori negative</i> | antrum | Superficial gastritis     |
| NAG13  | NAG13.v4    | DMP01832          | Inner_Mongolia | Female | 74 | 3  | <i>H. pylori negative</i> | antrum | Superficial gastritis     |
| NAG15  | NAG15.v4    | DMP01832          | Inner_Mongolia | Female | 41 | 2  | <i>H. pylori positive</i> | antrum | Superficial gastritis     |
| NAG16  | NAG16.v4    | DMP01832          | Inner_Mongolia | Female | 51 | 2  | <i>H. pylori negative</i> | antrum | Superficial gastritis     |
| NAG18  | NAG18.v4    | DMP01832          | Inner_Mongolia | Male   | 50 | 2  | <i>H. pylori positive</i> | antrum | Superficial gastritis     |
| NAG19  | NAG19.v4    | DMP01832          | Inner_Mongolia | Female | 57 | 2  | <i>H. pylori positive</i> | antrum | Superficial gastritis     |
| NAG2   | NAG2.v4     | DMP01832          | Inner_Mongolia | Male   | 50 | 2  | <i>H. pylori positive</i> | antrum | Superficial gastritis     |
| NAG20  | NAG20.v4    | DMP01832          | Inner_Mongolia | Female | 43 | 2  | <i>H. pylori positive</i> | antrum | Superficial gastritis     |
| NAG21  | NAG21.v4    | DMP01832          | Inner_Mongolia | Female | 32 | 1  | <i>H. pylori negative</i> | antrum | Superficial gastritis     |
| NAG23  | NAG23.v4    | DMP01832          | Inner_Mongolia | Female | 61 | 3  | <i>H. pylori positive</i> | antrum | Superficial gastritis     |
| NAG24  | NAG24.v4    | DMP01832          | Inner_Mongolia | Female | 49 | 2  | <i>H. pylori positive</i> | antrum | Superficial gastritis     |
| NAG25  | NAG25.v4    | DMP01832          | Inner_Mongolia | Male   | 28 | 1  | <i>H. pylori positive</i> | antrum | Superficial gastritis     |
| NAG26  | NAG26.v4    | DMP01832          | Inner_Mongolia | Female | 36 | 1  | <i>H. pylori positive</i> | antrum | Superficial gastritis     |
| NAG27  | NAG27.v4    | DMP01832          | Inner_Mongolia | Female | 56 | 2  | <i>H. pylori positive</i> | antrum | Superficial gastritis     |
| NAG28  | NAG28.v4    | DMP01832          | Inner_Mongolia | Female | 43 | 2  | <i>H. pylori positive</i> | antrum | Superficial gastritis     |
| NAG-29 | NAG29260.v4 | DMP01783          | Inner_Mongolia | Female | 46 | 2  | <i>H. pylori negative</i> | antrum | Superficial gastritis     |
| NAG3   | NAG3.v4     | DMP01832          | Inner_Mongolia | Male   | 62 | 3  | <i>H. pylori negative</i> | antrum | Superficial gastritis     |
| NAG33  | NAG33.v4    | DMP01832          | Inner_Mongolia | Female | 41 | 2  | <i>H. pylori positive</i> | antrum | Superficial gastritis     |
| NAG35  | NAG35.v4    | DMP01833          | Inner_Mongolia | Female | 63 | 3  | <i>H. pylori positive</i> | antrum | Superficial gastritis     |
| NAG37  | NAG37.v4    | DMP01814          | Inner_Mongolia | Male   | 43 | 2  | <i>H. pylori positive</i> | antrum | Superficial gastritis     |
| NAG38  | NAG38.v4    | DMP01783          | Inner_Mongolia | Female | 69 | 3  | <i>H. pylori negative</i> | antrum | Superficial gastritis     |
| NAG39  | NAG39.v4    | DMP01783          | Inner_Mongolia | Male   | 54 | 2  | <i>H. pylori negative</i> | antrum | Superficial gastritis     |
| NAG4   | NAG4.v4     | DMP01832          | Inner_Mongolia | Male   | 54 | 2  | <i>H. pylori negative</i> | antrum | Superficial gastritis     |
| NAG40  | NAG40.v4    | DMP01814          | Inner_Mongolia | Female | 31 | 1  | <i>H. pylori negative</i> | antrum | Superficial gastritis     |
| NAG41  | NAG41.v4    | DMP01833          | Inner_Mongolia | Female | 40 | 1  | <i>H. pylori positive</i> | antrum | Superficial gastritis     |
| NAG43  | NAG43.v4    | DMP01833          | Inner_Mongolia | Female | 40 | 1  | <i>H. pylori positive</i> | antrum | Superficial gastritis     |

|       |             |                   |                |        |    |    |                           |        |                       |
|-------|-------------|-------------------|----------------|--------|----|----|---------------------------|--------|-----------------------|
| NAG44 | NAG44.v4    | DMP01833          | Inner_Mongolia | Male   | 61 | 3  | <i>H. pylori positive</i> | antrum | Superficial gastritis |
| NAG45 | NAG45.v4    | DMP01833          | Inner_Mongolia | Male   | 58 | 2  | <i>H. pylori positive</i> | antrum | Superficial gastritis |
| NAG46 | NAG46.v4    | DMP01833          | Inner_Mongolia | Male   | 56 | 2  | <i>H. pylori positive</i> | antrum | Superficial gastritis |
| NAG47 | NAG47.v4    | DMP01833          | Inner_Mongolia | Female | 48 | 2  | <i>H. pylori positive</i> | antrum | Superficial gastritis |
| NAG48 | NAG48131.v4 | DMP01783          | Inner_Mongolia | Female | 29 | 1  | <i>H. pylori negative</i> | antrum | Superficial gastritis |
| NAG49 | NAG49.v4    | DMP01813          | Inner_Mongolia | Male   | 40 | 1  | <i>H. pylori positive</i> | antrum | Superficial gastritis |
| NAG5  | NAG5.v4     | DMP01832          | Inner_Mongolia | Male   | 57 | 2  | <i>H. pylori negative</i> | antrum | Superficial gastritis |
| NAG50 | NAG50.v4    | DMP01832          | Inner_Mongolia | Male   | 40 | 1  | <i>H. pylori positive</i> | antrum | Superficial gastritis |
| NAG51 | NAG51.v4    | DMP01813          | Inner_Mongolia | Female | 50 | 2  | <i>H. pylori positive</i> | antrum | Superficial gastritis |
| NAG53 | NAG53.v4    | DMP01813          | Inner_Mongolia | NA     | NA | NA | <i>H. pylori positive</i> | antrum | Superficial gastritis |
| NAG6  | NAG6.v4     | DMP01832          | Inner_Mongolia | Male   | 54 | 2  | <i>H. pylori positive</i> | antrum | Superficial gastritis |
| NAG7  | NAG7.v4     | DMP01832          | Inner_Mongolia | Male   | 71 | 3  | <i>H. pylori positive</i> | antrum | Superficial gastritis |
| NAG8  | NAG8.v4     | DMP01832          | Inner_Mongolia | Female | 57 | 2  | <i>H. pylori positive</i> | antrum | Superficial gastritis |
| NAG9  | NAG9.v4     | DMP02041_DMP01832 | Inner_Mongolia | Male   | 46 | 2  | <i>H. pylori negative</i> | antrum | Superficial gastritis |
