# Supplementary material for: Mucosal microbiome dysbiosis in gastric carcinogenesis
Source: PubMed Central journal article supplement — Gut. 2017 Aug 1;67(6):1024–32. doi: 10.1136/gutjnl-2017-314281 (PMC5969346; doi:10.1136/gutjnl-2017-314281), 2017-08-01
Supplement: gutjnl-2017-314281supp002.pdf [file gutjnl-2017-314281supp002.pdf]

Beta Diversities: measured by Braycurtis- dissimilarity distance matrices and Jaccard similarity coefficient, analyzed using analysis of molecular variance (AMOVA).

**Supplementary table 2: Biopsy site**

| Phenotype | Biopsy site        | p- value (Braycurtis) | p-value (Jaccard) |
|-----------|--------------------|-----------------------|-------------------|
| SG        | Antrum-Body-Fundus | 0.93                  | 0.221             |
| AG        | Antrum-Body-Fundus | 0.97                  | 0.903             |
| IM        | Antrum-Body-Fundus | 0.56                  | 0.083             |
| GC        | Cardia-Noncardia   | 0.86                  | 0.456             |

**Supplementary table 3: Disease Phenotype**

| Category | p- value (Braycurtis) | p-value (Jaccard) |
|----------|-----------------------|-------------------|
| SG-AG    | 0.99                  | 0.96              |
| SG-IM    | 0.31                  | 0.14              |
| SG-GC    | 0.031*                | 0.018*            |
| AG-IM    | 0.21                  | 0.29              |
| AG-GC    | 0.031*                | 0.082             |
| IM-GC    | 0.038*                | 0.0023*           |

SG: Superficial gastritis  
 AG: Atrophic gastritis  
 IM: Intestinal metaplasia  
 GC: Gastric cancer
