# Supplementary material for: Mucosal microbiome dysbiosis in gastric carcinogenesis
Source: PubMed Central journal article supplement — Gut. 2017 Aug 1;67(6):1024–32. doi: 10.1136/gutjnl-2017-314281 (PMC5969346; doi:10.1136/gutjnl-2017-314281), 2017-08-01
Supplement: gutjnl-2017-314281supp004.pdf [file gutjnl-2017-314281supp004.pdf]

**Supplementary table 4 : Gastric cancer (GC) -enriched and -depleted OTUs compared to superficial gastritis**

| OTU code  | Status      | OTU Taxonomy_greengenes database                                                                            | OTU representative sequence                                                                                                                                                                                                                           | Species level identification       | p value     | q value    |
|-----------|-------------|-------------------------------------------------------------------------------------------------------------|-------------------------------------------------------------------------------------------------------------------------------------------------------------------------------------------------------------------------------------------------------|------------------------------------|-------------|------------|
| Otu000005 | GC-enriched | k__Bacteria;p__Firmicutes;c__Bacilli;o__Lactobacillales;f__Streptococaceae;g__Streptococcus;s__infantis;    | TACGTAGGTCCCAGCGTTGTCGGATTATTGGGCGTAAAGCGAGCGCAGGCCGTTAGATAAGTCTGAAGTTAAAGGCTGTGGCTTAACCATAGTACGCTTTGAAACTGTTAACTTGAGTGAAGAGGGAGAGTGGAAATCCATGTGTAGCGGTGAAATGCGTAGATATATGGAGGAACACCGGTGGCGAAAGCCGCTCTGGCTTGAAGTACGCTGAGGCTCGAAAGCGTGGGGAGCAAACAGG     | <i>Streptococcus infantis</i>      | 0.005545567 | 0.03283371 |
| Otu000012 | GC-enriched | k__Bacteria;p__Firmicutes;c__Bacilli;o__Lactobacillales;f__Lactobacillaceae;g__Lactobacillus                | TACGTAGGTGGCAAGCGTTGTCGGATTATTGGGCGTAAAGGGAAACAGCAGGCCGTTTAAAGTCTGATGTGAAAGCCTTCGGCTTAACCGGAGTAGCATTGGAAACTGGAAGACTTGAGTGCAGAAAGGAGAGTGGAACTCATGTGTAGCGGTGAAATGCGTAGATATATGGAAGAACACCACTGGCGAAAGCGGCTCTGGTCTGAACTGACGCTGAGGTTCCGAAAGCGTGGGTAGCAAACAGG | <i>Lactobacillus salivarius</i>    | 0.016546424 | 0.03990608 |
| Otu000016 | GC-enriched | k__Bacteria;p__Firmicutes;c__Clostridia;o__Clostridiales;f__Peptostreptococaceae;g__Peptostreptococcus      | TACGTAGGGGGTAGCGTTATCCGGATTACTGGGCGTAAAGGGTGCCTAGGTTGCTTCAAGTCGGTGTAAAGGCTACGGCTCAACCTAGTAAAGCCGCGAAACTGGAGACTTGAGTGCAGGAGAGGAAAGTGGAAATCCAGTGTAGCGGTGAAATGCGTAGATATGGGAGGAACACCACTAGCGAAGCCGCTTCTGGACTGCAACTGACACTGAGGCGCAAAAGCGTGGGTAGCAAACAGG      | <i>Peptostreptococcus stomatis</i> | 0.013130375 | 0.02999834 |
| Otu000017 | GC-enriched | k__Bacteria;p__Firmicutes;c__Bacilli;o__Gemellales;f__Gemellaceae;g__Gemella;                               | TACGTAGGTGGCAAGCGTTGTCGGATTATTGGGCGTAAAGCGCGCGCAGGTTGTTAAAGTCTGATGTGAAAGCCACGGCTCAACCTGGAGGTGATTGGAACTGTTAACTTGAGTGCAGGAGAGAAAGTGGAAATCCATGTGTAGCGGTGAAATGCGTAGATATAGGAGGAACACCACTGGCGAAGCCGCTTTTTGGCCTGTAAGTACACTGAGGCGCGAAAGCGTGGGAGCAAACAGG        | ND                                 | 0.020916148 | 0.03364659 |
| Otu000033 | GC-enriched | k__Bacteria;p__Fusobacteria;c__Fusobacteriia;o__Fusobacteriales;f__Fusobacteriaceae;g__Fusobacterium;       | TACGTATGTCACGAGCGTTATCCGGATTATTGGGCGTAAAGCGCGTCTAGGTTGTTAAAGTCTGATGTGAAAGCCTTCGGCTTAACCGGAGTAGCATTGGAACTGTTAACTTGAGTGCAGGAGAGAAAGTGGAAATCCATGTGTAGCGGTGAAATGCGTAGATATGGGAGGAACACCACTGGCGAAGCCGCTTACTGGACAGACTGACGCTGAAGCGGAAAGCGTGGGTAGCAAACAGG       | <i>Fusobacterium nucleatum</i>     | 0.020117415 | 0.04083629 |
| Otu000035 | GC-enriched | k__Bacteria;p__Firmicutes;c__Clostridia;o__Clostridiales;f__[Tissierellaceae];g__Parvimonas                 | TACGTATGGGGCGAGCGTTGTCGGATTATTGGGCGTAAAGGGTACGTAGGCCGTTTTAAAGTCAAGTGTGAAAGCGTGAGGCTTAACCTCATTAAAGCACTTGAAGTGGAAAGACTTGAGTGAAGGAGAGGAAAGTGGAAATCCATGTGTAGCGGTGAAATGCGTAGATATAGGAGGAATACCGGTGGCGAAGCCGACTTCTGGACTTTACTGACGCTCAGTACGAAAGCGTGGGAGCAAACAGG | <i>Parvimonas micra</i>            | 0.001936456 | 0.04083629 |
| Otu000045 | GC-enriched | k__Bacteria;p__Firmicutes;c__Bacilli;o__Lactobacillales;f__Lactobacillaceae;g__Lactobacillus;s__fermentum   | TACGTAGGTGGCAAGCGTTATCCGGATTATTGGGCGTAAAGAGAGTGCAGGCCGTTTCTAAGTCTGATGTGAAAGCCTTCGGCTTAACCGGAGTAGCATTGGAAACTGGATAACTTGAGTGCAGAAAGGGTGTGAACTCATGTGTAGCGGTGAAATGCGTAGATATATGGAAGAACACCACTGGCGAAAGCGGCTACCTGGTCTGAACTGACGCTGAGACTCGAAAGCATGGGTAGCGAACAGG  | <i>Lactobacillus fermentum</i>     | 0.007509976 | 0.03283371 |
| Otu000068 | GC-enriched | k__Bacteria;p__Firmicutes;c__Bacilli;o__Lactobacillales;f__Streptococaceae;g__Streptococcus;s__anginosus;   | TACGTAGGTCCCAGCGTTGTCGGATTATTGGGCGTAAAGCGAGCGCAGGCCGTTAGAAAAGTCTGAAGTGAAGGCAAGTGGCTCAACCATGTAGGCTTTGAAACTGTTAACTTGAGTGCAGAAAGGGAGAGTGGAAATCCATGTGTAGCGGTGAAATGCGTAGATATATGGAGGAACACCGGTGGCGAAGCCGCTCTGGTCTGAACTGACGCTGAGGCTCGAAAGCGTGGGAGCGAACAGG     | <i>Streptococcus anginosus</i>     | 0.010105818 | 0.02999834 |
| Otu000085 | GC-depleted | k__Bacteria;p__Proteobacteria;c__Betaproteobacteria;o__Burkholderiales;f__Comamonadaceae;                   | TACGTAGGTGCGAGCGTTATCCGGATTACTGGGCGTAAAGCGTGCGCAGGCCGTTGATGAAGACAGATGTGAAATCCCGCGCTCAACCTGGAACTGCAATTGTGACTGCATCGTGGAGTGGCGCAGAGGGGATGGAAATCCGCGTGTAGCAGTGAATGCGTAGATATGGGAGGAACACCGATGGCGAAGGCAATCCCTGGCCTGCACTGACGCTATGCACGAAAGCGTGGGAGCAAACAGG     | ND                                 | 0.008031708 | 0.03283371 |
| Otu000090 | GC-enriched | k__Bacteria;p__Firmicutes;c__Clostridia;o__Clostridiales;f__Lachnospiraceae;g__Eubacterium;                 | TACGTAGGGGGCAAGCGTTATCCGGATTACTGGGTGTAAGGGAGCGCAGACCGCTTGCAAGTCTGAAGTGAAGCCCGGGCTTAACCCGGGACTGCTTTGAAACTGTGAAGTGTAGTGTGCGGAGAGGTAAGTGGAAATCCAGTGTAGCGGTGAAATGCGTAGATATGGGAGGAACACCGTGGCGAAGCCGCTTACTGGACGATAACTGACGTTGAGGCTCGAAGCGTGGGAGCAAACAGG      | ND                                 | 0.00593905  | 0.03283371 |
| Otu000115 | GC-enriched | k__Bacteria;p__Bacteroidetes;c__Bacteroidia;o__Bacteroidales;f__[Paraprevotellaceae];g__Alloprevotella;     | TACGGAAAGGTCAGCGCTTATCCGGATTATTGGGTTTAAAGGGAGCGTAGGCCGATTATTAAGTCAAGTGTGAAAGCGTGGCTCAACCATCGTTAGCCATTGAAACTGGTAGTCTTGAGTGCAGACAGGGATGCTGGAAGTCTGGTGTAGCGGTGAAATGCTTAGATATACGATGAACCTCGATCGCAAGGCAGGTGCCGGCTGCAACTGACGCTGAGGCTCGAAAGTGTGGGTATCAAACAGG  | ND                                 | 0.004671605 | 0.03283371 |
| Otu000148 | GC-enriched | k__Bacteria;p__Bacteroidetes;c__Bacteroidia;o__Bacteroidales;f__Prevotellaceae;g__Prevotella;               | TACGGAAAGGTCAGCGCTTATCCGGATTATTGGGTTTAAAGGGAGCGTAGGCCGTTAAGCGTGTGTGAAATGCAAGTGCACAGCTCTGCATGACGCGCAACTGGTCACTTGAGTGTGCGCAACGAGCGGAAATCCGTCGTGTAGCGGTGAAATGCTTAGATATGACGAAGAAGTCCGATTGGCGAAGCAGCTTGGGGAGCAACTGACGCTGAAAGTTCGAAAGTGGGGTATCGAACAGG       | <i>Prevotella oris</i>             | 0.007551867 | 0.03283371 |
| Otu000151 | GC-enriched | k__Bacteria;p__Firmicutes;c__Clostridia;o__Clostridiales;f__Veillonellaceae;g__Dialister;                   | TACGTAGGTGGCAAGCGTTGTCGGATTATTGGGCGTAAAGCGCGCGCAGGCCGTTTCTAAGTCCATCTTAAAGCGTGGGCTCAACCCATGAGGGGATGGAAACTGGGAAGTGGAGTATCGGAGAGGAAAGTGGAAATCCATGTGTAGCGGTGAAATGCGTAGATATGGAAGAACACCGGTGGCGAAGCCGACTTCTAGACGAAAAGTACGCTGAGGCGGAAAGCGTGGGAGCAAACAGG       | <i>Dialister pneumosintes</i>      | 0.003492768 | 0.03283371 |
| Otu000174 | GC-enriched | k__Bacteria;p__Actinobacteria;c__Coriobacteriia;o__Coriobacteriales;f__Coriobacteriaceae;g__Slackia;        | TACGTAGGGGGCAGCGTTATCCGGATTACTGGGCGTAAAGCGCGCGCAGGCCGCGCCCAAGCGGCTCGTGAAGCCGGGGCTCAACCCCGGAAAGCGAACCTGGCGGCTCGAGTGGGCGAGGGAGGATGGAAATCCCGGTGTAGCGGTGAAATGCGTAGATATCGGAGGAACACCGACGGCGAAGGCAGCCCTTGGGCTTCACTGACGCTGAGGCGGAAAGTGGGAGCGAACAGG            | <i>Slackia exigua</i>              | 0.01832997  | 0.03283371 |
| Otu000211 | GC-enriched | k__Bacteria;p__Bacteroidetes;c__Bacteroidia;o__Bacteroidales;f__Prevotellaceae;g__Prevotella;s__intermedia; | TACGGAAAGGTCAGCGCTTATCCGGATTATTGGGTTTAAAGGGAGTGTAGGCCGTTAAGCGTGTGTGAAATTAAGTGTCTCAACATCTACCTTGCAGCGCAACTGGCGGACTTGAGTGCACGCAACGTATGCGGAATTCATGGTGTAGCGGTGAAATGCTTAGATATCATGACGAACTCCGATTGCGAAGGCACGCTACGGGAGTGTACTGACGCTTAAAGTTCGAAAGTGGGGTATCGAACAGG | <i>Prevotella intermedia</i>       | 0.01121151  | 0.04073555 |
| Otu000231 | GC-enriched | k__Bacteria;p__Firmicutes;c__Clostridia;o__Clostridiales;f__Eubacteriaceae;g__Eubacteriaceae_unclassified;  | TACGTAGGGGGCAAGCGTTATCCGGATTACTGGGCGTAAAGGGTGCCTAGGCCGTTGTTAAGTCAAGTGAAGGCAAGTCAACTACTGTTCGGCTTGAAGTATCAAGCTTGAGTATAGGAGAGGAAAGTGGAAATCCAGTGTAGCGGTGAAATGCGTAGATATGGGAGGAATACCGGTGGCGAAGCCGACTTCTGGACTAAAAGTACGCTGAGGCGCAAAAGTGTGGGTAGCAAACAGG        | ND                                 | 0.036518589 | 0.03283371 |

|           |             |                                                                                                                                           |                                                                                                                                                                                                                                                                |                                       |             |            |
|-----------|-------------|-------------------------------------------------------------------------------------------------------------------------------------------|----------------------------------------------------------------------------------------------------------------------------------------------------------------------------------------------------------------------------------------------------------------|---------------------------------------|-------------|------------|
| Otu000246 | GC-depleted | k__Bacteria;p__Proteobacteria;c__Betaproteobacteria;o__Burkholderiales;f__Comamonadaceae;g__Hydrogenophaga;                               | TACGTAGGGTGAAGCGTTAATCGGAATTACTGGGCGTAAAGCGTGCGCAGGCGGTTTTGTAAAGACAGGCGTGAAATCCCGGGCTCAACCTGGGAATGGCGTTGTGACTGCAAGAGTGGAGTGGCGGAGGGGGATGGAATTCGGCGTGTAGCAGTGAATGCGTAGATATGCGGAGGAACACCGATGGCGAAGGCAATCCCTGGGCTGCACTGACGCTCATGCACGAAAGCGTGGGGAGCAACACAGG        | ND                                    | 0.029271642 | 0.04990874 |
| Otu000256 | GC-enriched | k__Bacteria;p__Firmicutes;c__Clostridia;o__Clostridiales;f__Peptococcaceae;g__Peptococcus;                                                | AAACATAGGGGGCAAGCGTTTGTCCGGAATCACTGGGCGTAAAGGGCGCGCAGGCGGTAATAAGTCAGGTGTGAAAGTTCGGGGCTCAACCCCGTGAATTGACCTGATACTGATAAACTAGAGTGTGGAGAGGTAAGTGGAAATTCCTAGTGTAGCGGTGGAATGCGTAGATATTAGGAGAACACCAAGTGGCGAAGGCGACTTACTGGCCAATAACTGACGCTGAGGCGCGAAAGCGTGGGGAGCAACACAGG | <i>Peptococcus oraltaxon167</i>       | 0.008539407 | 0.04615913 |
| Otu000267 | GC-enriched | k__Bacteria;p__Firmicutes;c__Clostridia;o__Clostridiales;f__Lachnospiraceae;g__Catonella;                                                 | TACGTAGGGGGCAAGCGTTAATCGGAATTACTGGGCGTAAAGGGAGCGCAGGCGGTTTTGCAAGTTGAGAGTGGAAAGCAGGGGGCTCAACCCCTGACTGCTCCAAAACGTAAAACCTGAGTATGGGAGAGGCGAGGCGGAATTCCTAGTGTAGCGGTGAAATGCTTAGATATTAGGAAGAACACCGGTGGCGAAGGCGGCTGCTGGACAAAACCTGACGCTGAGGCTCGAAAGCGTGGGTACCAACACAGG   | <i>Catonella morbi</i>                | 0.012542471 | 0.03283371 |
| Otu000294 | GC-enriched | k__Bacteria;p__Firmicutes;c__Clostridia;o__Clostridiales;f__Lachnospiraceae;g__Moryella;                                                  | TACGTAGGGGGCAAGCGTTAATCGGAATTACTGGGCGTAAAGGGAGCGCAGGCGGCTTGCAAGTGGAGTGAAGCCCGGCTTAAACCGGGAATGCTTTGGAAACTGCAAGGCTTGGAGTATCGGAGGGGCGAGGCGGAATTCCTAGTGTAGCGGTGAAATGCGTAGATATTAGGAAGAACACCGGTGGCGAAGGCGGCTGCTGGACAAAACCTGACGCTGAGGCTCGAAAGCGTGGGGAGCAACACAGG       | ND                                    | 0.025278541 | 0.03364659 |
| Otu000369 | GC-depleted | k__Bacteria;p__Proteobacteria;c__Gammaproteobacteria;o__Pseudomonadales;f__Moraxellaceae;g__Acinetobacter;                                | TACAGAGGGTGGCAGCGTTAATCGGAATTACTGGGCGTAAAGCGTGCGTAGGCGGCTTCTGAAGTTGGATGTGAAATCCCGGAGCTTAACTGGGAATGCAATCAAAACTGCGAGGCTAGAGTATGGGAGAGGATGGTAGAATTCAGGTGTAGCGGTGAAATGCGTAGAGATCTGGAGGAATACCGATGGCGAAGGCACCATCTGGCCTAATACTGACGCTGAGGTACGAAAGCATGGGGAGCAACACAGG     | <i>Acinetobacter baumannii</i>        | 0.030644586 | 0.04506175 |
| Otu000561 | GC-depleted | k__Bacteria;p__Actinobacteria;c__Actinobacteria;o__Actinomycetales;o__Actinomycetales_unclassified;o__Actinomycetales_unclassified;       | TACGTAGGGGGCGAGCGTTTGTCCGGAATTATGGGCGTAAAGGGCTCGTAGGCGGCTTGTGCGCTGTGTAAGTGGCGGGCTTAACTCCGTACGTGAGTGGGTACGGCGAGCTAGAGTGGGTGAGGCGTACTGGAATTCCTGTTGTAGCGGTGAAATGCGCAGATATCAGGAGGAACACCGATGGCGAAGGCGGCTCACTGGGCTGTACTGACGCTGAGGAGCGAAAGCGTGGGGAGCAACACAGG          | ND                                    | 0.005725176 | 0.04653437 |
| Otu000586 | GC-enriched | k__Bacteria;p__Firmicutes;c__Clostridia;o__Clostridiales;f__Veillonellaceae;g__Veillonella;                                               | TACGTAGTGGGCAAGCGTTTGTCCGGAATTATGGGCGTAAAGCGCGCGCAGGCGGCTATCCAGCTGTCTTAAAAGTTCGGGGCTCAACCCCGTGGATGGATGGAAACTAGTAGGCTAGAGTATCGGAGAGGAAGCGGAATTCCTAGTGTAGCGGTGAAATGCGTAGATATTAGGAAGAACACAGTGGCGAAGGCGGCTTCTGGACGAAAACCTGACGCTGAGGCGCGAAAGCCAGGGGAGCGAACCGG       | <i>Veillonella oraltaxon780</i>       | 0.027343392 | 0.04615913 |
| Otu000610 | GC-enriched | k__Bacteria;p__Firmicutes;c__Clostridia;o__Clostridiales;f__[Mogibacteriaceae];g__Eubacterium;                                            | TACGTAGGGGGCGAGCGTTAATCGGAATTACTGGGCGTAAAGAGTATGTAGGTGGTTAAGTAAAGCTAGGGTTTAAAGCGCAGACCCCAACTGCTGATGCCCGCGAAGCTTTAACTTGTAGTACAGGAGGGGAAGCGGAATTCCTAGTGTAGCGGTGAAATGCGTAGATATTAGGAGGAACACCAAGTGGCGAAGGCGGCTTCTGGACTGTAAGTACACTGAGATACGAAAGCGTGGGTAGCAACACAGG     | ND                                    | 0.036255658 | 0.04990874 |
| Otu000661 | GC-depleted | k__Bacteria;p__Proteobacteria;c__Betaproteobacteria;o__Neisseriales;f__Neisseriaceae;g__Vogesella;                                        | TACGTAGGGTGGCAGCGTTAATCGGAATTACTGGGCGTAAAGCGTGCGCAGGCGGTTTGATAAGCAGATGTGAAATCCCGGAGCTCAACTTGGGAACGCGTTTGGAACTGTGACTAGAGTGGCTGAGAGGGGGGTGGAATTCCTGCGTGTAGCAGTGAATGCGTAGAGATGGGAGGAACACCGATGGCGAAGGCAGCCCTGGGATGACACTGACGCTCATGCACGAAAGCGTGGGGAGCAACACAGG        | <i>Vogesella perlucida</i>            | 0.006619554 | 0.03283371 |
| Otu000714 | GC-depleted | k__Bacteria;p__Proteobacteria;c__Betaproteobacteria;o__SC-I-84;o__SC-I-84_unclassified;o__SC-I-84_unclassified;                           | TACGTAGGGTGGCAGCGTTAATCGGAATTACTGGGCGTAAAGCGTGCGCAGGCGGTTTCCGTGTGTCGATGTGAAAGCCCGGGCTTAACTGGGAATGGCATTGGAAACTGGCGGGCTTGGAGTGGCAGAGGGGGTGGAAATTCCTGCGTGTAGCAGTGAATGCGTAGATATTAGGAGGAACACCGATGGCGAAGGCAGCCCTGGGCTAACACTGACGCTCAGGCACGAAAGCGTGGGGAGCAACACAGG      | ND                                    | 0.025108163 | 0.04506175 |
| Otu000752 | GC-depleted | k__Bacteria;p__Acidobacteria;c__[Chloracidobacteria];o__RB41;f__Ellin6075;f__Ellin6075_unclassified;                                      | TACGTAGGGCAAGCGTTTGTCCGGAATTACTGGGCGTAAAGGGCGCGTAGGCGGCGCGTAAAGTCACTTGTGAAATCTCTGAGCTTAACTCAGAAGCCAAAGTACTGAGTGTGAAAGGGGCAATCGGAATTCCTGTTGTAGCGGTGAAATGCGTAGATATCAAGAGGAACACCTGAGGTGAGAGCGGTTGCTGGCCAAACACTGACGCTGAGGCGGAAAGCCAGGGGAGCAACACAGG                 | ND                                    | 0.028967925 | 0.04615913 |
| Otu000977 | GC-depleted | k__Bacteria;p__Proteobacteria;c__Betaproteobacteria;o__Rhodocyclales;f__Rhodocyclaceae;g__Methyloversatilis;                              | TACGTAGGGTGGCAGCGTTAATCGGAATTACTGGGCGTAAAGCGTGCGCAGGCGGTTGTGTAAGACAGGTGTGAAATCCCGGGCTTAACTGGGAACGCGCTTGTGACTGACGCGTAGAGTATGGCAGAGGGGGGTGGAATTCCTGCGTGTAGCAGTGAATGCGTAGAGATGGGAGGAACACCGATGGCGAAGGCAGCCCTGGGCAATACTGACGCTCATGCACGAAAGCGTGGGGAGCAACACAGG         | <i>Methyloversatilis discipulorum</i> | 0.010743935 | 0.03283371 |
| Otu001266 | GC-depleted | k__Bacteria;p__Proteobacteria;c__Deltaproteobacteria;o__Syntrophobacterales;f__Syntrophobacteraceae;f__Syntrophobacteraceae_unclassified; | TACGGAGGGTGTAGCGTTTGTCCGGAATCACTGGGCGTAAAGGGCGTGTAGGCGGTCGCTAAGTCTGATGTGAAATCCCTTCCGTCAACGAGGGAACTGCGTGGGACTGGGAGACTGAGTACCGGAGAGGAAGTGGAAATTCCTGCGTGTAGCGGTGAAATGCGTAGATATCGGGAGGAACATCGGTGGCGAAGGCGGCTTCTGGACGGTACTGACGCTGAGACGCGAAAGCGTGGGGAGCAACACAGG      | ND                                    | 0.033637103 | 0.04925433 |
| Otu001596 | GC-depleted | k__Bacteria;p__Proteobacteria;c__Gammaproteobacteria;o__Oceanospirillales;f__Halomonadaceae;g__Candidatus_Portiera;                       | TACGGAAAGGTGCAAGCGTTAATCGGAATTACTGGGCGTAAAGCGCGCGTAGGTTGGTTTGAAGTTGGATGTGAAAGCCCTGGGCTCAACCTAGGAATGCAATCCAAAACACTACTAGAGTACGATAGAGGGAGGTAGAAATTCCTAGTGTAGCGGTGGAATGCGTAGATATTAGGAAGAATACCAAGTGGCGAAGGCGGCTTCTGGACTGTACTGACACTGAGGTGCGAAAGCGTGGGTAGCGAACAGG     | ND                                    | 0.01887745  | 0.04073555 |
| Otu002428 | GC-enriched | k__Bacteria;p__Firmicutes;c__Clostridia;o__Clostridiales;f__[Mogibacteriaceae];f__[Mogibacteriaceae]_unclassified;                        | TACGTAGGGGGCGAGCGTTAATCGGAATTATGGGCGTAAAGAGTGTGCGTAGGTTGCTTAAAGCGAGGTTTAAAGCAATGGCCCAACCTATGCTGCCCTCGAAGTGGGAGGCTGAGTGCAGGAGAGGAAGCGGAATTCCTAGTGTAGCGGTGAAATGCGTAGATATTAGGAGGAACACCAAGTGGCGAAGGCGGCTTCTGGACTGTAACTGACACTGAGGCGGAAAGTGGGGGAGCAACACAGG           | ND                                    | 0.008829099 | 0.03283371 |

OTU: Operational taxonomic unit
