# Supplementary material for: Mucosal microbiome dysbiosis in gastric carcinogenesis
Source: PubMed Central journal article supplement — Gut. 2017 Aug 1;67(6):1024–32. doi: 10.1136/gutjnl-2017-314281 (PMC5969346; doi:10.1136/gutjnl-2017-314281), 2017-08-01
Supplement: gutjnl-2017-314281supp005.pdf [file gutjnl-2017-314281supp005.pdf]

**Supplementary table 5: Intestinal metaplasia (IM) -enriched and -depleted OTUs compared to superficial gastritis**

| OTU code  | Status      | OTU taxonomy greengenes database                                                                                                 | OTU representative sequence                                                                                                                                                                                                                                | p value     | q value    |
|-----------|-------------|----------------------------------------------------------------------------------------------------------------------------------|------------------------------------------------------------------------------------------------------------------------------------------------------------------------------------------------------------------------------------------------------------|-------------|------------|
| Otu000058 | IM-enriched | k__Bacteria;p__Proteobacteria;c__Gammaproteobacteria;o__Pseudomonadales;f__Pseudomonadales;g__Pseudomonas;                       | TACAGAGGGTGCAAGCGTTAATCGGAATTACTGGGCGTAAAGCGCGCTAGGGTGGTTGTAAAGTTGGATGTGAAATCCCCGGGCTCAACCTGGGAAGTGCATTCAAACTGACTGACTAGAGTATGGTAGAGGGTGGTGAATTCCTGTGTAGCGGTGAAATGCGTAGATATAGGAAGAACACCAGTGGCGAAGGCCACCACTGGACTAATACTGACACTGAGGTGCGAAAGCGTGGGGAGCAAACAGG    | 0.021017312 | 0.03687975 |
| Otu000236 | IM-enriched | k__Bacteria;p__Proteobacteria;c__Gammaproteobacteria;o__Vibrionales;f__Vibrionaceae;g__Vibrio;s__parahaemolyticus                | TACGGAGGGTGCGAGCGTTAATCGGAATTACTGGGCGTAAAGCGCTCTGAGGCGGTATGTCAAGTCAAGGGTGAATCCCCGCGCTCACGTGGGAAGTGCCTTTGAAACTGGCAAAGTGGAGTGTGTGAGAGGATAGTGAATTCAGGTGTAGGAGTGAATCCGTAGATATCTGGAGAACATCAGTGGCGAAGGCCACTATCTGGCACATAACTGACCGTAGGAGCGAAAGCGTGGGTAGCAAACAGG     | 0.006533705 | 0.03439816 |
| Otu000396 | IM-enriched | k__Bacteria;p__Acidobacteria;c__DA052;o__Ellin6513;o__Ellin6513_unclassified;o__Ellin6513_unclassified;                          | GACGTAGGGGGCCAGCGTTGTCTCGGAATTACTGGGTGTAAGGGTTCGTAGGCGGTGTGGCAAGTCCGGAGTGAATCTCTGGGCTCACTCAGGGGCTGCTCCGAAACTGCCGTGTAGAGTGTGGGAGAGGGCGGTGAATTCAGGTGTAGCGGTGAAATGCCGTAGATATCTGCAGAACACCCGTGGCGAAAGCGGGCGCTGGACCACTACTGACCGTAGGGAACGAAAGCTAGGGGAGCAAACAGG     | 0.006141177 | 0.03432152 |
| Otu001056 | IM-enriched | k__Bacteria;p__Proteobacteria;c__Gammaproteobacteria;o__Xanthomonadales;f__Xanthomonadales;g__Dyella;s__japonica                 | TACGAAGGGTGCAAGCGTTAATCGGAATTACTGGGCGTAAAGCGTGCCTAGGCGGTATTTAAGTCTGTGTGAAATCCCCGGGCTCAACCTGGGAATGGCAATGGATACTGGATAGCTAGAGTGTGATAGAGGATGGTGAATTCGGGTGTAGCGGTGAAATGCCGTAGAGATCGGGAGAACATCAGTGGCGAAGGCCCATCTGGATCAACACTGACCGTAGGCGACGAAAGCGTGGGGAGCAAACAGG    | 0.002282537 | 0.03432152 |
| Otu001373 | IM-enriched | k__Bacteria;p__Acidobacteria;c__DA052;o__Ellin6513;o__Ellin6513_unclassified;o__Ellin6513_unclassified;                          | TACGTAGGGGGCCAGCGTTGTCTCGGAATTACTGGGCGTAAAGGGTCCGTAGGCGGTGTAGCAAGTGCATAGTGAATCTCTGCGCTAACGACAGAGGCTGCTAACGAAACTGCTGTGTAGAGTGTGAGAGGGCGAGTGAATTCAGGTGTAGCGGTGAAATGCCGTAGATATCGTAGGAACATCCGAGGCGAAGGCCGCTCGTGGATCACAACACTGACCGTAGGCGACGAAAGCTAGGGGAGCAAACAGG | 0.009644358 | 0.03439816 |
| Otu001457 | IM-enriched | k__Bacteria;p__Proteobacteria;c__Gammaproteobacteria;o__Xanthomonadales;f__Xanthomonadales;g__Dokdonella;                        | TACGAAGGGTGCAAGCGTTACTCGGAATTACTGGGCGTAAAGCGTGCCTAGGCGGTGTGTAAAGTCTGTGTAAGCCCTGGGCTCAACCTGGGAATTCGATGGATACTGGCAAGCTAGAGTACGGTAGAGGATGGTGAATTCGGGTGTAGCGGTGAAATGCCGTAGAGATCGGGAGAACACCCGTGGCGAAGGCCCATCTGGACCACTACTGACCGTAGGCGACGAAAGCGTGGGGAGCAAACAGG      | 0.020057253 | 0.03795401 |
| Otu001703 | IM-enriched | k__Bacteria;p__Proteobacteria;c__Alphaproteobacteria;o__Rhodospirillales;f__Rhodospirillaceae;f__Rhodospirillaceae_unclassified; | TACGAAGGGGGCGAGCGTTGTTCGGAATTACTGGGCGTAAAGGGCGCGCAGGCGGATTAAGTCAAGTCAAGCGGTGAAAGCCCGGGCTTAACCTGGGAATTCGCTTGGGACTGATGGGCTGGAGTTCGGGAGAGGAGTGAATTCAGGTGTAGAGGTGAAATCGTAGATATGGGAAGAACACCCGTGGCGAAGGCCGCTCTGGACCGATACTGACCGTAGGCGCGAAAGCGTGGGGAGCAAACAGG      | 0.012442279 | 0.03687975 |
| Otu000489 | IM-depleted | k__Bacteria;p__Proteobacteria;c__Betaproteobacteria;o__Rhodocyclales;f__Rhodocyclaceae;g__Zoogloea;s__ramigera                   | TACGTAGGGTGCGAGCGTTAATCGGAATTACTGGGCGTAAAGCGTGCAGGCGGTATGTAAAGACAGATGTGAAATCCCCGGGCTCAACCTGGGAAGTGCCTTTGTGACTGCATAACTAGAGTACGGCAGAGGGAGTGAATTCGGGTGTAGCAGTGAATGCCGTAGAGATCGGAGGAACACCCGATGGCGAAGGCCAGCTCCTGGGCCAGTACTGACCGTATGCACGAAAGCGTGGGGAGCAAACAGG    | 0.030285104 | 0.04510473 |
| Otu000491 | IM-depleted | k__Bacteria;p__Actinobacteria;c__Acidimicrobia;o__Acidimicrobiales;f__OCS155;f__OCS155_unclassified;                             | TACGTAGGGGGCGAGCGTTATCCGGATTTACTGGGCGTAAAGAGCTCTGAGGCGGTCAACAAGTCCGGTGTGAAAGTTCAGGGCTCAACCTGAAATGTGATCGATACTGTGTGACTAGGATACGGTAGAGGTAGTGAATTCAGGTGTAGCGGTGAAATGCCGTAGATATCGGAGGAACACCAATTGCGAAGGCAGCTACTGGGCCGTATCGACCGTAGGAGCGAAAGCTAGGGGAGCAAACAGG       | 0.012588167 | 0.03432152 |
| Otu000549 | IM-depleted | k__Bacteria;p__Proteobacteria;c__Alphaproteobacteria;o__Rhizobiales;o__Rhizobiales_unclassified;o__Rhizobiales_unclassified;     | TACGAAGGGGGTACGCTTGTTCGGAATTACTGGGCGTAAAGCGCAGTAGGGCGGACATTTAAGTCAAGGGGTGAAATCCCCGGGCTCAACCCGGAACCGCCTTTGATACTGGGTGTCTTGTAGTTCGGAAGAGGTAGTGAATTCGAGTGTAGAGGTGAAATCGTAGATATTCGAGGAACACCCAGTGGCGAAGGCCGCTACTGTCGGATACTGACCGTAGGTTGCGAAAGCGTGGGGAGCAAACAGG    | 0.005014672 | 0.03432152 |
| Otu000711 | IM-depleted | k__Bacteria;p__Firmicutes;c__Clostridia;o__Clostridiales;f__Lachnospiraceae;f__Lachnospiraceae_unclassified;                     | TACGTAGGGGGCGAGCGTTATCCGGATTTACTGGGTGTAAGGGAGCGTAGACGGCGAAGCAAGTCTGAAGTGAAGCCCGGGGCTCAACCGGGACTGCTTTGAAACTGTTTGTAGAGTGTGGAGAGGTAAGTGAATTCCTAGTGTAGCGGTGAAATGCCGTAGATATTAGGAGAACACCCAGTGGCGAAGGCCGCTACTGGACAGTAACCTGACGTTGAGGCTCGAAAGCGTGGGGAGCAAACAGG      | 0.006291984 | 0.03432152 |
| Otu000744 | IM-depleted | k__Bacteria;p__Firmicutes;c__Clostridia;o__Clostridiales;f__Lachnospiraceae;f__Lachnospiraceae_unclassified;                     | TACGTAGGGGGCGAGCGTTATCCGGATTTACTGGGTGTAAGGGAGCGTAGACGGCCAGGCAAGTCTGATGTGAAAGCGGGGCTCAACCCCGGACTGCATTTGAAACTGTTTGGCTTGTAGTCCGGAGAGTAAAGCGAATTCCTAGTGTAGCGGTGAAATGCCGTAGATATTAGGAGGAACACCCAGTGGCGAAGGCCGCTACTGGACGGTAACCTGACGTTGAGGCTCGAAAGCGTGGGGAGCAAACAGG | 0.021271601 | 0.03795401 |
| Otu000795 | IM-depleted | k__Bacteria;p__Proteobacteria;c__Alphaproteobacteria;o__Sphingomonadales;f__Sphingomonadales;f__Sphingomonadales_unclassified;   | TACGGAGGGAGTACGCTTGTTCGGAATTACTGGGCGTAAAGCGTGCCTAGGCGGTGACTCAAGTCAAGAGGTGAAAGCCCTGGAGTCAACTCCAGAAGTGCCTTTGAAACTAGGTGCTAGATCTGGGAGAGGTAGTGAATTCGAGTGTAGAGGTGAAATCGTAGATATTCGGAAGAACACCCAGTGGCGAAGGCCGCTACTGGACAGAAATTGACCGTAGGCGACGAAAGCGTGGGGAGCAAACAGG    | 0.019979844 | 0.04770776 |
| Otu000796 | IM-depleted | k__Bacteria;p__Fusobacteria;c__Fusobacteriia;o__Fusobacteriales;f__Fusobacteriaceae;g__Fusobacterium;                            | TACGTATGTGCAAGCGTTATCCGGATTTACTGGGCGTAAAGCGCGCTAGGCGGTGTGTAAAGTCTGATGTGAAATGCGGGGCTCACTCCGATTTGCGTTGGAAACTGCCAACTAGAGTACTGGAGAGGTGGCGGAAGTCAAGTGTAGAGGTGAAATCGTAGATATTTGTAGGAATCCGATGGGGAAGCCAGCCACTGGACAGATACTGACGCTAAAGCGCGAAAGCGTGGGTAGCAAACAGG         | 0.025457827 | 0.03687975 |

|           |             |                                                                                                                                         |                                                                                                                                                                                                                                                            |             |            |
|-----------|-------------|-----------------------------------------------------------------------------------------------------------------------------------------|------------------------------------------------------------------------------------------------------------------------------------------------------------------------------------------------------------------------------------------------------------|-------------|------------|
| Otu000972 | IM-depleted | k__Bacteria;p__Bacteroidetes;c__Bacteroidia;o__Bacteroidales;f__Porphyromonadaceae;g__Parabacteroides;                                  | TACGGAGGATGCGAGCGTTATCCGGATTTATTGGGTTTAAAGGGTGGTAGGTGGTCTTTTAAGTCAGCGGTGAAAGTTTGGCTCAACCATAAAATGGCCATTGAAACTGGGAGACTTGAGTATGTTTGGTAGGCGGAATGCGTGGTGTAGCGGTGAAATGCATAGATATCAGCAGAACTCCGATTGCGAAGGCAGCTTGCCAAGCCATAACTGACACTGAAGCACGAAAGCGTGGGTATCAAACAGG    | 0.020211383 | 0.03432152 |
| Otu001001 | IM-depleted | k__Bacteria;p__Firmicutes;c__Clostridia;o__Clostridiales;f__Ruminococcaeae;f__Ruminococcaeae_unclassified;                              | TACGTAGGTGGCAAGCGTTGTCCGGATTTACTGGGTGTAAAGGGCGTGTAGGCGGAGATTCAGTCAGATGTGAAATCTTAGGGCTTAACTGAACTGCATTTGAAACTGAATCCCTTGAGTATCGGAGAGGAGCGGAATTCTAGTGTAGCGGTGAAATGCGTAGATATTAGGAGAACACCAGTGGCGAAGCGGCCTGCTGGACGACAACCTGACGCTGAGGCGGAAAGCGTGGGGAGCAAACAGG       | 0.020532616 | 0.03439816 |
| Otu001039 | IM-depleted | k__Bacteria;p__Planctomycetes;c__OM190;o__agg27;o__agg27_unclassified;d;o__agg27_unclassified;                                          | GACAGAGGTTGCAAACGTTGTCCGGAACTACTGGGCATAAAGCGCACGTAGGCGGTCCGTTAAGTCATGTGTGAAATCCCCCGGCTCAACCGGGAATTGCGCCTGATATGGCGGGCTAGAGATCGATAGGGTAGCGGAACTCCAGGTGGAGCGGTGAAATGCGTAGATATCTGGAGAACACCGGTGGCGAAAGCGGCTCACTGGATCGAAACTGACGCTGAGGTGCGAAAGCTAGGGTAGCAAACGGG   | 0.026474199 | 0.03687975 |
| Otu001260 | IM-depleted | k__Bacteria;p__Proteobacteria;c__Deltaproteobacteria;o__Myxococcales;f__OM27;f__OM27_unclassified;                                      | TACGGAGGTGCAAGCGTTGTCCGGATTTACTGGGCGTAAAGCGACCCGAGGCGGTGATTAAGTTGACGTGAAAGCCCCGGGCTCACTCGGGAAGTGGCTCAAAAAGTGGTGCAGTTGAGTACGGGAGAGGAGAGTGAATTCCTGGTGTAGAGGTGAAATTCGTAGATATCAGGAGAACACCGCGGCGAAGCGGCTCTTGCCCGGATACTGACGCTCATGGTTCGAAAGCGTGGGGAGCAAACAGG      | 0.007554345 | 0.03432152 |
| Otu001261 | IM-depleted | k__Bacteria;p__Bacteroidetes;c__Bacteroidia;o__Bacteroidales;f__Porphyromonadaceae;g__Paludibacter;                                     | TACGGAGGATCCGAGCGTTATCCGGATTTATTGGGTTTAAAGGGTGCGTAGGTGGATTGATAAGTCAGCGGTGAAAGTTGCGAGCTTAACTGAAAATGGCGTTGAAACTGTCCGTTTGTAGTGCATAATGAGTAGGCGGAATGTGTTGTAGCGGTGAAATGCTTAGATATAACACAGAACTCCGATTGCGAAGGCAGCTTACTGGGATGCAACTGACACTGATGCACGAAAGCGTGGGTATCAAACAGG  | 0.001640022 | 0.03432152 |
| Otu001405 | IM-depleted | k__Bacteria;p__Firmicutes;c__Clostridia;o__Clostridiales;f__Ruminococcaeae;g__Ruminococcus;                                             | TACGTAGGGAGCGAGCGTTGTCCGGAACTACTGGGTGTAAAGGGACGCTAGGCGGGATGGTAAGTCAGATGTGAAATATACGTGCTCAACATGTAGACTGCATTTGAAACTGTGTTCTTGAGTGAAGTAGAGGTAAGCGGAATTCCTAGTGTAGCGGTGAAATGCGTAGATATTAGGAGAACATCGGTGGCGAAGCGGCTTACTGGCITTTACTGACGCTGAGGCTCGAAAGCGTGGGGAGCAAACAGG  | 0.005928088 | 0.03432152 |
| Otu001476 | IM-depleted | k__Bacteria;p__Bacteroidetes;c__Bacteroidia;o__Bacteroidales;f__Rikenellaceae;g__Blvii28;                                               | TACGGAGGATCCTAGCGTTATCCGGATTTACTGGGTTTAAAGGGTGGTAGGCGGGCGCTTAAGTCCGCGGTGAAAGTCTGGGCTCAACCGTAGGATTGCGGTGATACTGGGCGCTTGGATTGCGTGGGCGGGAATGCGTGGTGTAGCGGTGAAATGCATAGATATCACGCAGAACGCCGATAGCGAAGGCAGCTCGCCGGGCGGATATCGACGCTGATGCACGAAAGCGTGGGGATCAAACAGG       | 0.018156425 | 0.03687975 |
| Otu001726 | IM-depleted | k__Bacteria;p__Firmicutes;c__Clostridia;o__Clostridiales;f__Ruminococcaeae;f__Ruminococcaeae_unclassified;                              | TACGTAGGTGGCGAGCGTTATCCGGATTTACTGGGTGTAAAGGGCGCGTAGGCGGGAATGCAAGTCAGATGTGAAATCCAAGGGCTCAACCTTGAAGTGCATTTGAAACTGTATTTCTTGAGTGTGCGGAGAGGTTGACGGAATTCCTAGTGTAGCGGTGAAATGCGTAGATATTAGGAGAACACCAGTGGCGAAGCGGTCAACTGGACGATAACTGACGCTGAGGCGGAAAGCGTGGGGAGCAAACAGG | 0.004164636 | 0.03432152 |
| Otu001906 | IM-depleted | k__Bacteria;p__Proteobacteria;c__Betaproteobacteria;o__Burkholderiales;o__Burkholderiales_unclassified;o__Burkholderiales_unclassified; | TACGTAGGTGCAAGCGTTAATCGGAACTACTGGGCGTAAAGCGTGGCAGGCGTTCTGTAAGACAGGTGTGAAATCCAAGGGCTTAACTTGGAAATGTCATTTGTGACTGCAGGACTAGAGTTTATCAGAGGGGGATGGAATCCAAGTGTAGCAGTGAATGCGTAGATATTTGGAAGAACACCAATGGCGAAGGCAGTCCCTGGGATACGACTGACGCTCATGCACGAAAGCGTGGGGAGCAAACAGG    | 0.015922464 | 0.03687975 |

OTU: Operational taxonomic unit
