# Supplementary material for: Mucosal microbiome dysbiosis in gastric carcinogenesis
Source: PubMed Central journal article supplement — Gut. 2017 Aug 1;67(6):1024–32. doi: 10.1136/gutjnl-2017-314281 (PMC5969346; doi:10.1136/gutjnl-2017-314281), 2017-08-01
Supplement: gutjnl-2017-314281supp006.pdf [file gutjnl-2017-314281supp006.pdf]

**Supplementary table 6: Gastric cancer (GC) -enriched OTUs that are significantly more abundant in GC than atrophic gastritis**

| OTU code  | p value   | q value   |
|-----------|-----------|-----------|
| Otu000005 | 0.002492  | 0.0091373 |
| Otu000016 | 0.0005432 | 0.0053134 |
| Otu000017 | 0.0019262 | 0.0077049 |
| Otu000033 | 0.0057505 | 0.0114422 |
| Otu000035 | 0.0054895 | 0.0114422 |
| Otu000045 | 0.0002618 | 0.0053134 |
| Otu000068 | 0.0004647 | 0.0053134 |
| Otu000090 | 0.0007246 | 0.0053134 |
| Otu000115 | 0.0017827 | 0.0077049 |
| Otu000148 | 0.0010518 | 0.0064997 |
| Otu000151 | 0.004019  | 0.0103001 |
| Otu000174 | 0.0006066 | 0.0053134 |
| Otu000211 | 0.0014632 | 0.0071532 |
| Otu000231 | 0.0059812 | 0.0114422 |
| Otu000256 | 0.0263213 | 0.030408  |
| Otu000267 | 0.0040045 | 0.0103001 |
| Otu000294 | 0.0037551 | 0.0103001 |
| Otu000586 | 0.003824  | 0.0103001 |
| Otu002428 | 0.0367702 | 0.0385211 |

**Supplementary table 7: Gastric cancer (GC) -enriched OTUs that are significantly more abundant in GC than intestinal metaplasia**

| OTU code  | p value   | q value   |
|-----------|-----------|-----------|
| Otu000033 | 0.0322114 | 0.0483171 |
| Otu000045 | 0.0028573 | 0.0149625 |
| Otu000115 | 0.0028162 | 0.0149625 |
| Otu000151 | 0.0106842 | 0.0226253 |
| Otu000231 | 0.0154635 | 0.0288478 |
| Otu000267 | 0.006319  | 0.0162488 |
| Otu002428 | 0.0074697 | 0.0179274 |

OTU: Operational taxonomic unit
