# Supplementary material for: Mucosal microbiome dysbiosis in gastric carcinogenesis
Source: PubMed Central journal article supplement — Gut. 2017 Aug 1;67(6):1024–32. doi: 10.1136/gutjnl-2017-314281 (PMC5969346; doi:10.1136/gutjnl-2017-314281), 2017-08-01
Supplement: gutjnl-2017-314281supp009.pdf [file gutjnl-2017-314281supp009.pdf]

**Supplementary table 9****Comparison of microbial interactions between *Helicobacter pylori* -positive and –negative samples at gastric cancer stages.**HPP: *Helicobacter pylori* positiveHPN: *Helicobacter pylori* negative

| Diagnosis | HPP                        |                           | HPN                        |                           | p value |
|-----------|----------------------------|---------------------------|----------------------------|---------------------------|---------|
|           | Number of significant OTUs | Ratio of significant OTUs | Number of significant OTUs | Ratio of significant OTUs |         |
| SG        | 431                        | 3.43%                     | 1553                       | 12.35%                    | <0.0001 |
| AG        | 592                        | 4.71%                     | 3648                       | 29.04%                    | <0.0001 |
| IM        | 574                        | 4.57%                     | 1966                       | 15.65%                    | <0.0001 |

Fisher's exact test was performed to compare the ratio of significant co-occurrence and co-excluding correlations coefficients ( $> 0.2$  or  $< -0.2$ ,  $q < 0.05$ )

SG: Superficial gastritis

AG: Atrophic gastritis

IM: Intestinal metaplasia
