# Supplementary material for: Mucosal microbiome dysbiosis in gastric carcinogenesis
Source: PubMed Central journal article supplement — Gut. 2017 Aug 1;67(6):1024–32. doi: 10.1136/gutjnl-2017-314281 (PMC5969346; doi:10.1136/gutjnl-2017-314281), 2017-08-01
Supplement: gutjnl-2017-314281supp010.pdf [file gutjnl-2017-314281supp010.pdf]

## Supplementary table 10: Interaction of OTUs with *Helicobacter pylori*

| OTU code  | Status of interaction     | OTU_Taxonomy greengenes database                                                                                              | OTU representative sequence                                                                            | q value |
|-----------|---------------------------|-------------------------------------------------------------------------------------------------------------------------------|--------------------------------------------------------------------------------------------------------|---------|
| Otu000023 | Co-excluding in IM        | k__Bacteria;p__Firmicutes;c__Bacilli;o__Lactobacillales;f__Lactobacillaceae;g__Lactobacillus;                                 | TACGTAGGTGGCAAGCGTTATCC<br>GGAATTATTGGGCGTAAAGCGC<br>GCGCAGGTGGTTTCTTAAGTCTG<br>GATGTGAAAGCCCTCGGCTTAA | 0.016   |
| Otu000029 | Co-occurring in IM        | k__Bacteria;p__Bacteroidetes;c__Bacteroidia;o__Bacteroidales;f__Prevotellaceae;g__Prevotella;s__melaninogenica;               | TACGGAAGGTCCAGGCGTTATCC<br>GGATTATTGGGTTTAAAGGGAG<br>CGTAGGCTGGAGATTAAAGTGTG<br>TGTGAAATGTAGACGCTCAA   | 0.029   |
| Otu000039 | Co-excluding in IM        | k__Bacteria;p__Firmicutes;c__Clostridia;o__Clostridiales;f__Clostridiaceae;g__SMB53;                                          | TACGTAGGGGCTAGCGTTATCC<br>GGAATTACTGGGCGTAAAGGGT<br>GCGTAGGTGGTTTCTTAAGTCAG<br>AGGTGAAAGGCTACGGCTCAA   | 0.038   |
| Otu000044 | Co-excluding in SG and IM | k__Bacteria;p__Proteobacteria;c__Betaproteobacteria;o__Methylophilales;f__Methylophilaceae;g__Methylobacillus;                | TACGTAGGGTGGAGCGTTAATC<br>GGAATTACTGGGCGTAAAGCGA<br>GCGCAGGCGGTTCTGCAAGTCA<br>GATGTGAAATCCCGGGCTCAA    | 0.027   |
| Otu000080 | Co-excluding in IM        | k__Bacteria;p__Firmicutes;c__Bacilli;o__Bacillales;o__Bacillales_unclassified;o__Bacillales_unclassified;                     | TACGTAGGTGGCAAGCGTTATCC<br>GGAATTATTGGGCGTAAAGCGC<br>GCGCAGGTGGTTTCTTAAGTCTG<br>ATGTGAAAGCCACGGCTCAA   | 0.0093  |
| Otu000087 | Co-occurring in IM        | k__Bacteria;p__Proteobacteria;c__Epsilonproteobacteria;o__Campylobacteriales;f__Helicobacteraceae;g__Helicobacter;s__ganmani; | TACGGAGGTGCAAGCGTTACTC<br>GGAATCACTGGGCGTAAAGAGC<br>GCGTAGGCGGATAGCAAGTCA<br>GATGTGAAATCTATGGCTTAA     | 0.0047  |
| Otu000108 | Co-occurring in SG and IM | k__Bacteria;p__Actinobacteria;c__Actinobacteria;o__Actinomycetales;f__Micrococccaceae;g__Arthrobacter;s__psychrolactophilus;  | TACGTAGGGCGCAAGCGTTATCC<br>GGAATTATTGGGCGTAAAGAGC<br>TCGTAGGCGGTTTGTGCGGCTG<br>CCGTGAAAGTCCGGGGCTCAA   | 0.023   |
| Otu000142 | Co-excluding in IM        | k__Bacteria;p__Firmicutes;c__Clostridia;o__Clostridiales;f__Ruminococcaceae;g__Ruminococcus;                                  | TACGTAGGAGTAAGCGTTATCC<br>GGAATTACTGGGTGTAAGGGA<br>GTGTAGGCGGACTTTAAGTCAG<br>ATGTGAAATTTATGGGCTCAA     | 0.016   |
| Otu000294 | Co-occurring in IM        | k__Bacteria;p__Firmicutes;c__Clostridia;o__Clostridiales;f__Ruminococcaceae;g__Ruminococcaceae;g__Moryella                    | TACGTAGGTGCAAGCGTTATCC<br>GGAATTACTGGGTGTAAGGGC<br>GTGTAGGCGGAGCTGCAAGTCA<br>GATGTGAAATCCCGGGCTCAA     | 0.038   |

OTU: Operational taxonomic unit

SG: Superficial gastritis

IM: Intestinal metaplasia
