# Supplementary material for: Mucosal microbiome dysbiosis in gastric carcinogenesis
Source: PubMed Central journal article supplement — Gut. 2017 Aug 1;67(6):1024–32. doi: 10.1136/gutjnl-2017-314281 (PMC5969346; doi:10.1136/gutjnl-2017-314281), 2017-08-01
Supplement: gutjnl-2017-314281supp011.pdf [file gutjnl-2017-314281supp011.pdf]

**Supplementary table 11: Differential predicted KEGG pathways (level 1) between SG and GC in Xi'an cohort**

| Predicted_function_level1            | LogMaxMean  | Class | LDA score   | p value     |
|--------------------------------------|-------------|-------|-------------|-------------|
| Human_Diseases                       | 4.018699801 | SG    | 2.37697232  | 0.097855694 |
| None                                 | 3.26406505  | SG    | 2.092408193 | 0.300861803 |
| Cellular_Processes                   | 4.638571949 | SG    | 3.194907075 | 0.005118644 |
| Genetic_Information_Processing       | 5.239795037 | GC    | 3.412014893 | 0.083922097 |
| Unclassified                         | 5.1491221   | SG    | 2.395499515 | 0.421786093 |
| Organismal_Systems                   | 3.868099166 | SG    | 1.874438161 | 0.223542875 |
| Metabolism                           | 5.685402521 | SG    | 2.996046349 | 0.407857616 |
| Environmental_Information_Processing | 5.154754896 | SG    | 2.583581983 | 0.798256737 |

**Supplementary table 12: Differential predicted KEGG pathways (level 1) among SG, AG, IM and GC in Xi'an cohort**

| Predicted_function_level1            | LogMaxMean  | Class | LDA score   | p value     |
|--------------------------------------|-------------|-------|-------------|-------------|
| Human_Diseases                       | 4.018699801 | SG    | 2.40994611  | 0.326085754 |
| None                                 | 3.264424563 | IM    | 2.201276466 | 0.780054825 |
| Cellular_Processes                   | 4.638571949 | SG    | 3.225708334 | 0.036555349 |
| Genetic_Information_Processing       | 5.239795037 | GC    | 3.406829566 | 0.357431883 |
| Unclassified                         | 5.151332062 | IM    | 2.67924077  | 0.29130315  |
| Organismal_Systems                   | 3.868099166 | SG    | 2.249476546 | 0.68192269  |
| Metabolism                           | 5.686489613 | AG    | 3.13008638  | 0.613276959 |
| Environmental_Information_Processing | 5.154754896 | SG    | 2.754532224 | 0.875766842 |

**Supplementary table 13: Differential predicted KEGG pathways (level 2) between SG and GC in Xi'an cohort**

| Predicted_function_level2                   | LogMaxMean  | Class | LDA score   | p value     |
|---------------------------------------------|-------------|-------|-------------|-------------|
| Signal_Transduction                         | 4.341301535 | SG    | 2.818655785 | 0.007968266 |
| Cell_Motility                               | 4.548710197 | SG    | 3.187397987 | 0.009194801 |
| Nucleotide_Metabolism                       | 4.551214475 | GC    | 2.888037287 | 0.035231381 |
| Nervous_System                              | 2.935003689 | GC    | 1.18443774  | 0.057594522 |
| Signaling_Molecules_and_Interaction         | 3.290642423 | GC    | 1.767019723 | 0.060871415 |
| Enzyme_Families                             | 4.287618987 | GC    | 2.443806337 | 0.067889155 |
| Circulatory_System                          | 2.722988701 | SG    | 1.604486901 | 0.075559124 |
| Translation                                 | 4.689204628 | GC    | 3.012109455 | 0.083922097 |
| Metabolic_Diseases                          | 2.950261188 | GC    | 1.086625336 | 0.086125929 |
| Replication_and_Repair                      | 4.888942808 | GC    | 3.096572179 | 0.08837628  |
| Neurodegenerative_Diseases                  | 3.537068016 | SG    | 2.201067613 | 0.108130545 |
| Amino_Acid_Metabolism                       | 5.012239902 | SG    | 2.927204455 | 0.108130545 |
| Cancers                                     | 3.139457971 | SG    | 1.581495391 | 0.113578908 |
| Cellular_Processes_and_Signaling            | 4.593413958 | SG    | 2.490081734 | 0.144127035 |
| Digestive_System                            | 2.540320201 | GC    | 1.335669129 | 0.147499101 |
| Environmental_Adaptation                    | 3.176457544 | SG    | 1.195904023 | 0.161592562 |
| Membrane_Transport                          | 5.08073651  | GC    | 2.831528709 | 0.172813001 |
| Transcription                               | 4.375490745 | GC    | 2.488724235 | 0.184606038 |
| Carbohydrate_Metabolism                     | 4.99294083  | GC    | 2.814233925 | 0.209959767 |
| Cardiovascular_Diseases                     | 2.035958329 | SG    | 0.985986517 | 0.268027376 |
| Lipid_Metabolism                            | 4.545255735 | SG    | 2.619697744 | 0.295210899 |
| Metabolism_of_Other_Amino_Acids             | 4.271376616 | SG    | 2.291396189 | 0.324181891 |
| Xenobiotics_Biodegradation_and_Metabolism   | 4.496846072 | SG    | 2.902661898 | 0.342424447 |
| Metabolism_of_Terpenoids_and_Polyketides    | 4.296175423 | SG    | 2.269947802 | 0.367748212 |
| Cell_Growth_and_Death                       | 3.713917566 | GC    | 1.558700336 | 0.367748212 |
| Endocrine_System                            | 3.527372976 | SG    | 1.756779182 | 0.38083648  |
| Immune_System                               | 2.795631874 | GC    | 1.17371724  | 0.387486557 |
| Transport_and_Catabolism                    | 3.486425081 | SG    | 1.714859753 | 0.414787292 |
| Metabolism_of_Cofactors_and_Vitamins        | 4.623789592 | SG    | 2.12838321  | 0.511009207 |
| Energy_Metabolism                           | 4.74498086  | SG    | 2.397991486 | 0.518865328 |
| Biosynthesis_of_Other_Secondary_Metabolites | 3.917090287 | GC    | 2.050218777 | 0.583882421 |
| Metabolism                                  | 4.390725834 | SG    | 2.063555933 | 0.626354361 |
| Excretory_System                            | 2.409043471 | SG    | 0.947490809 | 0.626354361 |
| Genetic_Information_Processing              | 4.43328122  | GC    | 2.362269017 | 0.635005891 |
| Infectious_Diseases                         | 3.622911159 | SG    | 1.507796709 | 0.661257222 |
| FoldingSorting_and_Degradation              | 4.379218611 | GC    | 2.157284235 | 0.760906727 |
| Glycan_Biosynthesis_and_Metabolism          | 4.341773955 | GC    | 2.374298784 | 0.770195871 |

|                        |             |    |             |             |
|------------------------|-------------|----|-------------|-------------|
| Immune_System_Diseases | 2.669055221 | GC | 0.793855795 | 0.779518102 |
| Poorly_Characterized   | 4.70475005  | SG | 2.23366203  | 0.855132141 |
| Cell_Communication     | 0.334780848 | SG | 1.121631148 | 0.922430266 |
| Sensory_System         | 0           | SG | 1.503228268 | 0.922430266 |

**Supplementary table 14: Differential predicted KEGG pathways (level 2) among SG, AG, IM and GC in Xi'an cohort**

| Predicted_function_level2                   | LogMaxMean  | Class | LDA score   | p value     |
|---------------------------------------------|-------------|-------|-------------|-------------|
| Signal_Transduction                         | 4.341301535 | SG    | 2.819974115 | 0.033371698 |
| Cell_Motility                               | 4.548710197 | SG    | 3.204195882 | 0.060348078 |
| Cellular_Processes_and_Signaling            | 4.597826188 | IM    | 2.689079609 | 0.137754649 |
| Nervous_System                              | 2.935003689 | GC    | 1.200757944 | 0.143234278 |
| Nucleotide_Metabolism                       | 4.551214475 | GC    | 2.891520932 | 0.160360354 |
| Amino_Acid_Metabolism                       | 5.013288985 | AG    | 2.979119168 | 0.214388784 |
| Signaling_Molecules_and_Interaction         | 3.290642423 | GC    | 1.869250419 | 0.234537197 |
| Enzyme_Families                             | 4.287618987 | GC    | 2.418485847 | 0.244439983 |
| Circulatory_System                          | 2.722988701 | SG    | 1.621936497 | 0.287242237 |
| Metabolic_Diseases                          | 2.950261188 | GC    | 1.119893911 | 0.29288015  |
| Neurodegenerative_Diseases                  | 3.537068016 | SG    | 2.207501451 | 0.339556946 |
| Carbohydrate_Metabolism                     | 4.99294083  | GC    | 2.914404581 | 0.340084882 |
| Replication_and_Repair                      | 4.888942808 | GC    | 3.112855999 | 0.343689428 |
| Translation                                 | 4.689204628 | GC    | 3.029685877 | 0.345477302 |
| Transport_and_Catabolism                    | 3.494219833 | AG    | 1.856569857 | 0.354818673 |
| Membrane_Transport                          | 5.08073651  | GC    | 2.967783556 | 0.393697215 |
| Digestive_System                            | 2.540320201 | GC    | 1.326780552 | 0.394360112 |
| Cancers                                     | 3.139457971 | SG    | 1.592557594 | 0.468365427 |
| Immune_System_Diseases                      | 2.679152086 | IM    | 1.076298306 | 0.46973127  |
| Transcription                               | 4.375490745 | GC    | 2.501138842 | 0.488016247 |
| Sensory_System                              | 0           | SG    | 1.632978658 | 0.518850243 |
| Cell_Communication                          | 0.334780848 | SG    | 1.17334048  | 0.531512252 |
| Endocrine_System                            | 3.534334963 | AG    | 1.885270239 | 0.533667038 |
| Metabolism_of_Other_Amino_Acids             | 4.271376616 | SG    | 2.289925007 | 0.549098887 |
| Poorly_Characterized                        | 4.706754675 | IM    | 2.380331098 | 0.558385389 |
| Cardiovascular_Diseases                     | 2.0564851   | AG    | 1.011648107 | 0.64353798  |
| Lipid_Metabolism                            | 4.546837528 | AG    | 2.666766483 | 0.646099458 |
| Environmental_Adaptation                    | 3.17669162  | IM    | 1.257465912 | 0.653955004 |
| Metabolism_of_Cofactors_and_Vitamins        | 4.627038987 | IM    | 2.317287749 | 0.65622049  |
| Metabolism_of_Terpenoids_and_Polyketides    | 4.298201879 | AG    | 2.363786746 | 0.693188424 |
| Energy_Metabolism                           | 4.74498086  | SG    | 2.524292531 | 0.736138473 |
| Cell_Growth_and_Death                       | 3.71446053  | AG    | 1.643818747 | 0.747396911 |
| Infectious_Diseases                         | 3.622911159 | SG    | 1.557057751 | 0.776371091 |
| Genetic_Information_Processing              | 4.43328122  | GC    | 2.54483708  | 0.777644001 |
| Immune_System                               | 2.795631874 | GC    | 1.246192817 | 0.78416457  |
| Metabolism                                  | 4.393493357 | AG    | 2.234533722 | 0.794730426 |
| Biosynthesis_of_Other_Secondary_Metabolites | 3.918634735 | AG    | 2.03435722  | 0.802284692 |
| Xenobiotics_Biodegradation_and_Metabolism   | 4.49891152  | AG    | 2.928936727 | 0.80523585  |
| FoldingSorting_and_Degradation              | 4.382175203 | IM    | 2.34671348  | 0.911201362 |
| Excretory_System                            | 2.419204404 | AG    | 1.022551828 | 0.971463947 |
| Glycan_Biosynthesis_and_Metabolism          | 4.341773955 | GC    | 2.468042209 | 0.996030104 |

SG: Superficial gastritis

AG: Atrophic gastritis

IM: Intestinal metaplasia

GC: Gastric cancer
