# Supplementary material for: Mucosal microbiome dysbiosis in gastric carcinogenesis
Source: PubMed Central journal article supplement — Gut. 2017 Aug 1;67(6):1024–32. doi: 10.1136/gutjnl-2017-314281 (PMC5969346; doi:10.1136/gutjnl-2017-314281), 2017-08-01
Supplement: gutjnl-2017-314281supp015.pdf [file gutjnl-2017-314281supp015.pdf]

**Supplementary table 15: Differential predicted KEGG pathways (level 3) between superficial gastritis (SG) and gastric cancer (GC) in Xi'an cohort**

| Predicted function level3                                                                   | LogMaxMean  | Class | LDA score   | p value     |
|---------------------------------------------------------------------------------------------|-------------|-------|-------------|-------------|
| Human Diseases Infectious Diseases Staphylococcus aureus infection                          | 2.354666706 | GC    | 1.652043936 | 0.000169216 |
| Organismal Systems Digestive System Carbohydrate digestion and absorption                   | 1.997080288 | GC    | 1.183967592 | 0.005314938 |
| Metabolism Metabolism of Other Amino Acids Phosphonate and phosphinate metabolism           | 2.763441764 | GC    | 0.989973959 | 0.007685493 |
| Metabolism Nucleotide Metabolism Purine metabolism                                          | 4.307627128 | GC    | 2.554221903 | 0.010963282 |
| Environmental Information Processing Signaling Molecules and Interaction Ion channels       | 2.3890563   | GC    | 1.326896872 | 0.014425316 |
| Metabolism Metabolism of Cofactors and Vitamins Thiamine metabolism                         | 3.597299018 | GC    | 1.853324163 | 0.014919696 |
| Metabolism Carbohydrate Metabolism Glycolysis Gluconeogenesis                               | 3.990531506 | GC    | 2.282534633 | 0.015953428 |
| Organismal Systems Immune System RIG I like receptor signaling pathway                      | 1.593244891 | GC    | 0.697096914 | 0.017049616 |
| Metabolism Metabolism of Other Amino Acids D Alanine metabolism                             | 3.003626265 | GC    | 1.608269331 | 0.017622091 |
| Metabolism Metabolism of Other Amino Acids Selenocompound metabolism                        | 3.560354588 | GC    | 1.610288115 | 0.018211345 |
| Metabolism Lipid Metabolism Glycerolipid metabolism                                         | 3.534412171 | GC    | 1.954468067 | 0.018817781 |
| Environmental Information Processing Membrane Transport Phosphotransferase system PTS       | 3.45023709  | GC    | 2.468648674 | 0.019441806 |
| Genetic Information Processing Replication and Repair Base excision repair                  | 3.635442266 | GC    | 1.737537735 | 0.025920214 |
| Genetic Information Processing Replication and Repair DNA repair and recombination proteins | 4.399123797 | GC    | 2.63536866  | 0.028459737 |
| Metabolism Enzyme Families Peptidases                                                       | 4.196929094 | GC    | 2.495430163 | 0.030269412 |
| Genetic Information Processing Transcription RNA polymerase                                 | 3.148868483 | GC    | 1.660370707 | 0.030269412 |
| Metabolism Glycan Biosynthesis and Metabolism Peptidoglycan biosynthesis                    | 3.834312046 | GC    | 2.27186173  | 0.033168958 |
| Metabolism Carbohydrate Metabolism Fructose and mannose metabolism                          | 3.828180886 | GC    | 2.472189549 | 0.034186879 |
| Metabolism Xenobiotics Biodegradation and Metabolism Drug metabolism of other enzymes       | 3.416089493 | GC    | 1.951181078 | 0.045918204 |
| Genetic Information Processing Replication and Repair Nucleotide excision repair            | 3.534016672 | GC    | 1.926910581 | 0.052955164 |
| Organismal Systems Nervous System Glutamatergic synapse                                     | 2.935003689 | GC    | 1.176939934 | 0.057594522 |
| Metabolism Metabolism of Other Amino Acids D Glutamine and D glutamate metabolism           | 3.106673555 | GC    | 1.351402943 | 0.059214158 |
| Environmental Information Processing Signal Transduction Calcium signaling pathway          | 0           | GC    | 0.109394279 | 0.060871415 |
| Unclassified Cellular Processes and Signaling Sporulation                                   | 3.264470661 | GC    | 2.266473623 | 0.064301288 |
| Unclassified Metabolism Others                                                              | 3.962213789 | GC    | 2.332932228 | 0.064301288 |
| Metabolism Metabolism of Cofactors and Vitamins One carbon pool by folate                   | 3.716056207 | GC    | 2.047802889 | 0.066075157 |
| Metabolism Nucleotide Metabolism Pyrimidine metabolism                                      | 4.183969008 | GC    | 2.590266518 | 0.067889155 |
| Genetic Information Processing Translation Aminoacyl tRNA biosynthesis                      | 4.023637975 | GC    | 2.366811488 | 0.069743915 |
| Metabolism Energy Metabolism Carbon fixation in photosynthetic organisms                    | 3.693263835 | GC    | 2.053894087 | 0.071640071 |
| Metabolism Carbohydrate Metabolism Galactose metabolism                                     | 3.650363824 | GC    | 2.418447267 | 0.075559124 |
| Metabolism Carbohydrate Metabolism Amino sugar and nucleotide sugar metabolism              | 4.03763298  | GC    | 2.571724467 | 0.075559124 |
| Metabolism Biosynthesis of Other Secondary Metabolites Butirosin and neomycin biosynthesis  | 2.707226999 | GC    | 1.3484665   | 0.077583297 |
| Environmental Information Processing Signaling Molecules and Interaction Bacterial toxins   | 3.030572967 | GC    | 1.70722668  | 0.081764142 |
| Genetic Information Processing Translation Ribosome                                         | 4.293044719 | GC    | 2.687426101 | 0.086125929 |
| Environmental Information Processing Membrane Transport Transporters                        | 4.774264584 | GC    | 3.045696195 | 0.086125929 |
| Metabolism Carbohydrate Metabolism Pentose phosphate pathway                                | 3.856390601 | GC    | 2.141383304 | 0.08837628  |
| Genetic Information Processing Replication and Repair Mismatch repair                       | 3.839748212 | GC    | 2.111969953 | 0.090673791 |
| Genetic Information Processing Replication and Repair Homologous recombination              | 3.896246287 | GC    | 2.194644854 | 0.100348246 |
| Metabolism Carbohydrate Metabolism Starch and sucrose metabolism                            | 3.785297819 | GC    | 2.440734451 | 0.102891151 |
| Metabolism Metabolism of Terpenoids and Polyketides Zeatin biosynthesis                     | 2.60156751  | GC    | 1.128121101 | 0.11638301  |
| Metabolism Metabolism of Terpenoids and Polyketides Prenyltransferases                      | 3.470206298 | GC    | 1.596967113 | 0.128146561 |
| Metabolism Metabolism of Terpenoids and Polyketides Terpenoid backbone biosynthesis         | 3.710042517 | GC    | 1.883983243 | 0.13122726  |
| Metabolism Amino Acid Metabolism Cysteine and methionine metabolism                         | 3.922455288 | GC    | 1.944328726 | 0.13122726  |
| Genetic Information Processing Translation Translation factors                              | 3.650055701 | GC    | 1.970557385 | 0.13756059  |
| Genetic Information Processing Replication and Repair DNA replication                       | 3.759050136 | GC    | 2.010685856 | 0.150931142 |
| Unclassified Poorly Characterized General function prediction only                          | 4.538430295 | GC    | 2.137359032 | 0.150931142 |
| Metabolism Amino Acid Metabolism Amino acid related enzymes                                 | 4.125930935 | GC    | 2.160905784 | 0.157977335 |
| Metabolism Glycan Biosynthesis and Metabolism Various types of N glycan biosynthesis        | 0.462694295 | GC    | 0.280261235 | 0.161592562 |
| Metabolism Glycan Biosynthesis and Metabolism Glycosyltransferases                          | 3.542607066 | GC    | 1.713623793 | 0.161592562 |

|                                                                                                             |             |    |             |             |
|-------------------------------------------------------------------------------------------------------------|-------------|----|-------------|-------------|
| Human Diseases Metabolic Diseases Type I diabetes mellitus                                                  | 2.705604935 | GC | 0.696503721 | 0.169009886 |
| Genetic Information Processing Replication and Repair Chromosome                                            | 4.135795137 | GC | 2.155268462 | 0.169009886 |
| Metabolism Energy Metabolism Photosynthesis                                                                 | 3.504589555 | GC | 1.858391257 | 0.176679745 |
| Metabolism Metabolism of Other Amino Acids Cyanoamino acid metabolism                                       | 3.353187999 | GC | 1.488540129 | 0.19698438  |
| Genetic Information Processing Translation RNA transport                                                    | 3.025607378 | GC | 1.423898369 | 0.201242621 |
| Genetic Information Processing Translation Ribosome Biogenesis                                              | 4.100740929 | GC | 2.269381495 | 0.201242621 |
| Genetic Information Processing FoldingSorting and Degradation Protein export                                | 3.730517881 | GC | 1.828292823 | 0.205567618 |
| Metabolism Amino Acid Metabolism Lysine biosynthesis                                                        | 3.802737568 | GC | 1.86401035  | 0.205567618 |
| Genetic Information Processing Replication and Repair DNA replication proteins                              | 4.004844038 | GC | 2.206284097 | 0.218947035 |
| Unclassified Cellular Processes and Signaling Germination                                                   | 1.894527709 | GC | 0.788087948 | 0.223542875 |
| Metabolism Energy Metabolism Photosynthesis proteins                                                        | 3.526937221 | GC | 1.819111456 | 0.228207307 |
| Metabolism Amino Acid Metabolism Alanineaspartate and glutamate metabolism                                  | 3.974932692 | GC | 1.735040609 | 0.228207307 |
| Unclassified Metabolism Carbohydrate metabolism                                                             | 3.065394607 | GC | 1.599931177 | 0.247557169 |
| Cellular Processes Cell Motility Cytoskeleton proteins                                                      | 3.381589833 | GC | 1.639888721 | 0.252569079 |
| Environmental Information Processing Signaling Molecules and Interaction G protein coupled receptors        | 0.004301906 | GC | 0.0906195   | 0.262803969 |
| Metabolism Lipid Metabolism Ether lipid metabolism                                                          | 1.992111814 | GC | 0.665808591 | 0.278687043 |
| Human Diseases Metabolic Diseases Type II diabetes mellitus                                                 | 2.584432661 | GC | 0.957602068 | 0.284123618 |
| Metabolism Glycan Biosynthesis and Metabolism Glycosphingolipid biosynthesis globo series                   | 2.708644564 | GC | 1.538011572 | 0.289631534 |
| Metabolism Metabolism of Terpenoids and Polyketides Biosynthesis of ansamycins                              | 2.857506249 | GC | 1.278346781 | 0.295210899 |
| Unclassified Genetic Information Processing Restriction enzyme                                              | 3.269909531 | GC | 1.917239874 | 0.300861803 |
| Metabolism Glycan Biosynthesis and Metabolism Other glycan degradation                                      | 3.154216741 | GC | 2.004404222 | 0.306584316 |
| Unclassified Metabolism Lipid metabolism                                                                    | 3.041443163 | GC | 1.328087025 | 0.306584316 |
| Unclassified Genetic Information Processing Translation proteins                                            | 3.90933824  | GC | 1.949555375 | 0.312378486 |
| Metabolism Energy Metabolism Photosynthesis antenna proteins                                                | 1.005354298 | GC | 0.635733064 | 0.324181891 |
| Metabolism Metabolism of Terpenoids and Polyketides Tetracycline biosynthesis                               | 3.150557765 | GC | 1.299076758 | 0.324181891 |
| Environmental Information Processing Signaling Molecules and Interaction ECM receptor interaction           | 0           | GC | 0.833285939 | 0.331832208 |
| Environmental Information Processing Signaling Molecules and Interaction CAM ligands                        | 0           | GC | 0.741722184 | 0.331832208 |
| Cellular Processes Transport and Catabolism Endocytosis                                                     | 0.630217205 | GC | 0.136610777 | 0.33627199  |
| Organismal Systems Immune System Fc gamma R mediated phagocytosis                                           | 0.630501164 | GC | 0.135806585 | 0.33627199  |
| Organismal Systems Endocrine System GnRH signaling pathway                                                  | 0.630217205 | GC | 0.136610777 | 0.33627199  |
| Genetic Information Processing Transcription Transcription factors                                          | 4.161355114 | GC | 2.351940737 | 0.354943779 |
| Metabolism Enzyme Families Cytochrome P450                                                                  | 0.814878893 | GC | 0.149452315 | 0.354943779 |
| Metabolism Lipid Metabolism Fatty acid biosynthesis                                                         | 3.706068449 | GC | 1.581191522 | 0.361310429 |
| Cellular Processes Cell Growth and Death Cell cycle Caulobacter                                             | 3.678807189 | GC | 1.62144667  | 0.37425696  |
| Metabolism Glycan Biosynthesis and Metabolism Glycosphingolipid biosynthesis ganglio series                 | 2.273682256 | GC | 1.127790454 | 0.38083648  |
| Metabolism Biosynthesis of Other Secondary Metabolites Streptomycin biosynthesis                            | 3.418148747 | GC | 1.658006288 | 0.387486557 |
| Metabolism Lipid Metabolism Secondary bile acid biosynthesis                                                | 2.12647182  | GC | 0.807281473 | 0.387486557 |
| Human Diseases Infectious Diseases Tuberculosis                                                             | 3.136840907 | GC | 1.103151206 | 0.387486557 |
| Metabolism Metabolism of Other Amino Acids D Arginine and D ornithine metabolism                            | 1.805555053 | GC | 0.504260787 | 0.39420695  |
| Metabolism Metabolism of Cofactors and Vitamins Nicotinate and nicotinamide metabolism                      | 3.601543769 | GC | 1.419526908 | 0.39420695  |
| Genetic Information Processing Transcription Basal transcription factors                                    | 1.342140132 | GC | 0.240643695 | 0.400997399 |
| Metabolism Lipid Metabolism Sphingolipid metabolism                                                         | 3.034913101 | GC | 1.79253249  | 0.407857616 |
| Metabolism Metabolism of Terpenoids and Polyketides Polyketide sugar unit biosynthesis                      | 3.166010709 | GC | 1.445950959 | 0.407857616 |
| Metabolism Carbohydrate Metabolism Pentose and glucuronate interconversions                                 | 3.586763126 | GC | 1.79012966  | 0.407857616 |
| Cellular Processes Transport and Catabolism Lysosome                                                        | 2.813925442 | GC | 1.568614724 | 0.421786093 |
| Organismal Systems Digestive System Protein digestion and absorption                                        | 2.066282602 | GC | 0.783609598 | 0.435989615 |
| Organismal Systems Immune System NOD like receptor signaling pathway                                        | 2.475245422 | GC | 0.8732678   | 0.435989615 |
| Metabolism Biosynthesis of Other Secondary Metabolites Tropanepiperidine and pyridine alkaloid biosynthesis | 3.068741448 | GC | 1.141576302 | 0.44319355  |
| Genetic Information Processing FoldingSorting and Degradation RNA degradation                               | 3.640830647 | GC | 1.530405687 | 0.450465035 |

|                                                                                                                 |             |    |             |             |
|-----------------------------------------------------------------------------------------------------------------|-------------|----|-------------|-------------|
| Metabolism_Biosynthesis_of_Other_Secondary_Metabolites_Flavone_and_flavonol biosynthesis                        | 1.830501282 | GC | 0.699762618 | 0.465208818 |
| Metabolism_Glycan_Biosynthesis_and_Metabolism_Glycosaminoglycan_degradati on                                    | 2.495659362 | GC | 1.276986397 | 0.465208818 |
| Unclassified_Genetic_Information_Processing_Replicationrecombination_and_repa ir_proteins                       | 3.900819583 | GC | 1.955393335 | 0.511009207 |
| Organismal_Systems_Endocrine_System_Insulin_signaling_pathway                                                   | 2.744145537 | GC | 1.242786571 | 0.526783376 |
| Genetic_Information_Processing_Transcription_Transcription_machinery                                            | 3.892658309 | GC | 1.760013579 | 0.559060606 |
| Metabolism_Energy_Metabolism_Methane_metabolism                                                                 | 4.02039548  | GC | 1.684408748 | 0.575551626 |
| Unclassified_Cellular_Processes_and_Signaling_Signal_transduction_mechanisms                                    | 3.651159977 | GC | 1.740629675 | 0.583882421 |
| Metabolism_Metabolism_of_Terpenoids_and_Polyketides_Biosynthesis_of_vanco mycin_group_antibiotics               | 2.69073683  | GC | 1.053765984 | 0.592268939 |
| Human_Diseases_Infectious_Diseases_Epithelial_cell_signaling_in_Helicobacter_p ylori_infection                  | 2.83520567  | GC | 1.384152971 | 0.592268939 |
| Metabolism_Glycan_Biosynthesis_and_Metabolism_Other_types_of_O_glycan_bio synthesis                             | 0           | GC | 0.71719879  | 0.604771474 |
| Metabolism_Xenobiotics_Biodegradation_and_Metabolism_Ethylbenzene_degradat ion                                  | 2.84953558  | GC | 1.246772643 | 0.609205613 |
| Metabolism_Biosynthesis_of_Other_Secondary_Metabolites_Caffeine_metabolism                                      | 1.396012086 | GC | 0.32490992  | 0.626354361 |
| Metabolism_Metabolism_of_Cofactors_and_Vitamins_Folate_biosynthesis                                             | 3.639935632 | GC | 1.615028014 | 0.626354361 |
| Genetic_Information_Processing_Folding_Sorting_and_Degradation_Proteasome                                       | 2.534634536 | GC | 0.761487114 | 0.635005891 |
| Human_Diseases_Neurodegenerative_Diseases_Prion_diseases                                                        | 2.095100632 | GC | 0.56434609  | 0.652458338 |
| Metabolism_Glycan_Biosynthesis_and_Metabolism_Glycosaminoglycan_biosynthe sis_chondroitin_sulfate               | 0           | GC | 0.840059845 | 0.678753082 |
| Organismal_Systems_Immune_System_Hematopoietic_cell_lineage                                                     | 0.666576271 | GC | 0.156033968 | 0.678995081 |
| Genetic_Information_Processing_FoldingSorting_and_Degradation_Chaperones_and folding_catalysts                  | 3.992356349 | GC | 1.683623535 | 0.678995081 |
| Metabolism_Biosynthesis_of_Other_Secondary_Metabolites_Isoquinoline_alkaloid biosynthesis                       | 2.764212665 | GC | 0.933898111 | 0.687931904 |
| Metabolism_Amino_Acid_Metabolism_Phenylalanine_tyrosine_and_tryptophan_bi osynthesis                            | 3.858364964 | GC | 1.802521035 | 0.687931904 |
| Metabolism_Amino_Acid_Metabolism_Tyrosine_metabolism                                                            | 3.61698413  | GC | 1.564683125 | 0.696912526 |
| Metabolism_Xenobiotics_Biodegradation_and_Metabolism_Dioxin_degradation                                         | 2.858602577 | GC | 1.010304657 | 0.696912526 |
| Environmental_Information_Processing_Signal_Transduction_Phosphatidylinositol signaling_system                  | 2.983186895 | GC | 0.852985546 | 0.715000655 |
| Organismal_Systems_Digestive_System_Mineral_absorption                                                          | 2.081178957 | GC | 0.590708768 | 0.724105864 |
| Metabolism_Xenobiotics_Biodegradation_and_Metabolism_111_Trichloro_22_bis_4_chlorophenyl_ethane_DDT_degradation | 1.435923206 | GC | 0.308135803 | 0.760906727 |
| Metabolism_Xenobiotics_Biodegradation_and_Metabolism_Polycyclic_aromatic_h ydrocarbon_degradation               | 3.174385786 | GC | 1.370845393 | 0.779518102 |
| Metabolism_Biosynthesis_of_Other_Secondary_Metabolites_Indole_alkaloid_biosy nthesis                            | 1.267113093 | GC | 0.236898553 | 0.807670565 |
| Metabolism_Xenobiotics_Biodegradation_and_Metabolism_Xylene_degradation                                         | 2.73687753  | GC | 1.103318779 | 0.817112326 |
| Human_Diseases_Cancers_Prostate_cancer                                                                          | 2.443225425 | GC | 0.791195064 | 0.826580701 |
| Metabolism_Glycan_Biosynthesis_and_Metabolism_Glycosphingolipid_biosynthesi s_lacto_and_neolacto_series         | 0           | GC | 0.065082011 | 0.836073162 |
| Organismal_Systems_Endocrine_System_Progesterone_mediated_oocyte_maturatio n                                    | 2.442934098 | GC | 0.790804743 | 0.836074359 |
| Organismal_Systems_Immune_System_Antigen_processing_and_presentation                                            | 2.442934098 | GC | 0.790804743 | 0.836074359 |
| Unclassified_Metabolism_Amino_acid_metabolism                                                                   | 3.284011632 | GC | 1.397524022 | 0.836074359 |
| Metabolism_Lipid_Metabolism_Primary_bile_acid_biosynthesis                                                      | 2.300771655 | GC | 0.739917123 | 0.855132141 |
| Human_Diseases_Immune_System_Diseases_Primary_immunodeficiency                                                  | 2.661698391 | GC | 0.723320383 | 0.855132141 |
| Metabolism_Biosynthesis_of_Other_Secondary_Metabolites_Betalain_biosynthesis                                    | 1.328781458 | GC | 0.273643785 | 0.874274808 |
| Metabolism_Xenobiotics_Biodegradation_and_Metabolism_Bisphenol_degradation                                      | 3.067114296 | GC | 1.47685778  | 0.874274808 |
| Human_Diseases_Immune_System_Diseases_Systemic_lupus_erythematosus                                              | 0.894287911 | GC | 0.146852147 | 0.893491348 |
| Metabolism_Lipid_Metabolism_Glycerophospholipid_metabolism                                                      | 3.72724515  | GC | 1.390405988 | 0.912770619 |
| Metabolism_Biosynthesis_of_Other_Secondary_Metabolites_Novobiocin_biosynth esis                                 | 3.083341046 | GC | 1.090532359 | 0.941782504 |
| Metabolism_Glycan_Biosynthesis_and_Metabolism_N_Glycan_biosynthesis                                             | 2.398744991 | GC | 0.832557621 | 0.951472249 |
| Organismal_Systems_Excretory_System_Vasopressin_regulated_water_reabsorptio n                                   | 0.78760129  | GC | 0.090817418 | 0.951472249 |
| Unclassified_Genetic_Information_Processing_Transcription_related_proteins                                      | 2.074410523 | GC | 0.726281656 | 0.961169175 |
| Metabolism_Lipid_Metabolism_Linoleic_acid_metabolism                                                            | 2.824432177 | GC | 1.310476821 | 0.970871848 |
| Cellular_Processes_Cell_Motility_Bacterial_chemotaxis                                                           | 3.840617644 | SG | 2.468742915 | 0.002979225 |

|                                                                                                     |             |    |             |             |
|-----------------------------------------------------------------------------------------------------|-------------|----|-------------|-------------|
| Environmental_Information_Processing_Signal_Transduction_Two_component_system                       | 4.313474505 | SG | 2.798393615 | 0.005728049 |
| Cellular Processes Cell Motility Bacterial motility proteins                                        | 4.254255092 | SG | 2.908229617 | 0.010222514 |
| Human Diseases Infectious Diseases Vibrio cholerae infection                                        | 1.426610468 | SG | 0.611627575 | 0.010222514 |
| Metabolism Energy Metabolism Carbon fixation pathways in prokaryotes                                | 4.0449781   | SG | 2.251185804 | 0.013479713 |
| Environmental_Information_Processing_Signaling_Molecules_and_Interaction_Cellular_antigens          | 2.816646417 | SG | 1.007149674 | 0.015428944 |
| Cellular Processes Cell Motility Flagellar assembly                                                 | 3.912363148 | SG | 2.600998378 | 0.019441806 |
| Unclassified Cellular Processes and Signaling Pores ion channels                                    | 3.705006177 | SG | 2.169261108 | 0.024338183 |
| Unclassified Metabolism Glycan biosynthesis and metabolism                                          | 2.842392954 | SG | 1.487302787 | 0.028459737 |
| Metabolism Lipid Metabolism Synthesis and degradation of ketone bodies                              | 3.214100986 | SG | 1.922524972 | 0.034186879 |
| Environmental_Information_Processing_Membrane_Transport_Bacterial_secretion_system                  | 3.879610403 | SG | 2.221102964 | 0.038529752 |
| Environmental Information Processing Membrane Transport Secretion system                            | 4.268911271 | SG | 2.713935792 | 0.04725887  |
| Human Diseases Infectious Diseases Pertussis                                                        | 2.491043873 | SG | 1.168582288 | 0.048632305 |
| Metabolism_Carbohydrate_Metabolism_Glyoxylate_and_dicarboxylate_metabolism                          | 3.876280669 | SG | 2.429326194 | 0.056011888 |
| Unclassified Metabolism Energy metabolism                                                           | 3.941938395 | SG | 2.114199421 | 0.057594522 |
| Unclassified Cellular Processes and Signaling Membrane and intracellular structural molecules       | 3.861859808 | SG | 2.283538503 | 0.059214158 |
| Metabolism_Glycan_Biosynthesis_and_Metabolism_Lipopolysaccharide_biosynthesis                       | 3.627507201 | SG | 2.244560941 | 0.060871415 |
| Human Diseases Neurodegenerative Diseases Parkinson s disease                                       | 2.785070177 | SG | 1.639487364 | 0.062566916 |
| Metabolism_Glycan_Biosynthesis_and_Metabolism_Lipopolysaccharide_biosynthesis_proteins              | 3.723423338 | SG | 2.281188309 | 0.071640071 |
| Organismal Systems Circulatory System Cardiac muscle contraction                                    | 2.722988701 | SG | 1.594470157 | 0.075559124 |
| Metabolism Carbohydrate Metabolism Citrate cycle TCA cycle                                          | 3.851938849 | SG | 2.082529908 | 0.075559124 |
| Metabolism_Metabolism_of_Cofactors_and_Vitamins_Ubiquinone_and_other_terpenoid_quinone_biosynthesis | 3.508307784 | SG | 1.878981496 | 0.075559124 |
| Metabolism Amino Acid Metabolism Lysine degradation                                                 | 3.654487612 | SG | 2.360925692 | 0.077583297 |
| Human Diseases Neurodegenerative Diseases Alzheimer s disease                                       | 3.080861886 | SG | 1.716925188 | 0.077583297 |
| Metabolism Amino Acid Metabolism Valineleucine and isoleucine degradation                           | 3.924488564 | SG | 2.628251533 | 0.079651423 |
| Metabolism Energy Metabolism Sulfur metabolism                                                      | 3.466148143 | SG | 1.563555137 | 0.081764142 |
| Metabolism Xenobiotics Biodegradation and Metabolism Atrazine degradation                           | 2.778604048 | SG | 1.490179246 | 0.081764142 |
| Human Diseases Neurodegenerative Diseases Huntington s disease                                      | 3.024859139 | SG | 1.682262641 | 0.086125929 |
| Metabolism Carbohydrate Metabolism Propanoate metabolism                                            | 3.974237354 | SG | 2.467123841 | 0.08837628  |
| Metabolism Lipid Metabolism alpha Linolenic acid metabolism                                         | 2.61281651  | SG | 1.393412216 | 0.090673791 |
| Unclassified_Genetic_Information_Processing_Protein_folding_and_associated_processing               | 3.917524694 | SG | 2.073434794 | 0.090673791 |
| Metabolism Metabolism of Other Amino Acids beta Alanine metabolism                                  | 3.672229876 | SG | 2.330086183 | 0.093019105 |
| Metabolism Carbohydrate Metabolism Butanoate metabolism                                             | 4.028809026 | SG | 2.478719699 | 0.100348246 |
| Metabolism_Xenobiotics_Biodegradation_and_Metabolism_Caprolactam_degradation                        | 3.378371846 | SG | 2.147717581 | 0.100348246 |
| Metabolism Amino Acid Metabolism Phenylalanine metabolism                                           | 3.509506105 | SG | 1.976660721 | 0.10548504  |
| Metabolism Energy Metabolism Oxidative phosphorylation                                              | 4.103483268 | SG | 2.387228644 | 0.108130545 |
| Metabolism Metabolism of Cofactors and Vitamins Biotin metabolism                                   | 3.211049918 | SG | 1.719056979 | 0.108130545 |
| Metabolism Amino Acid Metabolism Tryptophan metabolism                                              | 3.735092619 | SG | 2.389900512 | 0.108130545 |
| Cellular Processes Transport and Catabolism Peroxisome                                              | 3.392342152 | SG | 1.821329064 | 0.113578908 |
| Metabolism Metabolism of Terpenoids and Polyketides Geraniol degradation                            | 3.536003219 | SG | 2.316496224 | 0.11638301  |
| Metabolism Xenobiotics Biodegradation and Metabolism Toluene degradation                            | 3.281609202 | SG | 1.827483285 | 0.125122387 |
| Unclassified_Metabolism_Biosynthesis_and_biodegradation_of_secondary_metabolites                    | 2.945949326 | SG | 1.535969248 | 0.125122387 |
| Genetic_Information_Processing_FoldingSorting_and_Degradation_Sulfur_relay_system                   | 3.531393904 | SG | 1.793543105 | 0.128146561 |
| Environmental_Information_Processing_Signaling_Molecules_and_Interaction_Glycan_binding_proteins    | 0           | SG | 0.613494758 | 0.137557677 |
| Metabolism Lipid Metabolism Fatty acid metabolism                                                   | 3.824424972 | SG | 2.470404226 | 0.13756059  |
| Metabolism Lipid Metabolism Biosynthesis of unsaturated fatty acids                                 | 3.377037896 | SG | 1.911274821 | 0.140814386 |
| Metabolism Metabolism of Other Amino Acids Glutathione metabolism                                   | 3.602717397 | SG | 1.996607082 | 0.140814386 |
| Unclassified_Cellular_Processes_and_Signaling_Inorganic_ion_transport_and_metabolism                | 3.490543097 | SG | 1.879300057 | 0.147499101 |
| Metabolism_Biosynthesis_of_Other_Secondary_Metabolites_Penicillin_and_cephalosporin_biosynthesis    | 2.686931312 | SG | 1.121187973 | 0.161592562 |
| Human Diseases Infectious Diseases Vibrio cholerae pathogenic cycle                                 | 3.021555253 | SG | 1.430227908 | 0.165269907 |

|                                                                                                                  |             |    |             |             |
|------------------------------------------------------------------------------------------------------------------|-------------|----|-------------|-------------|
| Metabolism_Xenobiotics_Biodegradation_and_Metabolism_Metabolism_of_xenobiotics by cytochrome P450                | 3.151675591 | SG | 1.906950451 | 0.184606038 |
| Metabolism_Biosynthesis_of_Other_Secondary_Metabolites_Isoflavonoid_biosynthesis                                 | 0.749673091 | SG | 0.148123071 | 0.184606038 |
| Metabolism_Xenobiotics_Biodegradation_and_Metabolism_Drug_metabolism_cytochrome P450                             | 3.180052015 | SG | 1.924653223 | 0.192792487 |
| Metabolism_Amino Acid Metabolism Arginine and proline metabolism                                                 | 4.088454494 | SG | 2.225682073 | 0.19698438  |
| Metabolism_Metabolism_of_Terpenoids_and_Polyketides_Limonene_and_pinene_degradation                              | 3.533289089 | SG | 2.115338625 | 0.205567618 |
| Metabolism_Xenobiotics_Biodegradation_and_Metabolism_Styrene degradation                                         | 2.965226214 | SG | 1.611659637 | 0.209959767 |
| Metabolism_Xenobiotics_Biodegradation_and_Metabolism_Benzoate degradation                                        | 3.705555267 | SG | 2.233284849 | 0.21441945  |
| Organismal Systems Environmental Adaptation Plant pathogen interaction                                           | 3.164840704 | SG | 1.176537335 | 0.21441945  |
| Unclassified Cellular Processes and Signaling Cell motility and secretion                                        | 3.406027004 | SG | 1.760851517 | 0.218947035 |
| Organismal Systems Digestive System Fat digestion and absorption                                                 | 0           | SG | 0.998643895 | 0.232742055 |
| Human Diseases Cancers Pathways in cancer                                                                        | 2.772381235 | SG | 1.124630998 | 0.232940653 |
| Metabolism Enzyme Families Protein kinases                                                                       | 3.573861234 | SG | 1.692557771 | 0.232940653 |
| Metabolism Energy Metabolism Nitrogen metabolism                                                                 | 3.874219689 | SG | 1.644281357 | 0.247557169 |
| Organismal Systems Digestive System Pancreatic secretion                                                         | 0           | SG | 0.084318921 | 0.257651272 |
| Environmental Information Processing Signaling Molecules and Interaction Cytokine receptors                      | 0           | SG | 1.135767193 | 0.262861708 |
| Environmental Information Processing Signaling Molecules and Interaction Cytokine cytokine receptor interaction  | 0           | SG | 1.042349414 | 0.262861708 |
| Human Diseases Neurodegenerative Diseases Amyotrophic lateral sclerosis ALS                                      | 2.650647091 | SG | 1.137750042 | 0.268027376 |
| Metabolism_Metabolism_of_Terpenoids_and_Polyketides_Biosynthesis_of_type_II_polyketide products                  | 0.971654119 | SG | 0.370535631 | 0.273321678 |
| Organismal Systems Digestive System Bile secretion                                                               | 1.037989477 | SG | 0.21472584  | 0.278687043 |
| Metabolism Metabolism of Cofactors and Vitamins Riboflavin metabolism                                            | 3.415118052 | SG | 1.45418509  | 0.289631534 |
| Metabolism_Metabolism_of_Terpenoids_and_Polyketides_Biosynthesis_of siderophore group nonribosomal peptides      | 2.691023782 | SG | 1.216210639 | 0.289631534 |
| Metabolism Metabolism of Cofactors and Vitamins Retinol metabolism                                               | 2.84512693  | SG | 1.357783004 | 0.300861803 |
| Unclassified Metabolism Metabolism of cofactors and vitamins                                                     | 3.28557467  | SG | 1.713471671 | 0.300861803 |
| Metabolism Lipid Metabolism Arachidonic acid metabolism                                                          | 2.807734417 | SG | 1.157678879 | 0.300861803 |
| Metabolism Lipid Metabolism Lipid biosynthesis proteins                                                          | 3.869811646 | SG | 1.942727664 | 0.306584316 |
| Metabolism_Biosynthesis_of_Other_Secondary_Metabolites_beta_Lactam_resistance                                    | 2.49685356  | SG | 1.024050865 | 0.312378486 |
| Metabolism_Xenobiotics_Biodegradation_and_Metabolism_Nitrotoluene degradation                                    | 2.982957075 | SG | 1.640162164 | 0.318244342 |
| Organismal Systems Endocrine System Adipocytokine signaling pathway                                              | 2.909775538 | SG | 1.332420113 | 0.324181891 |
| Unclassified Cellular Processes and Signaling Cell division                                                      | 2.877897382 | SG | 1.03286346  | 0.324181891 |
| Metabolism_Metabolism_of_Terpenoids_and_Polyketides_Carotenoid_biosynthesis                                      | 2.316515915 | SG | 1.00190478  | 0.330191119 |
| Human Diseases Cancers Bladder cancer                                                                            | 2.055978872 | SG | 0.902336435 | 0.342424447 |
| Human Diseases Cardiovascular Diseases Hypertrophic cardiomyopathy HCM                                           | 1.413897699 | SG | 0.271994408 | 0.348648411 |
| Organismal Systems Endocrine System PPAR signaling pathway                                                       | 3.232950755 | SG | 1.671019743 | 0.354943779 |
| Human Diseases Infectious Diseases Chagas disease American trypanosomiasis                                       | 2.188122247 | SG | 0.868714935 | 0.38083648  |
| Metabolism_Metabolism_of_Cofactors_and_Vitamins_Porphyrin_and_chlorophyll_metabolism                             | 3.956246959 | SG | 1.995212507 | 0.39420695  |
| Cellular Processes Cell Growth and Death p53 signaling pathway                                                   | 1.926939442 | SG | 0.841904195 | 0.428853661 |
| Metabolism_Metabolism_of_Terpenoids_and_Polyketides_Sesquiterpenoid_biosynthesis                                 | 0.25867731  | SG | 0.09017638  | 0.435989615 |
| Metabolism_Xenobiotics_Biodegradation_and_Metabolism_Chlorocyclohexane_and_chlorobenzene degradation             | 2.925053771 | SG | 1.52295144  | 0.44319355  |
| Human Diseases Infectious Diseases African trypanosomiasis                                                       | 2.175647742 | SG | 0.823666388 | 0.450465035 |
| Metabolism_Amino Acid Metabolism Glycineserine and threonine metabolism                                          | 3.958954346 | SG | 1.80802485  | 0.450465035 |
| Unclassified Poorly Characterized Function unknown                                                               | 4.213285012 | SG | 2.220150669 | 0.450465035 |
| Human Diseases Cancers Renal cell carcinoma                                                                      | 2.374201285 | SG | 0.940017961 | 0.450465035 |
| Human Diseases Infectious Diseases Influenza A                                                                   | 1.911798809 | SG | 0.828846186 | 0.457803618 |
| Environmental Information Processing Signaling Molecules and Interaction Neuroactive ligand receptor interaction | 0           | SG | 0.091935021 | 0.457803618 |
| Environmental Information Processing Signal Transduction VEGF signaling pathway                                  | 0           | SG | 0.064022145 | 0.465208818 |
| Human Diseases Cardiovascular Diseases Viral myocarditis                                                         | 1.909889064 | SG | 0.827088495 | 0.465208818 |

|                                                                                                            |             |    |             |             |
|------------------------------------------------------------------------------------------------------------|-------------|----|-------------|-------------|
| Human Diseases Cancers Small cell lung cancer                                                              | 1.909438121 | SG | 0.825294722 | 0.472680136 |
| Metabolism_Metabolism_of_Terpenoids_and_Polyketides_Biosynthesis_of_type_II polyketide backbone            | 0.343790933 | SG | 0.103408615 | 0.472680136 |
| Metabolism_Metabolism_of_Terpenoids_and_Polyketides_Biosynthesis_of_12_14_ and 16 membered macrolides      | 1.043328552 | SG | 0.287005416 | 0.480217044 |
| Human Diseases Infectious Diseases Toxoplasmosis                                                           | 1.906153234 | SG | 0.821673892 | 0.487818991 |
| Human Diseases Cancers Colorectal cancer                                                                   | 1.906039695 | SG | 0.821823123 | 0.487818991 |
| Human Diseases Infectious Diseases Leishmaniasis                                                           | 0           | SG | 0.065697404 | 0.487818991 |
| Metabolism_Metabolism_of_Cofactors_and_Vitamins_Lipoic acid metabolism                                     | 2.716915778 | SG | 0.933816383 | 0.495485404 |
| Environmental_Information_Processing_Signal_Transduction_Wnt_signaling_path way                            | 0.22317251  | SG | 0.080295759 | 0.526783376 |
| Environmental_Information_Processing_Signal_Transduction_Notch_signaling_pat hway                          | 0.22317251  | SG | 0.080295759 | 0.526783376 |
| Human Diseases Cancers Chronic myeloid leukemia                                                            | 0.22317251  | SG | 0.080295759 | 0.526783376 |
| Metabolism_Biosynthesis_of_Other_Secondary_Metabolites_Clavulanic_acid_bios ynthesis                       | 0           | SG | 0.200777973 | 0.542802454 |
| Metabolism Lipid Metabolism Steroid biosynthesis                                                           | 2.074727301 | SG | 0.825835737 | 0.542802454 |
| Cellular Processes Cell Growth and Death Apoptosis                                                         | 2.026975584 | SG | 0.722073258 | 0.542802454 |
| Metabolism Carbohydrate Metabolism Inositol phosphate metabolism                                           | 3.29836506  | SG | 1.705313889 | 0.575551626 |
| Genetic Information Processing Translation mRNA surveillance pathway                                       | 0.720317587 | SG | 0.165443883 | 0.575551626 |
| Metabolism_Metabolism_of_Other_Amino_Acids_Taurine_and_hypotaurine_mета bolism                             | 3.157972902 | SG | 1.245732408 | 0.592268939 |
| Metabolism_Xenobiotics_Biodegradation_and_Metabolism_Fluorobenzoate_degrad ation                           | 2.581813561 | SG | 1.258670966 | 0.592268939 |
| Organismal_Systems_Excretory_System_Proximal_tubule_bicarbonate_reclamation                                | 2.397842404 | SG | 0.945225048 | 0.592268939 |
| Metabolism_Xenobiotics_Biodegradation_and_Metabolism_Chloroalkane_and_chl oroalkene degradation            | 3.402538439 | SG | 1.669155411 | 0.600710304 |
| Metabolism_Xenobiotics_Biodegradation_and_Metabolism_Aminobenzoate_degra dation                            | 3.541908778 | SG | 1.908282261 | 0.617753947 |
| Genetic_Information_Processing_FoldingSorting_and_Degradation_Protein_proces sing in endoplasmic reticulum | 2.765220904 | SG | 0.942854425 | 0.617753947 |
| Human Diseases Infectious Diseases Amoebiasis                                                              | 2.183716974 | SG | 0.919142246 | 0.617753947 |
| Metabolism Lipid Metabolism Fatty acid elongation in mitochondria                                          | 0.072733894 | SG | 0.096344332 | 0.652458338 |
| Metabolism Lipid Metabolism Steroid hormone biosynthesis                                                   | 2.273981737 | SG | 0.744991136 | 0.670103158 |
| Unclassified Cellular Processes and Signaling Electron transfer carriers                                   | 2.558388879 | SG | 1.141232866 | 0.678995081 |
| Organismal_Systems_Digestive_System_Salivary_secretion                                                     | 0           | SG | 0.147786764 | 0.678995081 |
| Organismal_Systems_Excretory_System_Endocrine_and_other_factor_regulated_ca lcium reabsorption             | 0           | SG | 0.147786764 | 0.678995081 |
| Organismal_Systems_Digestive_System_Gastric_acid_secretion                                                 | 0           | SG | 0.147786764 | 0.678995081 |
| Human Diseases Infectious Diseases Bacterial invasion of epithelial cells                                  | 1.431495171 | SG | 0.245722627 | 0.687931904 |
| Organismal_Systems_Endocrine_System_Melanogenesis                                                          | 0.859204885 | SG | 0.139666974 | 0.696912526 |
| Organismal_Systems_Environmental_Adaptation_Circadian_rhythm_plant                                         | 1.597965814 | SG | 0.449409231 | 0.724105864 |
| Unclassified Cellular Processes and Signaling Other transporters                                           | 3.350291333 | SG | 1.092791153 | 0.742432698 |
| Metabolism_Metabolism_of_Cofactors_and_Vitamins_Pantothenate_and_CoA_bio synthesis                         | 3.74473586  | SG | 1.259047583 | 0.742432698 |
| Metabolism Amino Acid Metabolism Histidine metabolism                                                      | 3.727262726 | SG | 1.632570953 | 0.751651923 |
| Cellular Processes Cell Growth and Death Meiosis yeast                                                     | 2.389968933 | SG | 1.062586931 | 0.788872152 |
| Human Diseases Infectious Diseases Shigellosis                                                             | 0           | SG | 0.084912547 | 0.798256737 |
| Organismal_Systems_Excretory_System_Aldosterone_regulated_sodium_reabsorpti on                             | 0           | SG | 0.273800552 | 0.798256737 |
| Metabolism Carbohydrate Metabolism C5 Branched dibasic acid metabolism                                     | 3.432633405 | SG | 1.505017517 | 0.807670565 |
| Metabolism Carbohydrate Metabolism Ascorbate and aldarate metabolism                                       | 3.119402286 | SG | 1.262305924 | 0.817112326 |
| Metabolism_Xenobiotics_Biodegradation_and_Metabolism_Naphthalene_degradati on                              | 3.3834943   | SG | 1.6410424   | 0.845591956 |
| Metabolism_Metabolism_of_Cofactors_and_Vitamins_Vitamin_B6_metabolism                                      | 3.240903732 | SG | 0.962855051 | 0.845591956 |
| Metabolism Carbohydrate Metabolism Pyruvate metabolism                                                     | 4.031493096 | SG | 1.579625972 | 0.855132141 |
| Genetic_Information_Processing_Replication_and_Repair_Non_homologous_end_j oining                          | 2.521830167 | SG | 1.093397343 | 0.855132141 |
| Genetic Information Processing Translation Ribosome biogenesis in eukaryotes                               | 2.742620155 | SG | 0.811558398 | 0.855132141 |
| Organismal_Systems_Endocrine_System_Renin_angiotensin_system                                               | 1.646269943 | SG | 0.384513138 | 0.864693548 |
| Unclassified Cellular Processes and Signaling Other ion coupled transporters                               | 4.075978669 | SG | 1.903709344 | 0.903123843 |
| Metabolism_Glycan_Biosynthesis_and_Metabolism_Glycosylphosphatidylinositol_ GPI_anchor_biosynthesis        | 0           | SG | 0.875257036 | 0.907954566 |

|                                                                                                            |             |    |             |             |
|------------------------------------------------------------------------------------------------------------|-------------|----|-------------|-------------|
| Metabolism_Biosynthesis_of_Other_Secondary_Metabolites_Flavonoid_biosynthesis                              | 2.142928426 | SG | 0.649400663 | 0.912770619 |
| Metabolism_Amino Acid Metabolism_Valineleucine and isoleucine biosynthesis                                 | 3.815114793 | SG | 1.66276195  | 0.912770619 |
| Genetic_Information_Processing_FoldingSorting_and_Degradation_Ubiquitin_system                             | 2.215427948 | SG | 0.672677627 | 0.912770619 |
| Environmental_Information_Processing_Membrane Transport_ABC transporters                                   | 4.524461699 | SG | 2.369919775 | 0.912770619 |
| Metabolism_Biosynthesis_of_Other_Secondary_Metabolites_Stilbenoiddiarylheptanoid and gingerol biosynthesis | 2.265455373 | SG | 0.926887966 | 0.912770619 |
| Human_Diseases_Cardiovascular_Diseases_Arrhythmogenic_right_ventricular_cardiomyopathy_ARVC                | 0           | SG | 0.051927194 | 0.922430266 |
| Organismal_Systems_Immune_System_Leukocyte transendothelial migration                                      | 0           | SG | 0.051927194 | 0.922430266 |
| Organismal_Systems_Sensory_System_Phototransduction_fly                                                    | 0           | SG | 0.051927194 | 0.922430266 |
| Cellular_Processes_Cell_Communication_Adherens junction                                                    | 0           | SG | 0.051927194 | 0.922430266 |
| Human_Diseases_Cardiovascular_Diseases_Dilated cardiomyopathy_DCM                                          | 0           | SG | 0.051927194 | 0.922430266 |
| Cellular_Processes_Cell_Motility_Regulation_of_actin_cytoskeleton                                          | 0           | SG | 0.051927194 | 0.922430266 |
| Human_Diseases_Infectious_Diseases_Pathogenic_Escherichia_coli_infection                                   | 0           | SG | 0.051927194 | 0.922430266 |
| Cellular_Processes_Transport_and_Catabolism_Phagosome                                                      | 0           | SG | 0.051927194 | 0.922430266 |
| Cellular_Processes_Cell_Communication_Tight junction                                                       | 0           | SG | 0.051927194 | 0.922430266 |
| Environmental_Information_Processing_Signal_Transduction_MAPK_signaling_pathway_yeast                      | 2.603748172 | SG | 0.943447959 | 0.941782504 |
| Cellular_Processes_Cell_Communication_Focal adhesion                                                       | 0           | SG | 0.051300857 | 0.961169175 |
| Metabolism_Biosynthesis_of_Other_Secondary_Metabolites_Phenylpropanoid_biosynthesis                        | 2.982608882 | SG | 1.327506415 | 0.970871848 |
| Unclassified_Metabolism_Nucleotide metabolism                                                              | 2.666842218 | SG | 1.096708777 | 0.990288698 |

LDA: Linear discriminant analysis
