# Supplementary material for: Mucosal microbiome dysbiosis in gastric carcinogenesis
Source: PubMed Central journal article supplement — Gut. 2017 Aug 1;67(6):1024–32. doi: 10.1136/gutjnl-2017-314281 (PMC5969346; doi:10.1136/gutjnl-2017-314281), 2017-08-01
Supplement: gutjnl-2017-314281supp016.pdf [file gutjnl-2017-314281supp016.pdf]

**Supplementary table 16: Differential predicted KEGG pathways (level 3) among SG, AG, IM and GC in Xi'an cohort**

| Predicted function level3                                                                           | LogMaxMean  | Class | LDA score   | p value     |
|-----------------------------------------------------------------------------------------------------|-------------|-------|-------------|-------------|
| Human Diseases Infectious Diseases Staphylococcus aureus infection                                  | 2.354666706 | GC    | 1.603385724 | 0.002171111 |
| Unclassified Cellular Processes and Signaling Pores ion channels                                    | 3.714736076 | IM    | 2.338335826 | 0.015411537 |
| Metabolism Metabolism of Other Amino Acids Phosphonate and phosphinate metabolism                   | 2.763441764 | GC    | 0.99060526  | 0.015712598 |
| Unclassified Cellular Processes and Signaling Membrane and intracellular structural molecules       | 3.870474197 | IM    | 2.447209598 | 0.022613659 |
| Cellular Processes Cell Motility Bacterial chemotaxis                                               | 3.840617644 | SG    | 2.436360855 | 0.023177371 |
| Environmental Information Processing Signal Transduction Two component system                       | 4.313474505 | SG    | 2.802071524 | 0.031986414 |
| Environmental Information Processing Signaling Molecules and Interaction Ion channels               | 2.3890563   | GC    | 1.246318215 | 0.04523401  |
| Organismal Systems Digestive System Carbohydrate digestion and absorption                           | 1.997080288 | GC    | 1.162701882 | 0.048360557 |
| Cellular Processes Cell Motility Bacterial motility proteins                                        | 4.254255092 | SG    | 2.900513244 | 0.049853968 |
| Unclassified Metabolism Glycan biosynthesis and metabolism                                          | 2.848512458 | IM    | 1.575464449 | 0.051955982 |
| Metabolism Lipid Metabolism Glycerolipid metabolism                                                 | 3.534412171 | GC    | 1.980126196 | 0.055946019 |
| Human Diseases Infectious Diseases Vibrio cholerae infection                                        | 1.426610468 | SG    | 0.61348176  | 0.059731747 |
| Metabolism Nucleotide Metabolism Purine metabolism                                                  | 4.307627128 | GC    | 2.545457386 | 0.063630123 |
| Metabolism Biosynthesis of Other Secondary Metabolites Clavulanic acid biosynthesis                 | 0           | AG    | 0.651935513 | 0.068760031 |
| Environmental Information Processing Membrane Transport Bacterial secretion system                  | 3.884793933 | IM    | 2.321672422 | 0.069462984 |
| Organismal Systems Immune System RIG I like receptor signaling pathway                              | 1.593244891 | GC    | 0.685729754 | 0.072384717 |
| Metabolism Metabolism of Cofactors and Vitamins Thiamine metabolism                                 | 3.597299018 | GC    | 1.853201571 | 0.073164276 |
| Metabolism Carbohydrate Metabolism Glycolysis Gluconeogenesis                                       | 3.990531506 | GC    | 2.270787992 | 0.077588947 |
| Metabolism Metabolism of Other Amino Acids D Alanine metabolism                                     | 3.003626265 | GC    | 1.601990995 | 0.080090242 |
| Environmental Information Processing Membrane Transport Secretion system                            | 4.272343102 | IM    | 2.758415887 | 0.084049128 |
| Environmental Information Processing Membrane Transport Phosphotransferase system PTS               | 3.45023709  | GC    | 2.443955725 | 0.088424383 |
| Metabolism Metabolism of Cofactors and Vitamins Ubiquinone and other terpenoid quinone biosynthesis | 3.513090376 | IM    | 2.001725472 | 0.089375561 |
| Metabolism Carbohydrate Metabolism Fructose and mannose metabolism                                  | 3.828180886 | GC    | 2.493194768 | 0.089790534 |
| Environmental Information Processing Signaling Molecules and Interaction Cellular antigens          | 2.819274177 | AG    | 1.147058371 | 0.095474134 |
| Metabolism Energy Metabolism Carbon fixation pathways in prokaryotes                                | 4.0449781   | SG    | 2.220274747 | 0.098465142 |
| Metabolism Metabolism of Terpenoids and Polyketides Biosynthesis of ansamycins                      | 2.857506249 | GC    | 1.443752652 | 0.100129566 |
| Genetic Information Processing Replication and Repair Base excision repair                          | 3.635442266 | GC    | 1.689896391 | 0.102390031 |
| Metabolism Metabolism of Cofactors and Vitamins Nicotinate and nicotinamide metabolism              | 3.601543769 | GC    | 1.41784056  | 0.110460296 |
| Metabolism Lipid Metabolism alpha Linolenic acid metabolism                                         | 2.61281651  | SG    | 1.406301115 | 0.122595118 |
| Unclassified Cellular Processes and Signaling Sporulation                                           | 3.264470661 | GC    | 2.424465591 | 0.125458176 |
| Metabolism Metabolism of Other Amino Acids Selenocompound metabolism                                | 3.560354588 | GC    | 1.557274883 | 0.126601598 |
| Cellular Processes Cell Motility Flagellar assembly                                                 | 3.912363148 | SG    | 2.565144473 | 0.127031142 |
| Genetic Information Processing Transcription RNA polymerase                                         | 3.148868483 | GC    | 1.651656581 | 0.12837518  |
| Environmental Information Processing Signaling Molecules and Interaction Glycan binding proteins    | 0           | AG    | 0.858525951 | 0.13015648  |
| Metabolism Energy Metabolism Carbon fixation in photosynthetic organisms                            | 3.693263835 | GC    | 2.085215961 | 0.134993134 |
| Metabolism Energy Metabolism Sulfur metabolism                                                      | 3.47101555  | IM    | 1.731251491 | 0.138330907 |
| Genetic Information Processing Replication and Repair DNA repair and recombination proteins         | 4.399123797 | GC    | 2.634289544 | 0.139181181 |
| Organismal Systems Nervous System Glutamatergic synapse                                             | 2.935003689 | GC    | 1.187521172 | 0.143234278 |
| Metabolism Energy Metabolism Methane metabolism                                                     | 4.02039548  | GC    | 2.070649472 | 0.145619977 |
| Metabolism Enzyme Families Peptidases                                                               | 4.196929094 | GC    | 2.507146165 | 0.151605513 |
| Metabolism Xenobiotics Biodegradation and Metabolism Toluene degradation                            | 3.286091215 | IM    | 1.890990739 | 0.151966517 |
| Metabolism Carbohydrate Metabolism Glyoxylate and dicarboxylate metabolism                          | 3.876280669 | SG    | 2.459734933 | 0.156212226 |
| Metabolism Biosynthesis of Other Secondary Metabolites Butirosin and neomycin biosynthesis          | 2.707226999 | GC    | 1.397850183 | 0.171217534 |
| Genetic Information Processing Translation Ribosome Biogenesis                                      | 4.100740929 | GC    | 2.248142844 | 0.172865078 |
| Metabolism Metabolism of Other Amino Acids Glutathione metabolism                                   | 3.603940996 | IM    | 2.100732081 | 0.17616025  |
| Genetic Information Processing Replication and Repair Nucleotide excision repair                    | 3.534016672 | GC    | 1.954452892 | 0.178434237 |
| Metabolism Lipid Metabolism Synthesis and degradation of ketone bodies                              | 3.214100986 | SG    | 1.952087133 | 0.181980225 |
| Metabolism Glycan Biosynthesis and Metabolism Peptidoglycan biosynthesis                            | 3.834312046 | GC    | 2.278805425 | 0.182782867 |
| Environmental Information Processing Membrane Transport Transporters                                | 4.774264584 | GC    | 3.13316271  | 0.193552311 |
| Metabolism Enzyme Families Cytochrome P450                                                          | 0.814878893 | GC    | 0.313813539 | 0.202336087 |

|                                                                                                  |             |    |             |             |
|--------------------------------------------------------------------------------------------------|-------------|----|-------------|-------------|
| Metabolism_Carbohydrate_Metabolism_Amino_sugar_and_nucleotide_sugar_metabolism                   | 4.03763298  | GC | 2.587121878 | 0.209939564 |
| Metabolism_Xenobiotics_Biodegradation_and_Metabolism_Drug_metabolism_others_enzymes              | 3.416089493 | GC | 1.977855047 | 0.213044841 |
| Metabolism_Carbohydrate_Metabolism_Pentose_phosphate_pathway                                     | 3.856390601 | GC | 2.180164837 | 0.214132235 |
| Unclassified_Metabolism_Energy_metabolism                                                        | 3.942318136 | AG | 2.092327106 | 0.223994058 |
| Metabolism_Metabolism_of_Cofactors_and_Vitamins_Riboflavin_metabolism                            | 3.423544135 | IM | 1.6679978   | 0.224030544 |
| Environmental_Information_Processing_Signal_Transduction_Calcium_signaling_pathway               | 0           | GC | 0.337623369 | 0.225645999 |
| Genetic_Information_Processing_Translation_Ribosome_biogenesis_in_eukaryotes                     | 2.755536909 | IM | 1.133760478 | 0.229510385 |
| Metabolism_Glycan_Biosynthesis_and_Metabolism_Other_types_of_O_glycan_biosynthesis               | 0           | IM | 1.12300774  | 0.229776708 |
| Metabolism_Energy_Metabolism_Oxidative_phosphorylation                                           | 4.104158878 | IM | 2.38661867  | 0.230586671 |
| Metabolism_Metabolism_of_Cofactors_and_Vitamins_One_carbon_pool_by_folate                        | 3.716056207 | GC | 2.054956086 | 0.231205024 |
| Unclassified_Cellular_Processes_and_Signaling_Germination                                        | 1.894527709 | GC | 1.061005631 | 0.231228963 |
| Environmental_Information_Processing_Signaling_Molecules_and_Interaction_Bacterial_toxins        | 3.030572967 | GC | 1.830011283 | 0.233748719 |
| Unclassified_Metabolism_Others                                                                   | 3.962213789 | GC | 2.372071151 | 0.236021981 |
| Metabolism_Amino_Acid_Metabolism_Valineleucine_and_isoleucine_degradation                        | 3.924488564 | SG | 2.662646599 | 0.236027888 |
| Metabolism_Glycan_Biosynthesis_and_Metabolism_Lipopolysaccharide_biosynthesis_proteins           | 3.724793746 | IM | 2.257301174 | 0.239512006 |
| Human_Diseases_Infectious_Diseases_Pertussis                                                     | 2.499963367 | IM | 1.203763758 | 0.242652043 |
| Metabolism_Carbohydrate_Metabolism_Citrate_cycle_TCA_cycle                                       | 3.85236603  | IM | 2.111021955 | 0.243796588 |
| Unclassified_Genetic_Information_Processing_Protein_folding_and_associated_processing            | 3.919176347 | IM | 2.054427476 | 0.244134362 |
| Metabolism_Carbohydrate_Metabolism_Galactose_metabolism                                          | 3.650363824 | GC | 2.442207635 | 0.245021675 |
| Metabolism_Amino_Acid_Metabolism_Lysine_degradation                                              | 3.654487612 | SG | 2.392368213 | 0.247231116 |
| Metabolism_Metabolism_of_Terpenoids_and_Polyketides_Carotenoid_biosynthesis                      | 2.35089129  | AG | 1.283594096 | 0.248429798 |
| Metabolism_Glycan_Biosynthesis_and_Metabolism_Lipopolysaccharide_biosynthesis                    | 3.630766428 | IM | 2.251887274 | 0.252378405 |
| Human_Diseases_Neurodegenerative_Diseases_Parkinson_s_disease                                    | 2.785070177 | SG | 1.640613166 | 0.253091361 |
| Metabolism_Glycan_Biosynthesis_and_Metabolism_Glycosaminoglycan_biosynthesis_chondroitin_sulfate | 0           | AG | 1.405726142 | 0.260728357 |
| Metabolism_Glycan_Biosynthesis_and_Metabolism_N_Glycan_biosynthesis                              | 2.421184522 | AG | 1.172210827 | 0.264652819 |
| Human_Diseases_Infectious_Diseases_Vibrio_cholerae_pathogenic_cycle                              | 3.022069475 | IM | 1.482378008 | 0.266729588 |
| Genetic_Information_Processing_Translation_Aminoacyl_tRNA_biosynthesis                           | 4.023637975 | GC | 2.388277345 | 0.270386414 |
| Unclassified_Metabolism_Lipid_metabolism                                                         | 3.041443163 | GC | 1.347922993 | 0.274080101 |
| Metabolism_Metabolism_of_Other_Amino_Acids_beta_Alanine_metabolism                               | 3.672229876 | SG | 2.359053071 | 0.275657633 |
| Genetic_Information_Processing_FoldingSorting_and_Degradation_Sulfur_relay_system                | 3.534225173 | IM | 1.855849223 | 0.275906031 |
| Metabolism_Carbohydrate_Metabolism_Propanoate_metabolism                                         | 3.974237354 | SG | 2.504925381 | 0.277079912 |
| Metabolism_Metabolism_of_Cofactors_and_Vitamins_Lipoic_acid_metabolism                           | 2.730454589 | AG | 1.185386134 | 0.27830761  |
| Metabolism_Carbohydrate_Metabolism_Butanoate_metabolism                                          | 4.028809026 | SG | 2.508053417 | 0.284630458 |
| Metabolism_Nucleotide_Metabolism_Pyrimidine_metabolism                                           | 4.183969008 | GC | 2.612901605 | 0.286381149 |
| Organismal_Systems_Circulatory_System_Cardiac_muscle_contraction                                 | 2.722988701 | SG | 1.586647141 | 0.287242237 |
| Human_Diseases_Metabolic_Diseases_Type_I_diabetes_mellitus                                       | 2.705604935 | GC | 0.79222417  | 0.289576207 |
| Metabolism_Biosynthesis_of_Other_Secondary_Metabolites_Isoflavonoid_biosynthesis                 | 0.786047532 | AG | 0.300874506 | 0.293439105 |
| Human_Diseases_Neurodegenerative_Diseases_Huntington_s_disease                                   | 3.024859139 | SG | 1.68915576  | 0.29957771  |
| Metabolism_Carbohydrate_Metabolism_Starch_and_sucrose_metabolism                                 | 3.785297819 | GC | 2.478607667 | 0.308996605 |
| Unclassified_Poorly_Characterized_Function_unknown                                               | 4.219186288 | IM | 2.445649109 | 0.309384004 |
| Cellular_Processes_Transport_and_Catabolism_Peroxisome                                           | 3.395929692 | AG | 1.886447927 | 0.311127503 |
| Metabolism_Xenobiotics_Biodegradation_and_Metabolism_Caprolactam_degradation                     | 3.378371846 | SG | 2.181814043 | 0.311151881 |
| Human_Diseases_Infectious_Diseases_Tuberculosis                                                  | 3.136840907 | GC | 1.124063487 | 0.312661512 |
| Metabolism_Metabolism_of_Other_Amino_Acids_Cyanoamino_acid_metabolism                            | 3.353187999 | GC | 1.635175417 | 0.313731965 |
| Metabolism_Metabolism_of_Other_Amino_Acids_D_Glutamine_and_D_glutamate_metabolism                | 3.106673555 | GC | 1.363473927 | 0.314770101 |
| Unclassified_Metabolism_Biosynthesis_and_biodegradation_of_secondary_metabolites                 | 2.945949326 | SG | 1.520447988 | 0.316047403 |
| Metabolism_Biosynthesis_of_Other_Secondary_Metabolites_Flavonoid_biosynthesis                    | 2.169655288 | AG | 0.966353793 | 0.317895363 |
| Metabolism_Amino_Acid_Metabolism_Cysteine_and_methionine_metabolism                              | 3.922455288 | GC | 1.95493553  | 0.320992318 |
| Genetic_Information_Processing_Translation_Ribosome                                              | 4.293044719 | GC | 2.709863671 | 0.334383079 |

|                                                                                                                 |             |    |             |             |
|-----------------------------------------------------------------------------------------------------------------|-------------|----|-------------|-------------|
| Organismal_Systems__Excretory_System__Vasopressin_regulated_water_reabsorption                                  | 0.78760129  | GC | 0.295252243 | 0.335064444 |
| Metabolism_Metabolism_of_Terpenoids_and_Polyketides_Geraniol_degradation                                        | 3.537571915 | AG | 2.34365802  | 0.33580812  |
| Human_Diseases_Neurodegenerative_Diseases_Alzheimer_s_disease                                                   | 3.080861886 | SG | 1.711265992 | 0.343509348 |
| Metabolism_Amino_Acid_Metabolism_Tryptophan_metabolism                                                          | 3.735092619 | SG | 2.427739504 | 0.34798229  |
| Metabolism_Lipid_Metabolism_Arachidonic_acid_metabolism                                                         | 2.809902933 | IM | 1.267603358 | 0.350538081 |
| Metabolism_Amino_Acid_Metabolism_Phenylalanine_metabolism                                                       | 3.509506105 | SG | 1.986491407 | 0.354349188 |
| Metabolism_Glycan_Biosynthesis_and_Metabolism_Glycosphingolipid_biosynthesis_lacto_and_neolacto_series          | 0           | AG | 0.2755618   | 0.355918071 |
| Genetic_Information_Processing_Transcription_Basal_transcription_factors                                        | 1.342140132 | GC | 0.33785066  | 0.356290635 |
| Metabolism_Xenobiotics_Biodegradation_and_Metabolism_Atrazine_degradation                                       | 2.778604048 | SG | 1.433249832 | 0.373257211 |
| Unclassified_Poorly_Characterized_General_function_prediction_only                                              | 4.538430295 | GC | 2.155230559 | 0.374563954 |
| Genetic_Information_Processing_Replication_and_Repair_Homologous_recombination                                  | 3.896246287 | GC | 2.211307975 | 0.377767908 |
| Metabolism_Lipid_Metabolism_Fatty_acid_metabolism                                                               | 3.827281674 | AG | 2.50003825  | 0.384892596 |
| Unclassified_Cellular_Processes_and_Signaling_Cell_motility_and_secretion                                       | 3.411013767 | IM | 1.77715345  | 0.3876578   |
| Metabolism_Glycan_Biosynthesis_and_Metabolism_Various_types_of_N_glycan_biosynthesis                            | 0.462694295 | GC | 0.26418388  | 0.392230664 |
| Metabolism_Energy_Metabolism_Photosynthesis                                                                     | 3.504589555 | GC | 1.873406892 | 0.394066094 |
| Metabolism_Xenobiotics_Biodegradation_and_Metabolism_Metabolism_of_xenobiotics_by_cytochrome_P450               | 3.161063743 | AG | 2.001311281 | 0.399970673 |
| Organismal_Systems_Immune_System_Fc_gamma_R_mediated_phagocytosis                                               | 0.844549132 | IM | 0.461379663 | 0.401395194 |
| Metabolism_Biosynthesis_of_Other_Secondary_Metabolites_Flavone_and_flavonol_biosynthesis                        | 1.833415942 | AG | 0.816185512 | 0.404282388 |
| Metabolism_Metabolism_of_Terpenoids_and_Polyketides_Terpenoid_backbone_biosynthesis                             | 3.710042517 | GC | 1.902086151 | 0.404469646 |
| Cellular_Processes_Transport_and_Catabolism_Endocytosis                                                         | 0.844116439 | IM | 0.459516505 | 0.404506751 |
| Organismal_Systems_Endocrine_System_GnRH_signaling_pathway                                                      | 0.844116439 | IM | 0.459516505 | 0.404506751 |
| Organismal_Systems_Digestive_System_Fat_digestion_and_absorption                                                | 0           | SG | 1.3309498   | 0.409365547 |
| Metabolism_Lipid_Metabolism_Sphingolipid_metabolism                                                             | 3.034913101 | GC | 1.867744463 | 0.410593421 |
| Metabolism_Metabolism_of_Terpenoids_and_Polyketides_Biosynthesis_of_12_14_and_16_membered_macrolides            | 1.06248157  | IM | 0.392811208 | 0.417405716 |
| Unclassified_Metabolism_Carbohydrate_metabolism                                                                 | 3.065394607 | GC | 1.683356972 | 0.419214399 |
| Metabolism_Energy_Metabolism_Photosynthesis_antenna_proteins                                                    | 1.005354298 | GC | 0.539656929 | 0.421896173 |
| Genetic_Information_Processing_Replication_and_Repair_Mismatch_repair                                           | 3.839748212 | GC | 2.141191075 | 0.422997215 |
| Metabolism_Amino_Acid_Metabolism_Arginine_and_proline_metabolism                                                | 4.088454494 | SG | 2.213670649 | 0.423766335 |
| Cellular_Processes_Cell_Motility_Cytoskeleton_proteins                                                          | 3.381589833 | GC | 1.738123691 | 0.423938301 |
| Metabolism_Energy_Metabolism_Photosynthesis_proteins                                                            | 3.526937221 | GC | 1.824407053 | 0.425367888 |
| Unclassified_Cellular_Processes_and_Signaling_Inorganic_ion_transport_and_metabolism                            | 3.492543272 | IM | 1.96386832  | 0.425917679 |
| Unclassified_Cellular_Processes_and_Signaling_Other_ion_coupled_transporters                                    | 4.081969808 | IM | 2.025173905 | 0.426924834 |
| Unclassified_Metabolism_Metabolism_of_cofactors_and_vitamins                                                    | 3.287615273 | IM | 1.812014472 | 0.43528676  |
| Unclassified_Genetic_Information_Processing_Translation_proteins                                                | 3.90933824  | GC | 1.909428586 | 0.436517989 |
| Environmental_Information_Processing_Signaling_Molecules_and_Interaction_Cytokine_receptors                     | 0           | AG | 1.444240419 | 0.445864338 |
| Environmental_Information_Processing_Signaling_Molecules_and_Interaction_Cytokine_cytokine_receptor_interaction | 0           | AG | 1.533846062 | 0.445864338 |
| Metabolism_Lipid_Metabolism_Steroid_hormone_biosynthesis                                                        | 2.277800324 | AG | 0.900459454 | 0.449047413 |
| Metabolism_Biosynthesis_of_Other_Secondary_Metabolites_Phenylpropanoid_biosynthesis                             | 2.998538731 | AG | 1.61470011  | 0.451231083 |
| Metabolism_Metabolism_of_Terpenoids_and_Polyketides_Zeatin_biosynthesis                                         | 2.60156751  | GC | 1.167712987 | 0.462061862 |
| Metabolism_Glycan_Biosynthesis_and_Metabolism_Other_glycan_degradation                                          | 3.154216741 | GC | 2.045487615 | 0.463055905 |
| Metabolism_Lipid_Metabolism_Biosynthesis_of_unsaturated_fatty_acids                                             | 3.379030576 | AG | 1.976849784 | 0.463263777 |
| Metabolism_Xenobiotics_Biodegradation_and_Metabolism_Styrene_degradation                                        | 2.965226214 | SG | 1.671724562 | 0.464721713 |
| Genetic_Information_Processing_Translation_Translation_factors                                                  | 3.650055701 | GC | 1.999592478 | 0.466356675 |
| Human_Diseases_Infectious_Diseases_Bacterial_invasion_of_epithelial_cells                                       | 1.431495171 | SG | 0.367546291 | 0.467123814 |
| Organismal_Systems_Immune_System_Hematopoietic_cell_lineage                                                     | 0.666576271 | GC | 0.363320438 | 0.468197231 |
| Metabolism_Metabolism_of_Terpenoids_and_Polyketides_Polyketide_sugar_unit_biosynthesis                          | 3.173097195 | AG | 1.501349008 | 0.471960219 |
| Metabolism_Glycan_Biosynthesis_and_Metabolism_Glycosphingolipid_biosynthesis_globo_series                       | 2.708644564 | GC | 1.554145553 | 0.473957412 |
| Metabolism_Amino_Acid_Metabolism_Valineleucine_and_isoleucine_biosynthesis                                      | 3.823170985 | AG | 1.845909101 | 0.4750191   |
| Unclassified_Cellular_Processes_and_Signaling_Cell_division                                                     | 2.883730683 | IM | 1.196127001 | 0.482696981 |
| Metabolism_Xenobiotics_Biodegradation_and_Metabolism_Drug_metabolism_cytochrome_P450                            | 3.189553614 | AG | 2.017288671 | 0.485618708 |
| Cellular_Processes_Transport_and_Catabolism_Lysosome                                                            | 2.813925442 | GC | 1.62322817  | 0.487643374 |
| Metabolism_Metabolism_of_Cofactors_and_Vitamins_Biotin_metabolism                                               | 3.211049918 | SG | 1.642207467 | 0.488904951 |

|                                                                                                             |             |    |             |             |
|-------------------------------------------------------------------------------------------------------------|-------------|----|-------------|-------------|
| Metabolism_Glycan_Biosynthesis_and_Metabolism_Glycosaminoglycan_degradation                                 | 2.495659362 | GC | 1.28738912  | 0.497903923 |
| Human_Diseases_Immune_System_Diseases_Primary_immunodeficiency                                              | 2.669408185 | IM | 0.984253887 | 0.504640585 |
| Metabolism_Carbohydrate_Metabolism_C5_Branched_dibasic_acid_metabolism                                      | 3.445780501 | AG | 1.731233272 | 0.511760369 |
| Metabolism_Metabolism_of_Terpenoids_and_Polyketides_Prenyltransferases                                      | 3.470206298 | GC | 1.606551    | 0.51254798  |
| Metabolism_Carbohydrate_Metabolism_Pentose_and_glucuronate_interconversions                                 | 3.586763126 | GC | 1.965598875 | 0.515091761 |
| Metabolism_Glycan_Biosynthesis_and_Metabolism_Glycosyltransferases                                          | 3.542607066 | GC | 1.70843426  | 0.51734255  |
| Human_Diseases_Cardiovascular_Diseases_Arrhythmogenic_right_ventricular_cardio_myopathy_ARVC                | 0           | SG | 0.195963114 | 0.518850243 |
| Organismal_Systems_Immune_System_Leukocyte_transendothelial_migration                                       | 0           | SG | 0.195963114 | 0.518850243 |
| Organismal_Systems_Sensory_System_Phototransduction_fly                                                     | 0           | SG | 0.195963114 | 0.518850243 |
| Cellular_Processes_Cell_Communication_Adherens_junction                                                     | 0           | SG | 0.195963114 | 0.518850243 |
| Human_Diseases_Cardiovascular_Diseases_Dilated_cardiomyopathy_DCM                                           | 0           | SG | 0.195963114 | 0.518850243 |
| Cellular_Processes_Cell_Motility_Regulation_of_actin_cytoskeleton                                           | 0           | SG | 0.195963114 | 0.518850243 |
| Human_Diseases_Infectious_Diseases_Pathogenic_Escherichia_coli_infection                                    | 0           | SG | 0.195963114 | 0.518850243 |
| Cellular_Processes_Transport_and_Catabolism_Phagosome                                                       | 0           | SG | 0.195963114 | 0.518850243 |
| Cellular_Processes_Cell_Communication_Tight_junction                                                        | 0           | SG | 0.195963114 | 0.518850243 |
| Cellular_Processes_Cell_Communication_Focal_adhesion                                                        | 0           | SG | 0.654953772 | 0.519841555 |
| Genetic_Information_Processing_Replication_and_Repair_DNA_replication                                       | 3.759050136 | GC | 2.02763278  | 0.520275148 |
| Metabolism_Energy_Metabolism_Nitrogen_metabolism                                                            | 3.875725264 | IM | 1.693240953 | 0.522105754 |
| Organismal_Systems_Endocrine_System_Adipocytokine_signaling_pathway                                         | 2.922433856 | AG | 1.503642942 | 0.524925348 |
| Metabolism_Metabolism_of_Terpenoids_and_Polyketides_Biosynthesis_of_vancomycin_group_antibiotics            | 2.699837575 | AG | 1.15902716  | 0.525136681 |
| Metabolism_Amino_Acid_Metabolism_Lysine_biosynthesis                                                        | 3.802737568 | GC | 1.91072444  | 0.525602861 |
| Genetic_Information_Processing_FoldingSorting_and_Degradation_Protein_processing_in_endoplasmic_reticulum   | 2.767099553 | AG | 1.050203982 | 0.542255759 |
| Metabolism_Metabolism_of_Cofactors_and_Vitamins_Folate_biosynthesis                                         | 3.641994506 | IM | 1.840283452 | 0.544898178 |
| Metabolism_Xenobiotics_Biodegradation_and_Metabolism_Ethylbenzene_degradation                               | 2.84953558  | GC | 1.333168865 | 0.545537184 |
| Metabolism_Xenobiotics_Biodegradation_and_Metabolism_Benzoate_degradation                                   | 3.709437302 | AG | 2.267875097 | 0.546384793 |
| Metabolism_Lipid_Metabolism_Steroid_biosynthesis                                                            | 2.096903345 | AG | 0.987465425 | 0.546702321 |
| Human_Diseases_Cardiovascular_Diseases_Hypertrophic_cardiomyopathy_HCM                                      | 1.437842101 | IM | 0.455942844 | 0.549627326 |
| Organismal_Systems_Digestive_System_Bile_secretion                                                          | 1.059648325 | AG | 0.338056996 | 0.55551366  |
| Metabolism_Metabolism_of_Terpenoids_and_Polyketides_Biosynthesis_of_type_II_polyketide_products             | 0.988050439 | AG | 0.491667282 | 0.56059266  |
| Genetic_Information_Processing_Replication_and_Repair_Chromosome                                            | 4.135795137 | GC | 2.183679515 | 0.573187511 |
| Metabolism_Metabolism_of_Other_Amino_Acids_D_Arginine_and_D_ornithine_metabolism                            | 1.806395878 | AG | 0.581854474 | 0.57422566  |
| Metabolism_Biosynthesis_of_Other_Secondary_Metabolites_beta_Lactam_resistance                               | 2.503295062 | AG | 1.134667296 | 0.575219995 |
| Metabolism_Biosynthesis_of_Other_Secondary_Metabolites_Isoquinoline_alkaloid_biosynthesis                   | 2.764212665 | GC | 1.007021299 | 0.575348176 |
| Metabolism_Amino_Acid_Metabolism_Amino_acid_related_enzymes                                                 | 4.125930935 | GC | 2.19095709  | 0.579378272 |
| Metabolism_Amino_Acid_Metabolism_Glycineserine_and_threonine_metabolism                                     | 3.961152322 | IM | 1.935839198 | 0.585459008 |
| Genetic_Information_Processing_Transcription_Transcription_machinery                                        | 3.893369535 | AG | 1.85586164  | 0.588673644 |
| Cellular_Processes_Cell_Growth_and_Death_p53_signaling_pathway                                              | 1.956451944 | AG | 0.991093668 | 0.59148154  |
| Metabolism_Biosynthesis_of_Other_Secondary_Metabolites_Streptomycin_biosynthesis                            | 3.420158913 | AG | 1.652877867 | 0.599677016 |
| Metabolism_Metabolism_of_Terpenoids_and_Polyketides_Biosynthesis_of_siderophore_group_nonribosomal_peptides | 2.700517155 | IM | 1.32949009  | 0.601117935 |
| Metabolism_Xenobiotics_Biodegradation_and_Metabolism_Nitrotoluene_degradation                               | 2.982957075 | SG | 1.572436762 | 0.601806265 |
| Human_Diseases_Cancers_Bladder_cancer                                                                       | 2.063361256 | IM | 0.973130244 | 0.605497793 |
| Human_Diseases_Cancers_Renal_cell_carcinoma                                                                 | 2.374201285 | SG | 0.993058795 | 0.605719084 |
| Genetic_Information_Processing_FoldingSorting_and_Degradation_Protein_export                                | 3.730517881 | GC | 1.846545405 | 0.606990468 |
| Organismal_Systems_Endocrine_System_PPAR_signaling_pathway                                                  | 3.240804954 | AG | 1.781033111 | 0.607334674 |
| Genetic_Information_Processing_Translation_RNA_transport                                                    | 3.025607378 | GC | 1.323500558 | 0.608336963 |
| Unclassified_Metabolism_Amino_acid_metabolism                                                               | 3.289271579 | AG | 1.582766432 | 0.608371909 |
| Unclassified_Genetic_Information_Processing_Restriction_enzyme                                              | 3.269909531 | GC | 2.107111319 | 0.608683713 |
| Metabolism_Biosynthesis_of_Other_Secondary_Metabolites_Penicillin_and_cephalosporin_biosynthesis            | 2.692731702 | AG | 1.269557737 | 0.60984603  |
| Metabolism_Glycan_Biosynthesis_and_Metabolism_Glycosphingolipid_biosynthesis_ganglio_series                 | 2.273682256 | GC | 1.12501675  | 0.610483724 |
| Metabolism_Metabolism_of_Terpenoids_and_Polyketides_Limonene_and_pinene_degradation                         | 3.534020135 | AG | 2.132015813 | 0.613622863 |

|                                                                                                                 |             |    |             |             |
|-----------------------------------------------------------------------------------------------------------------|-------------|----|-------------|-------------|
| Metabolism_Amino Acid Metabolism_Alanineaspartate_and glutamate metabolism                                      | 3.974932692 | GC | 1.771192868 | 0.619989426 |
| Metabolism Metabolism of Cofactors and Vitamins Vitamin B6 metabolism                                           | 3.246467829 | IM | 1.18700622  | 0.6228362   |
| Environmental_Information_Processing_Signaling_Molecules_and_Interaction_G_protein coupled receptors            | 0.004301906 | GC | 0.23062262  | 0.623609773 |
| Metabolism Metabolism of Cofactors and Vitamins Retinol metabolism                                              | 2.854590028 | AG | 1.514117895 | 0.636965879 |
| Environmental_Information_Processing_Signaling_Molecules_and_Interaction_ECM_receptor interaction               | 0           | AG | 1.31692428  | 0.637319445 |
| Environmental_Information_Processing_Signaling_Molecules_and_Interaction_CAM_ligands                            | 0           | AG | 1.297089953 | 0.637319445 |
| Organismal Systems Environmental Adaptation Plant pathogen interaction                                          | 3.164840704 | SG | 1.24712007  | 0.647098979 |
| Human_Diseases_Infectious_Diseases_Chagas_disease_American trypanosomiasis                                      | 2.19591124  | IM | 0.997680537 | 0.653681618 |
| Genetic_Information_Processing_Replication_and_Repair_DNA_replication_proteins                                  | 4.004844038 | GC | 2.271831743 | 0.657615088 |
| Organismal Systems Digestive System Protein digestion and absorption                                            | 2.066282602 | GC | 0.805840087 | 0.66600902  |
| Metabolism Amino Acid Metabolism Histidine metabolism                                                           | 3.73529213  | AG | 1.838758654 | 0.672310848 |
| Human Diseases Infectious Diseases Influenza A                                                                  | 1.943111868 | AG | 0.987411929 | 0.675069167 |
| Human Diseases Cardiovascular Diseases Viral myocarditis                                                        | 1.940998208 | AG | 0.983943823 | 0.680164169 |
| Human Diseases Cancers Pathways in cancer                                                                       | 2.772381235 | SG | 1.077617022 | 0.681100389 |
| Metabolism Carbohydrate Metabolism Inositol phosphate metabolism                                                | 3.300499269 | IM | 1.786016604 | 0.681242755 |
| Genetic_Information_Processing_Translation mRNA surveillance pathway                                            | 0.720317587 | SG | 0.297419445 | 0.682219328 |
| Human Diseases Cancers Small cell lung cancer                                                                   | 1.941035759 | AG | 0.985161981 | 0.687935449 |
| Organismal Systems Digestive System Pancreatic secretion                                                        | 0           | AG | 0.71184298  | 0.688881381 |
| Metabolism_Metabolism_of_Other_Amino_Acids_Taurine_and_hypotaurine_metabolism                                   | 3.15853664  | IM | 1.315170278 | 0.689890978 |
| Human Diseases Metabolic Diseases Type II diabetes mellitus                                                     | 2.584432661 | GC | 0.8871118   | 0.696094201 |
| Human Diseases Infectious Diseases Toxoplasmosis                                                                | 1.938010823 | AG | 0.982562893 | 0.698798351 |
| Human Diseases Cancers Colorectal cancer                                                                        | 1.937869873 | AG | 0.982414938 | 0.699750669 |
| Metabolism_Xenobiotics_Biodegradation_and_Metabolism_111 Trichloro_22_bis_4_chlorophenyl ethane DDT degradation | 1.435923206 | GC | 0.414606043 | 0.7032992   |
| Environmental_Information_Processing_Signal_Transduction_Phosphatidylinositol signaling system                  | 2.986624507 | IM | 1.082610913 | 0.708944981 |
| Metabolism Lipid Metabolism Fatty acid elongation in mitochondria                                               | 0.16245111  | IM | 0.342507063 | 0.712285585 |
| Metabolism Lipid Metabolism Lipid biosynthesis proteins                                                         | 3.871954398 | AG | 2.041735508 | 0.714175837 |
| Metabolism_Metabolism_of_Cofactors_and_Vitamins_Pantothenate_and_CoA_biosynthesis                               | 3.746674555 | IM | 1.361851832 | 0.714275804 |
| Metabolism Enzyme Families Protein kinases                                                                      | 3.575434392 | IM | 1.741139521 | 0.721485621 |
| Unclassified Cellular Processes and Signaling Other transporters                                                | 3.354339941 | AG | 1.333944312 | 0.722105581 |
| Human_Diseases_Neurodegenerative_Diseases_Amyotrophic_lateral_sclerosis_ALS                                     | 2.650647091 | SG | 1.16961354  | 0.724173296 |
| Cellular Processes Cell Growth and Death Cell cycle Caulobacter                                                 | 3.678807189 | GC | 1.683386431 | 0.729138513 |
| Metabolism_Glycan_Biosynthesis_and_Metabolism_Glycosylphosphatidylinositol_GPI_anchor biosynthesis              | 0           | AG | 1.532690319 | 0.738913701 |
| Metabolism_Biosynthesis_of_Other_Secondary_Metabolites_Stilbenoiddiarylheptanoid and gingerol biosynthesis      | 2.274825296 | AG | 1.0933637   | 0.743307602 |
| Organismal Systems Endocrine System Insulin signaling pathway                                                   | 2.744145537 | GC | 1.328019612 | 0.744912454 |
| Metabolism_Metabolism_of_Terpenoids_and_Polyketides_Tetracycline_biosynthesis                                   | 3.150557765 | GC | 1.412191047 | 0.765831995 |
| Organismal Systems Environmental Adaptation Circadian rhythm plant                                              | 1.628031719 | AG | 0.614456861 | 0.769762364 |
| Human Diseases Infectious Diseases Amoebiasis                                                                   | 2.183716974 | SG | 0.861390652 | 0.775875205 |
| Genetic_Information_Processing_Transcription Transcription factors                                              | 4.161355114 | GC | 2.288379442 | 0.779533255 |
| Human Diseases Infectious Diseases African trypanosomiasis                                                      | 2.180251462 | IM | 0.93347913  | 0.779667547 |
| Unclassified Genetic Information Processing Transcription related proteins                                      | 2.088651476 | IM | 0.749492952 | 0.781846962 |
| Metabolism Lipid Metabolism Ether lipid metabolism                                                              | 2.008486576 | AG | 0.821099798 | 0.785825617 |
| Cellular Processes Cell Growth and Death Apoptosis                                                              | 2.059218405 | AG | 0.885796497 | 0.78723654  |
| Organismal Systems Immune System NOD like receptor signaling pathway                                            | 2.475245422 | GC | 1.018580071 | 0.791872479 |
| Metabolism_Metabolism_of_Cofactors_and_Vitamins_Porphyrin_and_chlorophyll metabolism                            | 3.956246959 | SG | 1.917552418 | 0.795449918 |
| Genetic_Information_Processing_FoldingSorting_and_Degradation_Chaperones_and_folding catalysts                  | 3.996878543 | IM | 2.003409124 | 0.797901942 |
| Metabolism_Xenobiotics_Biodegradation_and_Metabolism_Xylene degradation                                         | 2.73687753  | GC | 1.254411383 | 0.803456122 |
| Environmental_Information_Processing_Signal_Transduction_Wnt_signaling pathway                                  | 0.271675529 | AG | 0.149909224 | 0.824277727 |
| Environmental_Information_Processing_Signal_Transduction_Notch_signaling pathway                                | 0.271675529 | AG | 0.149909224 | 0.824277727 |
| Human Diseases Cancers Chronic myeloid leukemia                                                                 | 0.271675529 | AG | 0.149909224 | 0.824277727 |

|                                                                                                                  |             |    |             |             |
|------------------------------------------------------------------------------------------------------------------|-------------|----|-------------|-------------|
| Human Diseases Infectious Diseases Shigellosis                                                                   | 0           | SG | 0.635267552 | 0.824925142 |
| Metabolism_Xenobiotics_Biodegradation_and_Metabolism_Aminobenzoate degradation                                   | 3.548617297 | AG | 2.057260118 | 0.838404668 |
| Organismal Systems Digestive System Salivary secretion                                                           | 0           | SG | 1.045282023 | 0.839271229 |
| Organismal Systems_Excretory_System_Endocrine_and_other_factor_regulated_calcium reabsorption                    | 0           | SG | 1.045282023 | 0.839271229 |
| Organismal Systems Digestive System Gastric acid secretion                                                       | 0           | SG | 1.045282023 | 0.839271229 |
| Organismal Systems Digestive System Mineral absorption                                                           | 2.109747246 | IM | 0.881958656 | 0.844374448 |
| Organismal Systems Endocrine System Melanogenesis                                                                | 0.912106966 | AG | 0.293819795 | 0.844382641 |
| Metabolism Lipid Metabolism Primary bile acid biosynthesis                                                       | 2.308906505 | AG | 0.748530479 | 0.845850989 |
| Metabolism Lipid Metabolism Secondary bile acid biosynthesis                                                     | 2.12647182  | GC | 0.836162029 | 0.849178787 |
| Metabolism_Metabolism_of_Terpenoids_and_Polyketides_Biosynthesis_of_type_II_polyketide backbone                  | 0.416454568 | AG | 0.375851081 | 0.850869719 |
| Metabolism Lipid Metabolism Fatty acid biosynthesis                                                              | 3.706068449 | GC | 1.530420567 | 0.853097095 |
| Metabolism Lipid Metabolism Glycerophospholipid metabolism                                                       | 3.72952011  | IM | 1.612794414 | 0.855756614 |
| Metabolism Biosynthesis of Other Secondary Metabolites Caffeine metabolism                                       | 1.396012086 | GC | 0.42396306  | 0.856172602 |
| Unclassified Cellular Processes and Signaling Signal transduction mechanisms                                     | 3.651159977 | GC | 1.696512946 | 0.862111389 |
| Metabolism_Xenobiotics_Biodegradation_and_Metabolism_Chlorocyclohexane_and_chlorobenzene degradation             | 2.928444119 | AG | 1.612342407 | 0.867069025 |
| Environmental Information Processing_Signal_Transduction_VEGF_signaling_pathway                                  | 0           | SG | 0.702330249 | 0.869889972 |
| Environmental Information Processing_Signaling_Molecules_and_Interaction_Neuroactive ligand receptor interaction | 0           | AG | 0.671715635 | 0.870113993 |
| Metabolism_Metabolism_of_Terpenoids_and_Polyketides_Sesquiterpenoid_biosynthesis                                 | 0.334409437 | AG | 0.323292016 | 0.870399466 |
| Genetic Information Processing_FoldingSorting_and_Degradation_RNA_degradation                                    | 3.640830647 | GC | 1.627394259 | 0.872508247 |
| Human Diseases Infectious Diseases Leishmaniasis                                                                 | 0           | SG | 0.663091068 | 0.872919596 |
| Genetic Information Processing_FoldingSorting_and_Degradation_Ubiquitin_system                                   | 2.236724892 | IM | 0.859626382 | 0.875123069 |
| Genetic Information Processing_Replication_and_Repair_Non_homologous_end_joining                                 | 2.538573184 | AG | 1.276025444 | 0.880609563 |
| Unclassified Cellular Processes and Signaling Electron transfer carriers                                         | 2.558388879 | SG | 1.120045129 | 0.882367636 |
| Unclassified_Genetic_Information_Processing_Replicationrecombination_and_repair_proteins                         | 3.900819583 | GC | 2.097956813 | 0.886233721 |
| Metabolism_Biosynthesis_of_Other_Secondary_Metabolites_Novobiocin_biosynthesis                                   | 3.083341046 | GC | 1.150441511 | 0.89005902  |
| Metabolism Biosynthesis of Other Secondary Metabolites Betalain biosynthesis                                     | 1.359287203 | AG | 0.367000623 | 0.890819168 |
| Metabolism_Xenobiotics_Biodegradation_and_Metabolism_Dioxin_degradation                                          | 2.858602577 | GC | 1.165610762 | 0.891496669 |
| Metabolism_Xenobiotics_Biodegradation_and_Metabolism_Polycyclic_aromatic_hydrocarbon degradation                 | 3.174385786 | GC | 1.56351596  | 0.894705104 |
| Metabolism_Biosynthesis_of_Other_Secondary_Metabolites_Indole_alkaloid_biosynthesis                              | 1.267113093 | GC | 0.343055187 | 0.898759912 |
| Metabolism_Xenobiotics_Biodegradation_and_Metabolism_Naphthalene_degradation                                     | 3.389065131 | AG | 1.768162167 | 0.903101659 |
| Human Diseases Immune System Diseases Systemic lupus erythematosus                                               | 1.025237818 | IM | 0.52556018  | 0.903233728 |
| Environmental Information Processing_Signal_Transduction_MAPK_signaling_pathway yeast                            | 2.610190332 | IM | 0.985648143 | 0.906975173 |
| Organismal Systems_Excretory_System_Aldosterone_regulated_sodium_reabsorption                                    | 0           | SG | 1.528074951 | 0.908278903 |
| Metabolism_Biosynthesis_of_Other_Secondary_Metabolites_Tropanepiperidine_and_pyridine alkaloid biosynthesis      | 3.068741448 | GC | 1.263359792 | 0.918670073 |
| Genetic Information Processing_Folding_Sorting_and_Degradation_Proteasome                                        | 2.534634536 | GC | 0.865048418 | 0.920843421 |
| Cellular Processes_Cell_Growth_and_Death_Meiosis_yeast                                                           | 2.396024072 | AG | 1.132595711 | 0.923711823 |
| Metabolism_Xenobiotics_Biodegradation_and_Metabolism_Chloroalkane_and_chloroalkene degradation                   | 3.40825036  | AG | 1.77655914  | 0.927261064 |
| Human Diseases Neurodegenerative Diseases Prion diseases                                                         | 2.100332943 | IM | 0.556531768 | 0.932524741 |
| Unclassified Metabolism Nucleotide metabolism                                                                    | 2.6802529   | IM | 1.111026688 | 0.932727863 |
| Metabolism_Xenobiotics_Biodegradation_and_Metabolism_Fluorobenzoate_degradation                                  | 2.595547087 | AG | 1.41175282  | 0.937106077 |
| Human Diseases_Infectious_Diseases_Epithelial_cell_signaling_in_Helicobacter_pylori infection                    | 2.83520567  | GC | 1.436545542 | 0.942307352 |
| Metabolism Lipid Metabolism Linoleic acid metabolism                                                             | 2.824432177 | GC | 1.361916738 | 0.94720983  |
| Organismal Systems_Excretory_System_Proximal_tubule_bicarbonate_reclamation                                      | 2.408322899 | AG | 1.047607761 | 0.96361346  |
| Metabolism_Amino_Acid_Metabolism_Phenylalanine_tyrosine_and_tryptophan_biosynthesis                              | 3.859668932 | IM | 1.784365276 | 0.968397845 |

|                                                                             |             |    |             |             |
|-----------------------------------------------------------------------------|-------------|----|-------------|-------------|
| Metabolism Amino Acid Metabolism Tyrosine metabolism                        | 3.617061647 | AG | 1.648837864 | 0.970428018 |
| Metabolism Carbohydrate Metabolism Pyruvate metabolism                      | 4.032396718 | AG | 1.57936964  | 0.972402848 |
| Organismal Systems Endocrine System Renin angiotensin system                | 1.66507688  | IM | 0.494214315 | 0.982372358 |
| Metabolism Carbohydrate Metabolism Ascorbate and aldarate metabolism        | 3.129419051 | AG | 1.394210315 | 0.983158847 |
| Metabolism Xenobiotics Biodegradation and Metabolism Bisphenol degradation  | 3.067114296 | GC | 1.617037275 | 0.984276448 |
| Environmental Information Processing Membrane Transport ABC transporters    | 4.526419622 | AG | 2.441622472 | 0.98488297  |
| Human Diseases Cancers Prostate cancer                                      | 2.443225425 | GC | 0.86882128  | 0.988278934 |
| Organismal_Systems_Endocrine_System_Progesterone_mediated_oocyte_maturation | 2.442934098 | GC | 0.869133686 | 0.988951084 |
| Organismal Systems Immune System Antigen processing and presentation        | 2.442934098 | GC | 0.869133686 | 0.988951084 |

SG: Superficial gastritis  
AG: Atrophic gastritis  
IM: Intestinal metaplasia  
GC: Gastric cancer  
LDA: Linear discriminant analysis
