# Supplementary material for: Mucosal microbiome dysbiosis in gastric carcinogenesis
Source: PubMed Central journal article supplement — Gut. 2017 Aug 1;67(6):1024–32. doi: 10.1136/gutjnl-2017-314281 (PMC5969346; doi:10.1136/gutjnl-2017-314281), 2017-08-01
Supplement: gutjnl-2017-314281supp017.pdf [file gutjnl-2017-314281supp017.pdf]

**Supplementary table 17: Nearest sequence taxon index (NSTI) scores (Xi'an cohort)**

| Sample_ID     | Diagnosis | Metric        | NSTI scores |
|---------------|-----------|---------------|-------------|
| 104HK_2FT.v4  | IM        | Weighted NSTI | 0.086554642 |
| 226973_2DT.v4 | AG        | Weighted NSTI | 0.060548585 |
| 29HK_34T.v4   | SG        | Weighted NSTI | 0.094059179 |
| 973_1_Di.v4   | AG        | Weighted NSTI | 0.082733303 |
| 973_1_T.v4    | AG        | Weighted NSTI | 0.111154508 |
| 973_12_Di.v4  | SG        | Weighted NSTI | 0.131722863 |
| 973_12_Dou.v4 | SG        | Weighted NSTI | 0.071613148 |
| 973_12_T.v4   | SG        | Weighted NSTI | 0.059767511 |
| 973_13_Di.v4  | SG        | Weighted NSTI | 0.0990924   |
| 973_13_Dou.v4 | SG        | Weighted NSTI | 0.095971913 |
| 973_13_T.v4   | SG        | Weighted NSTI | 0.103507204 |
| 973_14_Di.v4  | SG        | Weighted NSTI | 0.085388171 |
| 973_14_Dou.v4 | SG        | Weighted NSTI | 0.079217185 |
| 973_14_T.v4   | SG        | Weighted NSTI | 0.095495423 |
| 973_15_Di.v4  | AG        | Weighted NSTI | 0.079928578 |
| 973_15_Dou.v4 | AG        | Weighted NSTI | 0.089760785 |
| 973_15_T.v4   | AG        | Weighted NSTI | 0.090540534 |
| 973_16_Di.v4  | AG        | Weighted NSTI | 0.102600582 |
| 973_16_Dou.v4 | AG        | Weighted NSTI | 0.092918569 |
| 973_16_T.v4   | AG        | Weighted NSTI | 0.091501933 |
| 973_17_Di.v4  | AG        | Weighted NSTI | 0.107865613 |
| 973_17_Dou.v4 | AG        | Weighted NSTI | 0.090966681 |
| 973_17_T.v4   | AG        | Weighted NSTI | 0.080083417 |
| 973_18_Di.v4  | SG        | Weighted NSTI | 0.059035563 |
| 973_18_Dou.v4 | SG        | Weighted NSTI | 0.074966578 |
| 973_18_T.v4   | SG        | Weighted NSTI | 0.066053697 |
| 973_19_Di.v4  | AG        | Weighted NSTI | 0.101446922 |
| 973_19_Dou.v4 | AG        | Weighted NSTI | 0.093074968 |
| 973_19_T.v4   | AG        | Weighted NSTI | 0.073583881 |
| 973_2_DOU.v4  | AG        | Weighted NSTI | 0.0879571   |
| 973_2_T.v4    | AG        | Weighted NSTI | 0.071167573 |
| 973_20_Di.v4  | AG        | Weighted NSTI | 0.040549352 |
| 973_20_Dou.v4 | AG        | Weighted NSTI | 0.058119845 |
| 973_20_T.v4   | AG        | Weighted NSTI | 0.048917438 |
| 973_21_Di.v4  | SG        | Weighted NSTI | 0.068488052 |
| 973_21_Dou.v4 | SG        | Weighted NSTI | 0.079106755 |
| 973_21_T.v4   | SG        | Weighted NSTI | 0.065759248 |
| 973_22_Di.v4  | SG        | Weighted NSTI | 0.074082651 |
| 973_22_T.v4   | SG        | Weighted NSTI | 0.074071608 |
| 973_23_Di.v4  | SG        | Weighted NSTI | 0.043911779 |
| 973_23_Dou.v4 | SG        | Weighted NSTI | 0.093930017 |
| 973_23T224.v4 | SG        | Weighted NSTI | 0.092554054 |
| 973_4_Di.v4   | SG        | Weighted NSTI | 0.098965158 |

|               |    |               |             |
|---------------|----|---------------|-------------|
| 973_4_Dou.v4  | SG | Weighted NSTI | 0.092186591 |
| 973_4_T.v4    | SG | Weighted NSTI | 0.10117369  |
| 973_5_DI.v4   | AG | Weighted NSTI | 0.091452653 |
| 973_5_Dou.v4  | AG | Weighted NSTI | 0.076479161 |
| 973_5_T.v4    | AG | Weighted NSTI | 0.07202296  |
| 973_6_Di.v4   | AG | Weighted NSTI | 0.088788068 |
| 973_6_Dou.v4  | AG | Weighted NSTI | 0.067316916 |
| 973_6_T.v4    | AG | Weighted NSTI | 0.084503307 |
| 973_7_Di.v4   | AG | Weighted NSTI | 0.084950491 |
| 973_7_Dou.v4  | AG | Weighted NSTI | 0.087158699 |
| 973_7_T.v4    | AG | Weighted NSTI | 0.104996871 |
| 973_9_DI.v4   | AG | Weighted NSTI | 0.092387363 |
| 973_9_DOU.v4  | AG | Weighted NSTI | 0.104118724 |
| 973_9_T.v4    | AG | Weighted NSTI | 0.066961955 |
| 97HK_9T.v4    | AG | Weighted NSTI | 0.1108027   |
| HK_1_Dou.v4   | AG | Weighted NSTI | 0.113945857 |
| HK_1_T.v4     | AG | Weighted NSTI | 0.087042267 |
| HK_10_Di.v4   | SG | Weighted NSTI | 0.030697611 |
| HK_10_Dou.v4  | SG | Weighted NSTI | 0.07507932  |
| HK_10_T.v4    | SG | Weighted NSTI | 0.0637238   |
| HK_11_DI.v4   | IM | Weighted NSTI | 0.099274074 |
| HK_11_T.v4    | IM | Weighted NSTI | 0.078304156 |
| HK_13_T.v4    | SG | Weighted NSTI | 0.106671667 |
| HK_14_Di.v4   | AG | Weighted NSTI | 0.097392722 |
| HK_15_Dou.v4  | AG | Weighted NSTI | 0.111993563 |
| HK_15_T.v4    | AG | Weighted NSTI | 0.101917437 |
| HK_16_Di.v4   | IM | Weighted NSTI | 0.123085712 |
| HK_16_DOU.v4  | IM | Weighted NSTI | 0.099051875 |
| HK_16_T.v4    | IM | Weighted NSTI | 0.112548689 |
| HK_17_Di.v4   | AG | Weighted NSTI | 0.106424112 |
| HK_17_Dou.v4  | AG | Weighted NSTI | 0.110184431 |
| HK_17_T.v4    | AG | Weighted NSTI | 0.114689466 |
| HK_19_Di.v4   | SG | Weighted NSTI | 0.102083248 |
| HK_19_Dou.v4  | SG | Weighted NSTI | 0.11342224  |
| HK_19_T.v4    | SG | Weighted NSTI | 0.109586013 |
| HK_2_Di.v4    | SG | Weighted NSTI | 0.087347155 |
| HK_2_T.v4     | SG | Weighted NSTI | 0.099290259 |
| HK_20_Di.v4   | AG | Weighted NSTI | 0.081635188 |
| HK_20_Dou.v4  | AG | Weighted NSTI | 0.082333975 |
| HK_20_T.v4    | AG | Weighted NSTI | 0.1222729   |
| HK_21_Dou.v4  | SG | Weighted NSTI | 0.084932844 |
| HK_21_T.v4    | SG | Weighted NSTI | 0.093136376 |
| HK_21DT202.v4 | SG | Weighted NSTI | 0.079467113 |
| HK_22_Di.v4   | SG | Weighted NSTI | 0.104896516 |
| HK_22_Dou.v4  | SG | Weighted NSTI | 0.089689402 |

|              |    |               |             |
|--------------|----|---------------|-------------|
| HK_22_T.v4   | SG | Weighted NSTI | 0.104079604 |
| HK_23_Di.v4  | IM | Weighted NSTI | 0.079705473 |
| HK_23_Dou.v4 | IM | Weighted NSTI | 0.063516663 |
| HK_23_T.v4   | IM | Weighted NSTI | 0.081561841 |
| HK_24_Di.v4  | IM | Weighted NSTI | 0.073304305 |
| HK_24_Dou.v4 | IM | Weighted NSTI | 0.077838848 |
| HK_24_T.v4   | IM | Weighted NSTI | 0.068883861 |
| HK_26_Di.v4  | IM | Weighted NSTI | 0.086740725 |
| HK_26_Dou.v4 | IM | Weighted NSTI | 0.073667941 |
| HK_26T.v4    | IM | Weighted NSTI | 0.047460192 |
| HK_27_Di.v4  | IM | Weighted NSTI | 0.089975701 |
| HK_27_Dou.v4 | IM | Weighted NSTI | 0.093767033 |
| HK_28_Di.v4  | AG | Weighted NSTI | 0.086664675 |
| HK_28_T.v4   | AG | Weighted NSTI | 0.088536185 |
| HK_28Dou.v4  | AG | Weighted NSTI | 0.096177152 |
| HK_29_Di.v4  | SG | Weighted NSTI | 0.085384278 |
| HK_29_Dou.v4 | SG | Weighted NSTI | 0.050172846 |
| HK_29_T.v4   | SG | Weighted NSTI | 0.037493365 |
| HK_3_Di.v4   | IM | Weighted NSTI | 0.038367334 |
| HK_3_Dou.v4  | IM | Weighted NSTI | 0.062767241 |
| HK_3_T.v4    | IM | Weighted NSTI | 0.05815905  |
| HK_30_Di.v4  | IM | Weighted NSTI | 0.102680566 |
| HK_30_T.v4   | IM | Weighted NSTI | 0.094430926 |
| HK_31_Di.v4  | AG | Weighted NSTI | 0.034000387 |
| HK_31_Dou.v4 | AG | Weighted NSTI | 0.051760416 |
| HK_31_T.v4   | AG | Weighted NSTI | 0.04621701  |
| HK_32_Di.v4  | IM | Weighted NSTI | 0.069753513 |
| HK_32_Dou.v4 | IM | Weighted NSTI | 0.098301002 |
| HK_32_T.v4   | IM | Weighted NSTI | 0.108102213 |
| HK_33_Di.v4  | AG | Weighted NSTI | 0.098723339 |
| HK_33_Dou.v4 | AG | Weighted NSTI | 0.070786857 |
| HK_33_T.v4   | AG | Weighted NSTI | 0.076392574 |
| HK_34_Di.v4  | SG | Weighted NSTI | 0.061083136 |
| HK_34_Dou.v4 | SG | Weighted NSTI | 0.068369247 |
| HK_35_Di.v4  | IM | Weighted NSTI | 0.061629579 |
| HK_35_Dou.v4 | IM | Weighted NSTI | 0.074470844 |
| HK_36_Di.v4  | AG | Weighted NSTI | 0.089273255 |
| HK_36_Dou.v4 | AG | Weighted NSTI | 0.071927042 |
| HK_36_T.v4   | AG | Weighted NSTI | 0.021080062 |
| HK_37_Di.v4  | IM | Weighted NSTI | 0.066158105 |
| HK_37_Dou.v4 | IM | Weighted NSTI | 0.058184164 |
| HK_37_T.v4   | IM | Weighted NSTI | 0.074791147 |
| HK_38_Di.v4  | SG | Weighted NSTI | 0.067131409 |
| HK_38_Dou.v4 | SG | Weighted NSTI | 0.066716756 |
| HK_4_Di.v4   | AG | Weighted NSTI | 0.073427159 |

|               |    |               |             |
|---------------|----|---------------|-------------|
| HK_4_Dou.v4   | AG | Weighted NSTI | 0.066615178 |
| HK_4_T.v4     | AG | Weighted NSTI | 0.055251508 |
| HK_5_Di.v4    | IM | Weighted NSTI | 0.046559438 |
| HK_5_Dou.v4   | IM | Weighted NSTI | 0.091951148 |
| HK_5_T.v4     | IM | Weighted NSTI | 0.077803312 |
| HK_6_Di.v4    | IM | Weighted NSTI | 0.067966233 |
| HK_6_Dou.v4   | IM | Weighted NSTI | 0.063070792 |
| HK_6_T.v4     | IM | Weighted NSTI | 0.092584196 |
| HK_7_Di.v4    | SG | Weighted NSTI | 0.073342713 |
| HK_7_Dou.v4   | SG | Weighted NSTI | 0.068037276 |
| HK_7_T.v4     | SG | Weighted NSTI | 0.106566937 |
| HK_8_Di.v4    | IM | Weighted NSTI | 0.037905109 |
| HK_8_Dou.v4   | IM | Weighted NSTI | 0.033280033 |
| HK_8_T.v4     | IM | Weighted NSTI | 0.021616315 |
| HK_9_Di.v4    | AG | Weighted NSTI | 0.100908527 |
| HK_9_Dou.v4   | AG | Weighted NSTI | 0.075211943 |
| HK12T244.v4   | SG | Weighted NSTI | 0.052693157 |
| HK14Dou246.v4 | AG | Weighted NSTI | 0.105280523 |
| HK14T247.v4   | AG | Weighted NSTI | 0.077722775 |
| HK15DT248.v4  | AG | Weighted NSTI | 0.076407428 |
| HK25Dou200.v4 | IM | Weighted NSTI | 0.118108618 |
| HK25DT199.v4  | IM | Weighted NSTI | 0.107880391 |
| HK25T198.v4   | IM | Weighted NSTI | 0.120157985 |
| HK35T.v4      | IM | Weighted NSTI | 0.110600676 |
| YJ_Ca_10.v4   | GC | Weighted NSTI | 0.090188674 |
| YJ_CA_12.v4   | GC | Weighted NSTI | 0.077707081 |
| YJ_Ca_13.v4   | GC | Weighted NSTI | 0.060125684 |
| YJ_Ca_14.v4   | GC | Weighted NSTI | 0.055715377 |
| YJ_Ca_15.v4   | SG | Weighted NSTI | 0.075632011 |
| YJ_Ca_16.v4   | GC | Weighted NSTI | 0.062169293 |
| YJ_Ca_17.v4   | IM | Weighted NSTI | 0.072416755 |
| YJ_Ca_18.v4   | GC | Weighted NSTI | 0.033175534 |
| YJ_Ca_19.v4   | SG | Weighted NSTI | 0.091603953 |
| YJ_Ca_20.v4   | AG | Weighted NSTI | 0.100250096 |
| YJ_Ca_22.v4   | GC | Weighted NSTI | 0.084443207 |
| YJ_Ca_23.v4   | GC | Weighted NSTI | 0.088026832 |
| YJ_Ca_24.v4   | GC | Weighted NSTI | 0.088012187 |
| YJ_Ca_25.v4   | GC | Weighted NSTI | 0.100365843 |
| YJ_Ca_7.v4    | GC | Weighted NSTI | 0.050303398 |
| YJ_ca_8.v4    | GC | Weighted NSTI | 0.093400061 |
| YJ_Ca_9.v4    | GC | Weighted NSTI | 0.108391282 |
| YJ_Ca2.v4     | GC | Weighted NSTI | 0.055140421 |
| YJ_ca21.v4    | GC | Weighted NSTI | 0.089218144 |
| YJ_Ca3.v4     | GC | Weighted NSTI | 0.082390502 |
| YJ_Ca4.v4     | GC | Weighted NSTI | 0.076185217 |

|              |    |               |             |
|--------------|----|---------------|-------------|
| YJ_Ca5.v4    | GC | Weighted NSTI | 0.070675106 |
| YJ_Ca6.v4    | GC | Weighted NSTI | 0.055590825 |
| YJ_N_15.v4   | SG | Weighted NSTI | 0.091958316 |
| YJ_N_17.v4   | IM | Weighted NSTI | 0.07484037  |
| YJ_N_19.v4   | SG | Weighted NSTI | 0.077759271 |
| YJ_N_20.v4   | AG | Weighted NSTI | 0.099310437 |
| YJCall265.v4 | GC | Weighted NSTI | 0.094753788 |

SG: Superficial gastritis

AG: Atrophic gastritis

IM: Intestinal metaplasia

GC: Gastric cancer
