# Supplementary material for: Mucosal microbiome dysbiosis in gastric carcinogenesis
Source: PubMed Central journal article supplement — Gut. 2017 Aug 1;67(6):1024–32. doi: 10.1136/gutjnl-2017-314281 (PMC5969346; doi:10.1136/gutjnl-2017-314281), 2017-08-01
Supplement: gutjnl-2017-314281supp018.pdf [file gutjnl-2017-314281supp018.pdf]

**Supplementary table 18: Differential predicted KEGG pathways (level 1) between SG and GC in Inner Mongolia cohort**

| Predicted_function_level1            | LogMaxMean  | Class | LDA score   | p value     |
|--------------------------------------|-------------|-------|-------------|-------------|
| Human_Diseases                       | 4.034612314 | SG    | 2.751932008 | 0.000808095 |
| None                                 | 3.228250416 | SG    | 2.474040184 | 0.027460154 |
| Cellular_Processes                   | 4.616929466 | SG    | 3.630781178 | 0.000808095 |
| Genetic_Information_Processing       | 5.268552471 | GC    | 3.680194767 | 0.007634431 |
| Unclassified                         | 5.147473468 | SG    | 2.872101032 | 0.196608197 |
| Organismal_Systems                   | 3.832498053 | SG    | 2.420527812 | 0.32978478  |
| Metabolism                           | 5.680977114 | GC    | 3.023944569 | 0.335865972 |
| Environmental_Information_Processing | 5.161875422 | SG    | 3.23890648  | 0.788698891 |

**Supplementary table 19: Differential predicted KEGG pathways (level 1) among SG, AG and GC in Inner Mongolia cohort**

| Predicted_function_level1            | LogMaxMean  | Class | LDA score   | p value     |
|--------------------------------------|-------------|-------|-------------|-------------|
| Human_Diseases                       | 4.034612314 | SG    | 2.754418728 | 0.002828478 |
| None                                 | 3.228250416 | SG    | 2.47378945  | 0.058805837 |
| Cellular_Processes                   | 4.616929466 | SG    | 3.637682616 | 0.005651568 |
| Genetic_Information_Processing       | 5.268552471 | GC    | 3.730838673 | 0.022417516 |
| Unclassified                         | 5.147473468 | SG    | 2.936957482 | 0.053916224 |
| Organismal_Systems                   | 3.833489306 | AG    | 2.493743094 | 0.383807805 |
| Metabolism                           | 5.680977114 | GC    | 3.121040396 | 0.533818326 |
| Environmental_Information_Processing | 5.161875422 | SG    | 3.152056569 | 0.901428312 |

**Supplementary table 20: Differential predicted KEGG pathways (level 2) between SG and GC in Inner Mongolia cohort**

| Predicted_function_level2                   | LogMaxMean  | Class | LDA score   | p value     |
|---------------------------------------------|-------------|-------|-------------|-------------|
| Carbohydrate_Metabolism                     | 5.006487616 | GC    | 3.342287521 | 0.002056104 |
| Transcription                               | 4.382635756 | GC    | 2.777781523 | 0.009807292 |
| Genetic_Information_Processing              | 4.451600245 | GC    | 2.478087696 | 0.161240392 |
| Energy_Metabolism                           | 4.739622131 | SG    | 2.885998392 | 0.278283196 |
| Membrane_Transport                          | 5.092649593 | GC    | 3.205676782 | 0.479848086 |
| Metabolism                                  | 4.378138888 | GC    | 2.368559038 | 0.105192505 |
| Neurodegenerative_Diseases                  | 3.562320576 | SG    | 2.675764845 | 0.000144267 |
| Endocrine_System                            | 3.432873267 | SG    | 2.000977803 | 0.733034613 |
| Cardiovascular_Diseases                     | 1.868844255 | SG    | 0.930499236 | 0.18423727  |
| Nucleotide_Metabolism                       | 4.599711544 | GC    | 3.242270513 | 0.005687422 |
| Metabolism_of_Terpenoids_and_Polyketides    | 4.274209172 | SG    | 2.012128223 | 0.893402355 |
| Translation                                 | 4.733581309 | GC    | 3.303471433 | 0.008816305 |
| Biosynthesis_of_Other_Secondary_Metabolites | 3.860087132 | SG    | 2.106956843 | 0.788698891 |
| Signaling_Molecules_and_Interaction         | 3.340088105 | GC    | 1.946113155 | 0.079398735 |
| Amino_Acid_Metabolism                       | 5.006486316 | SG    | 3.325077865 | 0.002056104 |
| Transport_and_Catabolism                    | 3.420276345 | SG    | 1.854500961 | 0.798090825 |
| Metabolic_Diseases                          | 2.971375732 | GC    | 1.354886813 | 0.161240392 |
| Immune_System_Diseases                      | 2.70925312  | SG    | 0.997407494 | 0.172452258 |
| Folding                                     | 4.445232033 | GC    | 3.106129625 | 0.373855535 |
| Xenobiotics_Biodegradation_and_Metabolism   | 4.451141162 | SG    | 2.64363666  | 0.835938527 |
| Immune_System                               | 2.772959221 | SG    | 1.532785469 | 0.373855535 |
| Cell_Motility                               | 4.528753884 | SG    | 3.624685076 | 0.00045086  |
| Enzyme_Families                             | 4.29177113  | GC    | 2.595754102 | 0.000151527 |
| Glycan_Biosynthesis_and_Metabolism          | 4.328644007 | SG    | 2.670119746 | 0.566951697 |
| Digestive_System                            | 2.552765941 | GC    | 1.683589153 | 0.000619118 |
| Circulatory_System                          | 2.773940811 | SG    | 2.060721532 | 0.000283213 |

|                                      |             |    |             |             |
|--------------------------------------|-------------|----|-------------|-------------|
| Cancers                              | 3.138475639 | SG | 1.968615661 | 0.000212829 |
| Metabolism_of_Cofactors_and_Vitamins | 4.633581849 | SG | 2.511701969 | 0.116076349 |
| Lipid_Metabolism                     | 4.52152496  | SG | 2.573478693 | 0.534419348 |
| Poorly_Characterized                 | 4.702776192 | SG | 2.40338142  | 0.110528654 |
| Metabolism_of_Other_Amino_Acids      | 4.27049416  | SG | 2.454948492 | 0.004892834 |
| Replication_and_Repair               | 4.917870165 | GC | 3.256866255 | 0.03507782  |
| Cellular_Processes_and_Signaling     | 4.590148673 | SG | 3.027249074 | 0.003597433 |
| Nervous_System                       | 2.951434282 | GC | 1.383419874 | 0.835938527 |
| Cell_Communication                   | 0           | GC | 1.547417414 | 0.35355848  |
| Infectious_Diseases                  | 3.648751145 | GC | 1.75980335  | 0.237349047 |
| Cell_Growth_and_Death                | 3.723987228 | GC | 2.111683849 | 0.014343231 |
| Sensory_System                       | 0           | GC | 2.037947582 | 0.316266543 |
| Environmental_Adaptation             | 3.184636454 | SG | 1.856396122 | 0.001475492 |
| Signal_Transduction                  | 4.327076416 | SG | 3.054117673 | 0.000565881 |
| Excretory_System                     | 2.424446308 | GC | 1.294654314 | 0.472308058 |

**Supplementary table 21: Differential predicted KEGG pathways (level 2) among SG, AG and GC in Inner Mongolia cohort**

| Predicted_function_level2                   | LogMaxMean  | Class | LDA score   | p value     |
|---------------------------------------------|-------------|-------|-------------|-------------|
| Carbohydrate_Metabolism                     | 5.006487616 | GC    | 3.33353087  | 0.009502424 |
| Transcription                               | 4.382635756 | GC    | 2.846920595 | 0.014304444 |
| Genetic_Information_Processing              | 4.451600245 | GC    | 2.641205205 | 0.350351092 |
| Energy_Metabolism                           | 4.742810999 | AG    | 2.880035101 | 0.231008434 |
| Membrane_Transport                          | 5.092649593 | GC    | 3.188231398 | 0.783292637 |
| Metabolism                                  | 4.378138888 | GC    | 2.405637838 | 0.254975631 |
| Neurodegenerative_Diseases                  | 3.562320576 | SG    | 2.666999171 | 0.000447982 |
| Endocrine_System                            | 3.4457923   | AG    | 2.055489925 | 0.706918368 |
| Cardiovascular_Diseases                     | 1.90917605  | AG    | 1.02352616  | 0.401422603 |
| Nucleotide_Metabolism                       | 4.599711544 | GC    | 3.251699081 | 0.011666999 |
| Metabolism_of_Terpenoids_and_Polyketides    | 4.276185508 | AG    | 2.144904164 | 0.925731689 |
| Translation                                 | 4.733581309 | GC    | 3.3477182   | 0.018747437 |
| Biosynthesis_of_Other_Secondary_Metabolites | 3.860087132 | SG    | 2.193594516 | 0.971110704 |
| Signaling_Molecules_and_Interaction         | 3.340088105 | GC    | 2.049849854 | 0.0906531   |
| Amino_Acid_Metabolism                       | 5.006486316 | SG    | 3.351068437 | 0.003673348 |
| Transport_and_Catabolism                    | 3.434684943 | AG    | 2.023149199 | 0.768735274 |
| Metabolic_Diseases                          | 2.971375732 | GC    | 1.245791018 | 0.386478873 |
| Immune_System_Diseases                      | 2.70925312  | SG    | 1.117013652 | 0.411177072 |
| Folding                                     | 4.445232033 | GC    | 3.076990601 | 0.655179885 |
| Xenobiotics_Biodegradation_and_Metabolism   | 4.451141162 | SG    | 2.798959724 | 0.411273117 |
| Immune_System                               | 2.778011476 | AG    | 1.47372256  | 0.382471898 |
| Cell_Motility                               | 4.528753884 | SG    | 3.607381036 | 0.002850415 |
| Enzyme_Families                             | 4.29177113  | GC    | 2.61462747  | 0.000832517 |
| Glycan_Biosynthesis_and_Metabolism          | 4.339194826 | AG    | 2.746323444 | 0.244896111 |
| Digestive_System                            | 2.552765941 | GC    | 1.672035623 | 0.001278294 |
| Circulatory_System                          | 2.773940811 | SG    | 2.048046138 | 0.000782998 |
| Cancers                                     | 3.138475639 | SG    | 1.949881813 | 0.001500195 |
| Metabolism_of_Cofactors_and_Vitamins        | 4.633581849 | SG    | 2.510413261 | 0.333971008 |
| Lipid_Metabolism                            | 4.52152496  | SG    | 2.676911868 | 0.251755295 |
| Poorly_Characterized                        | 4.702776192 | SG    | 2.617709736 | 0.052036867 |
| Metabolism_of_Other_Amino_Acids             | 4.27049416  | SG    | 2.516753324 | 0.002405979 |
| Replication_and_Repair                      | 4.917870165 | GC    | 3.32091774  | 0.082621477 |

|                                  |             |    |             |             |
|----------------------------------|-------------|----|-------------|-------------|
| Cellular_Processes_and_Signaling | 4.590148673 | SG | 2.989281777 | 0.003120761 |
| Nervous_System                   | 2.951434282 | GC | 1.423580208 | 0.388599989 |
| Cell_Communication               | 0.045347806 | AG | 1.641962382 | 0.608086911 |
| Infectious_Diseases              | 3.648751145 | GC | 1.875659224 | 0.29324321  |
| Cell_Growth_and_Death            | 3.723987228 | GC | 2.156862318 | 0.010140886 |
| Sensory_System                   | 0           | AG | 2.104129319 | 0.585667313 |
| Environmental_Adaptation         | 3.184636454 | SG | 1.79897194  | 0.007037681 |
| Signal_Transduction              | 4.327076416 | SG | 3.063771419 | 0.00031389  |
| Excretory_System                 | 2.424446308 | GC | 1.347141791 | 0.516539301 |

**Supplementary table 22: Differential predicted KEGG pathways (level 3) between SG and GC in Inner Mongolia cohort**

| Predicted_function_level3                        | LogMaxMean  | Class | LDA score   | p value     |
|--------------------------------------------------|-------------|-------|-------------|-------------|
| Cytokine_receptors                               | 0           | GC    | 1.690823817 | 0.002172288 |
| Cysteine_and_methionine_metabolism               | 3.947926123 | GC    | 2.36771006  | 0.004041362 |
| Cytoskeleton_proteins                            | 3.3798356   | GC    | 2.031378197 | 0.008206346 |
| Toxoplasmosis                                    | 1.699352737 | SG    | 0.615987104 | 0.464833758 |
| Prion_diseases                                   | 2.095171814 | SG    | 1.228586559 | 0.002728892 |
| ECM_receptor_interaction                         | 0           | GC    | 1.879477727 | 0.273216461 |
| Ribosome                                         | 4.348265276 | GC    | 3.030079117 | 0.009466452 |
| Flavone_and_flavonol_biosynthesis                | 1.636020314 | GC    | 0.619944285 | 0.816961322 |
| Ubiquitin_system                                 | 2.348642133 | GC    | 1.046715156 | 0.893402355 |
| X_Alzheimer_s_disease_                           | 3.124013459 | SG    | 2.174232878 | 0.000565881 |
| Lipopolysaccharide_biosynthesis_proteins         | 3.721191006 | SG    | 2.802332849 | 0.003888145 |
| Transcription_related_proteins                   | 2.262898985 | GC    | 1.412895706 | 0.760711888 |
| Inorganic_ion_transport_and_metabolism           | 3.457959328 | SG    | 2.171775758 | 0.022010504 |
| Cardiac_muscle_contraction                       | 2.774238712 | SG    | 2.069363513 | 0.000270138 |
| Protein_kinases                                  | 3.561720009 | SG    | 1.58963547  | 0.526435998 |
| Valine_leucine_and_isoleucine_degradation        | 3.896000557 | SG    | 2.929390854 | 0.001414661 |
| Benzoate_degradation                             | 3.641609662 | SG    | 2.072115298 | 0.393809583 |
| Shigellosis                                      | 0           | SG    | 0.373312173 | 0.335673418 |
| Fatty_acid_metabolism                            | 3.756231502 | SG    | 2.58109169  | 0.051284087 |
| Lipid_biosynthesis_proteins                      | 3.836516627 | SG    | 1.998640223 | 0.21856001  |
| Ribosome_Biogenesis                              | 4.132881029 | GC    | 2.500963025 | 0.044430748 |
| Cell_division                                    | 2.815310722 | SG    | 1.545483492 | 0.348243411 |
| Biosynthesis_of_12_14_and_16_membered_macrolides | 1.092458457 | SG    | 0.545709147 | 0.002518605 |
| ErbB_signaling_pathway                           | 0           |       |             | -           |
| Amino_acid_related_enzymes                       | 4.146823709 | GC    | 2.402496224 | 0.019979529 |
| G_protein_coupled_receptors                      | 0           | GC    | 0.324660094 | 0.479848086 |
| Chronic_myeloid_leukemia                         | 0.111479813 | SG    | 0.190174549 | 0.011282557 |
| Vibrio_cholerae_pathogenic_cycle                 | 3.039028264 | SG    | 1.981981632 | 0.000357964 |
| Glycerophospholipid_metabolism                   | 3.746676713 | SG    | 1.818997547 | 0.134037993 |
| Cytokine_cytokine_receptor_interaction           | 0           | GC    | 1.726378546 | 0.002172288 |
| Non_homologous_end_joining                       | 2.391877489 | SG    | 1.277086885 | 0.262402981 |
| Spliceosome                                      | 0           |       |             | -           |
| Glycosyltransferases                             | 3.56630004  | GC    | 2.339575146 | 0.000341677 |
| Amino_acid_metabolism                            | 3.289385858 | GC    | 1.989472208 | 0.011680866 |
| Cell_motility_and_secretion                      | 3.384159316 | SG    | 2.201988875 | 0.113275747 |
| Mismatch_repair                                  | 3.86994726  | GC    | 2.245615246 | 0.051284087 |
| Pancreatic_secretion                             | 0           | SG    | 0.339652185 | 0.472308058 |
| Renin_angiotensin_system                         | 1.6274928   | SG    | 0.79346082  | 0.026616566 |

|                                                          |             |    |             |             |
|----------------------------------------------------------|-------------|----|-------------|-------------|
| Various_types_of_N_glycan_biosynthesis                   | 0.26692447  | GC | 0.350138724 | 0.566951697 |
| Restriction_enzyme                                       | 3.358976545 | GC | 2.140769431 | 0.10006288  |
| Ethylbenzene_degradation                                 | 2.876645541 | GC | 1.92283399  | 0.003326627 |
| Bacterial_toxins                                         | 3.095271072 | GC | 1.898029316 | 0.073336475 |
| Tetracycline_biosynthesis                                | 3.23595315  | GC | 1.853717272 | 0.317837729 |
| Clavulanic_acid_biosynthesis                             | 0           | SG | 0.746879739 | 0.760711888 |
| Secretion_system                                         | 4.285217546 | SG | 3.111035214 | 0.000516932 |
| Glycan_bindng_proteins                                   | 0           | SG | 1.446207104 | 0.836449558 |
| Methane_metabolism                                       | 4.004195725 | GC | 1.86328028  | 0.059001021 |
| Metabolism_of_cofactors_and_vitamins                     | 3.305071873 | SG | 1.927180214 | 0.018114094 |
| Endocytosis                                              | 0.599436038 | GC | 0.267728229 | 0.054262988 |
| Fat_digestion_and_absorption                             | 0           |    |             | -           |
| Glycosphingolipid_biosynthesis___globo_series            | 2.684207752 | GC | 1.793835256 | 0.005903447 |
| Homologous_recombination                                 | 3.931225293 | GC | 2.394028048 | 0.021314405 |
| Protein_export                                           | 3.764952979 | GC | 1.994185033 | 0.18423727  |
| Membrane_and_intracellular_structural_molecules          | 3.857468102 | SG | 2.812103322 | 0.000112626 |
| Alanine_aspartate_and_glutamate_metabolism               | 3.978769862 | GC | 1.789159136 | 0.855011718 |
| Lipoic_acid_metabolism                                   | 2.766460939 | GC | 1.313419164 | 0.23254813  |
| Toluene_degradation                                      | 3.28472551  | SG | 2.220319979 | 3.63324E-05 |
| Folate_biosynthesis                                      | 3.678190401 | GC | 1.901037067 | 0.48745329  |
| Cell_cycle                                               | 0           | GC | 1.936657308 | 0.432070076 |
| Primary_bile_acid_biosynthesis                           | 2.381143261 | GC | 1.254317505 | 0.526435998 |
| Lysosome                                                 | 2.747151123 | GC | 1.746060885 | 0.110528654 |
| Secondary_bile_acid_biosynthesis                         | 2.304230484 | GC | 1.286153722 | 0.617458472 |
| Chagas_disease__American_trypanosomiasis_                | 2.220502907 | SG | 1.334007445 | 0.005687422 |
| Penicillin_and_cephalosporin_biosynthesis                | 2.656096187 | SG | 1.659295914 | 0.007634431 |
| Pantothenate_and_CoA_biosynthesis                        | 3.755350311 | SG | 1.488087502 | 0.760711888 |
| Phagosome                                                | 0           | GC | 0.221521876 | 0.328214495 |
| Lipopolysaccharide_biosynthesis                          | 3.636934338 | SG | 2.815969279 | 0.000565881 |
| Type_I_diabetes_mellitus                                 | 2.721142    | GC | 0.74382636  | 0.742223888 |
| Function_unknown                                         | 4.220737088 | SG | 2.600564291 | 0.02421876  |
| Cytochrome_P450                                          | 0.407729209 | SG | 0.142511909 | 0.387087704 |
| Energy_metabolism                                        | 3.908051963 | SG | 2.637652971 | 0.065847798 |
| Signal_transduction_mechanisms                           | 3.672829457 | GC | 2.173691753 | 0.196608197 |
| Nicotinate_and_nicotinamide_metabolism                   | 3.600657413 | SG | 1.354910363 | 0.130903502 |
| Limonene_and_pinene_degradation                          | 3.468186768 | SG | 2.196927759 | 0.137230221 |
| Translation_proteins                                     | 3.921720962 | GC | 1.821425106 | 0.428465743 |
| Carbon_fixation_pathways_in_prokaryotes                  | 4.03778103  | SG | 2.623487811 | 0.00684342  |
| Biosynthesis_and_biodegradation_of_secondary_metabolites | 2.978289072 | SG | 2.005693895 | 0.000411285 |
| Other_transporters                                       | 3.324733487 | SG | 1.406950643 | 0.696670401 |
| Synthesis_and_degradation_of_ketone_bodies               | 3.203826987 | SG | 2.199176139 | 1.61512E-05 |
| Proximal_tubule_bicarbonate_reclamation                  | 2.419560604 | GC | 1.310025674 | 0.472308058 |
| Starch_and_sucrose_metabolism                            | 3.822574334 | GC | 2.839320913 | 7.5233E-05  |
| Fc_epsilon_R1_signaling_pathway                          | 0           |    |             | -           |
| Aldosterone_regulated_sodium_reabsorption                | 0           | SG | 0.722429554 | 0.407463622 |
| Butanoate_metabolism                                     | 4.012188285 | SG | 2.699041293 | 0.002728892 |
| Lysine_degradation                                       | 3.612306151 | SG | 2.600904845 | 0.000565881 |
| Biosynthesis_of_ansamycins                               | 2.834930862 | GC | 1.161822954 | 0.11893108  |
| Glycerolipid_metabolism                                  | 3.597153972 | GC | 2.503641579 | 9.21542E-05 |
| Galactose_metabolism                                     | 3.731209927 | GC | 2.845845831 | 6.45185E-05 |

|                                                     |             |    |             |             |
|-----------------------------------------------------|-------------|----|-------------|-------------|
| Carotenoid_biosynthesis                             | 2.396679631 | GC | 1.358747423 | 0.051284087 |
| DNA_replication                                     | 3.805952054 | GC | 2.268884462 | 0.073336475 |
| Biosynthesis_of_type_II_polyketide_backbone         | 0.191254553 | SG | 0.262329713 | 0.113275747 |
| Phosphotransferase_system_PTS_                      | 3.695722149 | GC | 3.017912917 | 0.000619118 |
| Amino_sugar_and_nucleotide_sugar_metabolism         | 4.088930371 | GC | 2.958728665 | 0.00016709  |
| Glycosaminoglycan_biosynthesis__chondroitin_sulfate | 0           | GC | 2.059677152 | 0.900831209 |
| Cell_cycle__yeast                                   | 0           |    |             | -           |
| X_Huntington_s_disease_                             | 3.046281941 | SG | 2.168870755 | 0.00025763  |
| Electron_transfer_carriers                          | 2.579641766 | GC | 1.345442048 | 0.414395187 |
| Meiosis__yeast                                      | 2.264018425 | GC | 0.96096673  | 0.534419348 |
| Cholinergic_synapse                                 | 0           |    |             | -           |
| Ether_lipid_metabolism                              | 1.816348994 | SG | 0.692891419 | 0.751450055 |
| Chlorocyclohexane_and_chlorobenzene_degradation     | 2.815176194 | SG | 1.711455862 | 0.14379021  |
| General_function_prediction_only                    | 4.536635062 | GC | 2.421902799 | 0.075313709 |
| Proteasome                                          | 2.506906936 | SG | 1.221606629 | 0.387087704 |
| Biotin_metabolism                                   | 3.220431643 | SG | 2.159071696 | 0.019979529 |
| Replication_recombination_and_repair_proteins       | 3.941758654 | GC | 2.589510352 | 0.010521946 |
| Hedgehog_signaling_pathway                          | 0           |    |             | -           |
| Xylene_degradation                                  | 2.791988272 | GC | 1.802982323 | 0.021314405 |
| Tyrosine_metabolism                                 | 3.655333862 | GC | 2.276713855 | 0.116076349 |
| African_trypanosomiasis                             | 2.216998403 | SG | 1.2865882   | 0.010521946 |
| Sesquiterpenoid_biosynthesis                        | 0.093445298 | SG | 0.214970499 | 0.039519963 |
| Transcription_factors                               | 4.181611726 | GC | 2.684972115 | 0.102602193 |
| Phosphonate_and_phosphinate_metabolism              | 2.779917089 | GC | 1.32187946  | 0.011282557 |
| Tuberculosis                                        | 3.156264502 | GC | 1.798113796 | 8.32884E-05 |
| Plant_pathogen_interaction                          | 3.174877879 | SG | 1.82607481  | 0.00436435  |
| Nitrogen_metabolism                                 | 3.867520271 | SG | 2.022503554 | 0.192418704 |
| Germination                                         | 1.688770203 | GC | 0.773295819 | 0.180244442 |
| Isoquinoline_alkaloid_biosynthesis                  | 2.687157454 | SG | 1.265631725 | 0.91269759  |
| Streptomycin_biosynthesis                           | 3.405893852 | GC | 2.041094631 | 0.021314405 |
| RNA_transport                                       | 3.089056936 | GC | 1.93939161  | 0.043157139 |
| Pyrimidine_metabolism                               | 4.234841902 | GC | 2.928805514 | 0.003888145 |
| Citrate_cycle__TCA_cycle_                           | 3.8553165   | SG | 2.519537804 | 0.002230854 |
| D_Glutamine_and_D_glutamate_metabolism              | 3.159348297 | GC | 1.836619656 | 0.026616566 |
| Photosynthesis__antenna_proteins                    | 1.000592097 | GC | 0.598774387 | 0.002056104 |
| Sphingolipid_metabolism                             | 2.996471052 | GC | 2.115558229 | 0.002141846 |
| PPAR_signaling_pathway                              | 3.127101452 | SG | 1.665061767 | 0.669842251 |
| Long_term_depression                                | 0           |    |             | -           |
| Phenylalanine_tyrosine_and_tryptophan_biosynthesis  | 3.860022334 | SG | 2.271373062 | 0.826437252 |
| VEGF_signaling_pathway                              | 0           | GC | 0.509860175 | 0.223153929 |
| Glycan_biosynthesis_and_metabolism                  | 2.825993808 | SG | 1.972905356 | 0.000565881 |
| Phenylalanine_metabolism                            | 3.47297394  | SG | 2.404331635 | 0.003740222 |
| Other_glycan_degradation                            | 3.114645046 | GC | 2.227727551 | 0.005276633 |
| Vasopressin_regulated_water_reabsorption            | 0.624088968 | GC | 0.194250422 | 0.770008145 |
| Progesterone_mediated_oocyte_maturation             | 2.427815884 | SG | 1.443872292 | 0.048443333 |
| MAPK_signaling_pathway__yeast                       | 2.616456109 | SG | 1.444825712 | 0.097573932 |
| Retinol_metabolism                                  | 2.858823729 | GC | 1.411032729 | 0.951431509 |
| One_carbon_pool_by_folate                           | 3.735847512 | GC | 2.341675013 | 4.72689E-05 |
| Valine_leucine_and_isoleucine_biosynthesis          | 3.819160571 | GC | 2.029226968 | 0.360906957 |
| Chaperones_and_folding_catalysts                    | 3.988443231 | SG | 2.045424124 | 0.407463622 |

|                                                            |             |    |             |             |
|------------------------------------------------------------|-------------|----|-------------|-------------|
| DNA_replication_proteins                                   | 4.03723184  | GC | 2.314323723 | 0.134037993 |
| Photosynthesis                                             | 3.544031656 | GC | 2.189600146 | 0.009136217 |
| Glycosphingolipid_biosynthesis___lacto_and_neolacto_series | 0           | SG | 1.067426463 | 0.15535945  |
| GTP_binding_proteins                                       | 0           | GC | 1.820329231 | 0.432070076 |
| Linoleic_acid_metabolism                                   | 2.822008925 | GC | 1.821806818 | 0.040702318 |
| Bacterial_secretion_system                                 | 3.88799858  | SG | 2.623795625 | 0.001143736 |
| Leishmaniasis                                              | 0           | GC | 0.510309387 | 0.223153929 |
| Fatty_acid_biosynthesis                                    | 3.734362448 | GC | 2.196247355 | 0.038366891 |
| Drug_metabolism___other_enzymes                            | 3.449888964 | GC | 2.177625166 | 0.001604445 |
| Biosynthesis_of_type_II_polyketide_products                | 1.075706183 | GC | 0.718845028 | 0.289226324 |
| Oxidative_phosphorylation                                  | 4.102767036 | SG | 2.841330702 | 0.007098505 |
| Fatty_acid_elongation_in_mitochondria                      | 0           | SG | 0.402392632 | 0.164914823 |
| NOD_like_receptor_signaling_pathway                        | 2.453454456 | SG | 1.207067592 | 0.414395187 |
| Insulin_signaling_pathway                                  | 2.69885736  | GC | 1.4214227   | 0.069509362 |
| Ion_channels                                               | 2.615966528 | GC | 1.840755623 | 0.021314405 |
| Indole_alkaloid_biosynthesis                               | 1.046391476 | SG | 0.266022206 | 0.348243411 |
| Peptidoglycan_biosynthesis                                 | 3.882626183 | GC | 2.648942266 | 0.000619118 |
| Glutathione_metabolism                                     | 3.60125535  | SG | 2.153684045 | 0.001893995 |
| Apoptosis                                                  | 2.201634049 | GC | 1.528457228 | 0.001743702 |
| X_Parkinson_s_disease_                                     | 2.809583712 | SG | 2.079596757 | 0.000212829 |
| Salivary_secretion                                         | 0           | GC | 0.548688808 | 0.35453948  |
| Purine_metabolism                                          | 4.357279709 | GC | 3.008919686 | 0.009136217 |
| mRNA_surveillance_pathway                                  | 0.392427248 | SG | 0.167268934 | 0.380436275 |
| Adipocytokine_signaling_pathway                            | 2.781756076 | SG | 1.430859147 | 0.835938527 |
| Fc_gamma_R_mediated_phagocytosis                           | 0.599436038 | GC | 0.267398354 | 0.054262988 |
| Glycolysis___Gluconeogenesis                               | 4.057881375 | GC | 2.883459564 | 0.000374974 |
| Pancreatic_cancer                                          | 0           |    |             | -           |
| Antigen_processing_and_presentation                        | 2.427815884 | SG | 1.443872292 | 0.048443333 |
| Prenyltransferases                                         | 3.511993464 | GC | 2.059239624 | 0.011680866 |
| Histidine_metabolism                                       | 3.692961864 | SG | 2.004270174 | 0.845463801 |
| Drug_metabolism___cytochrome_P450                          | 3.131456534 | SG | 1.845518388 | 0.062346699 |
| Hypertrophic_cardiomyopathy_HCM_                           | 1.366828356 | SG | 0.646846279 | 0.011680866 |
| Vitamin_B6_metabolism                                      | 3.245978717 | SG | 1.719474679 | 0.237349047 |
| C5_Branched_dibasic_acid_metabolism                        | 3.415585709 | GC | 1.805972604 | 0.407463622 |
| Complement_and_coagulation_cascades                        | 0           |    |             | -           |
| Long_term_potentialiation                                  | 0           |    |             | -           |
| Caffeine_metabolism                                        | 1.166063139 | SG | 0.284740371 | 0.464833758 |
| Oocyte_meiosis                                             | 0           |    |             | -           |
| Peroxisome                                                 | 3.339631187 | SG | 2.031569592 | 0.140480769 |
| Systemic_lupus_erythematosus                               | 0.817335226 | SG | 0.19787307  | 0.733034613 |
| Ubiquinone_and_other_terpenoid_quinone_biosynthesis        | 3.522713268 | SG | 2.238918154 | 0.001672741 |
| Peptidases                                                 | 4.205231305 | GC | 2.642583907 | 7.91639E-05 |
| Tight_junction                                             | 0           | GC | 0.221521876 | 0.328214495 |
| Glycosylphosphatidylinositol_GPI__anchor_biosynthesis      | 0           | SG | 1.584647397 | 0.345551511 |
| Naphthalene_degradation                                    | 3.383124135 | GC | 2.072458695 | 0.030130689 |
| Vascular_smooth_muscle_contraction                         | 0           |    |             | -           |
| Sulfur_relay_system                                        | 3.567306232 | SG | 2.142494453 | 0.002141846 |
| Protein_processing_in_endoplasmic_reticulum                | 2.664660395 | SG | 1.22097395  | 0.591957783 |
| Measles                                                    | 0           |    |             | -           |
| Renal_cell_carcinoma                                       | 2.445565069 | SG | 0.951440311 | 0.450084421 |

|                                                               |             |    |             |             |
|---------------------------------------------------------------|-------------|----|-------------|-------------|
| D_Alanine_metabolism                                          | 3.127532866 | GC | 2.104469722 | 0.004200041 |
| Small_cell_lung_cancer                                        | 1.701490437 | SG | 0.611099325 | 0.464833758 |
| Rheumatoid_arthritis                                          | 0           |    |             | -           |
| Phototransduction__fly                                        | 0           | GC | 0.221521876 | 0.328214495 |
| Butirosin_and_neomycin_biosynthesis                           | 2.735999941 | GC | 1.541137323 | 0.001538725 |
| Influenza_A                                                   | 1.703304771 | SG | 0.619842938 | 0.442810364 |
| Nitrotoluene_degradation                                      | 2.923502713 | SG | 1.885626666 | 0.283719035 |
| Pores_ion_channels                                            | 3.683451794 | SG | 2.644999065 | 0.000676984 |
| Mineral_absorption                                            | 2.026194013 | GC | 0.772188676 | 0.188295207 |
| Colorectal_cancer                                             | 1.69919692  | SG | 0.615855004 | 0.464833758 |
| Protein_digestion_and_absorption                              | 1.84769731  | SG | 0.72523605  | 0.387087704 |
| Pathways_in_cancer                                            | 2.776963863 | SG | 1.544951987 | 0.013401631 |
| Terpenoid_backbone_biosynthesis                               | 3.747894117 | GC | 2.326378044 | 0.008816305 |
| Amyotrophic_lateral_sclerosis__ALS__                          | 2.644224986 | SG | 1.710161242 | 4.03823E-05 |
| Primary_immunodeficiency                                      | 2.704165855 | SG | 1.029664269 | 0.242219569 |
| RIG_I_like_receptor_signaling_pathway                         | 1.743290802 | GC | 0.994889159 | 0.015865064 |
| Neuroactive_ligand_receptor_interaction                       | 0           | SG | 0.488944679 | 0.040702318 |
| Bladder_cancer                                                | 2.1139078   | SG | 1.352998411 | 0.001299878 |
| Nucleotide_excision_repair                                    | 3.56398508  | GC | 2.112395488 | 0.03614637  |
| Olfactory_transduction                                        | 0           |    |             | -           |
| Others                                                        | 4.003865213 | GC | 2.873114901 | 5.52594E-05 |
| Geraniol_degradation                                          | 3.442765596 | SG | 2.515855999 | 0.010159025 |
| N_Glycan_biosynthesis                                         | 2.265352152 | GC | 1.015647462 | 0.705700166 |
| ABC_transporters                                              | 4.53348587  | SG | 2.634766648 | 0.380436275 |
| Bacterial_motility_proteins                                   | 4.232253076 | SG | 3.372710503 | 0.00029688  |
| Lysine_biosynthesis                                           | 3.826162922 | GC | 2.374947513 | 0.000540891 |
| Type_II_diabetes_mellitus                                     | 2.61670772  | GC | 1.276527866 | 0.11893108  |
| Vibrio_cholerae_infection                                     | 1.346168478 | SG | 0.604729227 | 0.015865064 |
| Pertussis                                                     | 2.369509666 | SG | 1.292664639 | 0.110528654 |
| Other_ion_coupled_transporters                                | 4.116931588 | GC | 2.113070057 | 0.922365269 |
| X111_Trichloro_22_bis_4_chlorophenyl_ethane__DDT__degradation | 1.285762914 | SG | 0.437560852 | 0.057384899 |
| Neurotrophin_signaling_pathway                                | 0           |    |             | -           |
| alpha_Linolenic_acid_metabolism                               | 2.617841161 | SG | 1.835431626 | 1.80282E-05 |
| Fluorobenzoate_degradation                                    | 2.368966233 | SG | 1.280151251 | 0.237349047 |
| Sulfur_metabolism                                             | 3.473819031 | GC | 1.656585143 | 0.116076349 |
| Riboflavin_metabolism                                         | 3.429264805 | SG | 1.783623309 | 0.028326707 |
| Base_excision_repair                                          | 3.667201862 | GC | 2.005780959 | 0.11893108  |
| Phototransduction                                             | 0           |    |             | -           |
| Viral_myocarditis                                             | 1.701211623 | SG | 0.615302379 | 0.457425711 |
| Focal_adhesion                                                | 0           | GC | 0.245778083 | 0.399641193 |
| Cyanoamino_acid_metabolism                                    | 3.328749887 | GC | 1.342581347 | 0.534419348 |
| CAM_ligands                                                   | 0           | GC | 1.500218923 | 0.273216461 |
| Flagellar_assembly                                            | 3.91803541  | SG | 3.120975326 | 0.000184148 |
| Tropanepiperidine_and_pyridine_alkaloid_biosynthesis          | 2.992671028 | SG | 1.37596952  | 0.566951697 |
| GnRH_signaling_pathway                                        | 0.599436038 | GC | 0.267728229 | 0.054262988 |
| Pyruvate_metabolism                                           | 4.05880538  | GC | 2.188277331 | 0.591957783 |
| Carbon_fixation_in_photosynthetic_organisms                   | 3.704783662 | GC | 2.27671014  | 3.63324E-05 |
| Arginine_and_proline_metabolism                               | 4.089008474 | SG | 2.791312816 | 0.000184148 |
| Cell_cycle__Caulobacter                                       | 3.692665691 | GC | 2.034494522 | 0.013865375 |
| Chloroalkane_and_chloroalkene_degradation                     | 3.40060282  | GC | 1.975173242 | 0.196608197 |

|                                                      |             |    |             |             |
|------------------------------------------------------|-------------|----|-------------|-------------|
| Hepatitis_C                                          | 0           |    |             | -           |
| Leukocyte_transendothelial_migration                 | 0           | GC | 0.221521876 | 0.328214495 |
| Zeatin_biosynthesis                                  | 2.634667663 | GC | 1.330274327 | 0.007915763 |
| Betalain_biosynthesis                                | 1.17138243  | SG | 0.35266155  | 0.342018875 |
| Metabolism_of_xenobiotics_by_cytochrome_P450         | 3.111865468 | SG | 1.833296947 | 0.052755966 |
| RNA_degradation                                      | 3.655580987 | SG | 1.657340364 | 0.893402355 |
| Calcium_signaling_pathway                            | 0           | GC | 0.454039292 | 0.77933757  |
| Adherens_junction                                    | 0           | GC | 0.221521876 | 0.328214495 |
| Glycosaminoglycan_degradation                        | 2.420822568 | GC | 1.419584729 | 0.161240392 |
| TGF_beta_signaling_pathway                           | 0           |    |             | -           |
| Dioxin_degradation                                   | 2.904953396 | GC | 1.678978129 | 0.21856001  |
| Regulation_of_actin_cytoskeleton                     | 0           | GC | 0.221521876 | 0.328214495 |
| Protein_folding_and_associated_processing            | 3.924534567 | SG | 2.594715225 | 0.004200041 |
| Bisphenol_degradation                                | 3.025038381 | GC | 1.715482335 | 0.116076349 |
| Sporulation                                          | 3.203381213 | GC | 2.40780098  | 0.000392738 |
| Steroid_biosynthesis                                 | 1.882198075 | SG | 0.886576699 | 0.107834449 |
| Hematopoietic_cell_lineage                           | 0.17611235  | GC | 0.194177901 | 0.961136561 |
| Melanogenesis                                        | 0.661677567 | SG | 0.204163491 | 0.373855535 |
| Steroid_hormone_biosynthesis                         | 2.104086935 | SG | 0.857788599 | 0.575230638 |
| Isoflavonoid_biosynthesis                            | 0.586277042 | SG | 0.212428562 | 0.311971919 |
| Arachidonic_acid_metabolism                          | 2.816101016 | SG | 1.752942954 | 0.000270138 |
| Inositol_phosphate_metabolism                        | 3.32888535  | SG | 2.267727788 | 0.004200041 |
| Carbohydrate_digestion_and_absorption                | 2.251783442 | GC | 1.695559663 | 0.000540891 |
| Porphyrin_and_chlorophyll_metabolism                 | 3.952692848 | SG | 2.397506893 | 0.11893108  |
| Translation_factors                                  | 3.683076406 | GC | 2.327114859 | 0.001538725 |
| Selenocompound_metabolism                            | 3.587826464 | GC | 2.08996203  | 0.002839943 |
| Arrhythmogenic_right_ventricular_cardiomyopathy_ARVC | 0           | GC | 0.221521876 | 0.328214495 |
| Notch_signaling_pathway                              | 0.111479813 | SG | 0.190174549 | 0.011282557 |
| Carbohydrate_metabolism                              | 3.068129326 | GC | 2.006347878 | 0.003888145 |
| mTOR_signaling_pathway                               | 0           |    |             | -           |
| Bacterial_invasion_of_epithelial_cells               | 1.656459133 | GC | 1.124453984 | 0.00135615  |
| Basal_transcription_factors                          | 1.457690595 | GC | 0.697822963 | 0.335865972 |
| Taurine_and_hypotaurine_metabolism                   | 3.2055418   | SG | 1.578175828 | 0.205186859 |
| p53_signaling_pathway                                | 1.713233019 | SG | 0.61194534  | 0.479848086 |
| Tryptophan_metabolism                                | 3.696617051 | SG | 2.688380698 | 0.000493966 |
| Flavonoid_biosynthesis                               | 1.991022514 | SG | 0.813112591 | 0.442810364 |
| Wnt_signaling_pathway                                | 0.111479813 | SG | 0.190174549 | 0.011282557 |
| Aminoacyl_tRNA_biosynthesis                          | 4.073513091 | GC | 2.715978361 | 0.011680866 |
| Other_types_of_O_glycan_biosynthesis                 | 0           | SG | 1.581888514 | 0.63678001  |
| Nucleotide_metabolism                                | 2.821403391 | GC | 1.813094802 | 0.242219569 |
| Two_component_system                                 | 4.296755411 | SG | 3.060691325 | 0.000921488 |
| Bile_secretion                                       | 0.868158957 | SG | 0.23526965  | 0.479848086 |
| Lipid_metabolism                                     | 3.047987344 | GC | 1.822202891 | 0.001005091 |
| Ribosome_biogenesis_in_eukaryotes                    | 2.787994555 | SG | 1.280423929 | 0.02421876  |
| Stilbenoid_diarylheptanoid_and_gingerol_biosynthesis | 2.100106959 | GC | 0.963984692 | 0.300455682 |
| Pentose_and_glucuronate_interconversions             | 3.575360125 | GC | 1.987743597 | 0.034036353 |
| beta_Alanine_metabolism                              | 3.63955766  | SG | 2.659313906 | 0.001005091 |
| D_Arginine_and_D_ornithine_metabolism                | 1.945591823 | GC | 1.169699639 | 0.000808095 |
| Propanoate_metabolism                                | 3.958747936 | SG | 2.680382337 | 0.000844369 |
| Circadian_rhythm__plant                              | 1.553412899 | SG | 0.658288362 | 0.407463622 |



|                                                            |             |    |             |             |
|------------------------------------------------------------|-------------|----|-------------|-------------|
| Glutamatergic_synapse                                      | 2.953240572 | GC | 1.344468456 | 0.903042814 |
| Gastric_acid_secretion                                     | 0           | GC | 0.548688808 | 0.35453948  |
| Fructose_and_mannose_metabolism                            | 3.912277962 | GC | 2.958633115 | 0.000234227 |
| Pathogenic_Escherichia_coli_infection                      | 0           | GC | 0.221521876 | 0.328214495 |
| Dilated_cardiomyopathy__DCM__                              | 0           | GC | 0.221521876 | 0.328214495 |
| Staphylococcus_aureus_infection                            | 2.904609462 | GC | 2.335010013 | 0.001604445 |
| Ascorbate_and_aldarate_metabolism                          | 3.084353435 | GC | 1.535801366 | 0.367345699 |
| Glycine_serine_and_threonine_metabolism                    | 3.963001186 | SG | 2.466898287 | 0.002230854 |
| Cytosolic_DNA_sensing_pathway                              | 0           |    |             | -           |
| MAPK_signaling_pathway                                     | 0           |    |             | -           |
| Transcription_machinery                                    | 3.862615522 | GC | 1.824405898 | 0.652185451 |
| Polycyclic_aromatic_hydrocarbon_degradation                | 3.190528571 | GC | 1.83766193  | 0.044430748 |
| Styrene_degradation                                        | 2.936577131 | SG | 2.086377814 | 0.000234227 |
| Glyoxylate_and_dicarboxylate_metabolism                    | 3.864890869 | SG | 2.885281654 | 0.000112626 |
| Biosynthesis_of_unsaturated_fatty_acids                    | 3.347941402 | SG | 2.284570224 | 0.003198307 |
| Polyketide_sugar_unit_biosynthesis                         | 3.124537971 | GC | 1.801373777 | 0.092744582 |
| Prostate_cancer                                            | 2.428013925 | SG | 1.443373278 | 0.048443333 |
| Phosphatidylinositol_signaling_system                      | 3.048645195 | GC | 1.575258713 | 0.116076349 |
| Thiamine_metabolism                                        | 3.660600364 | GC | 2.373807465 | 0.015865064 |
| Epithelial_cell_signaling_in_Helicobacter_pylori_infection | 2.864078297 | SG | 1.761432745 | 0.380436275 |
| Novobiocin_biosynthesis                                    | 3.045622449 | SG | 1.37140793  | 0.172452258 |
| Glioma                                                     | 0           |    |             | -           |
| Glycosphingolipid_biosynthesis__ganglio_series             | 2.265252038 | GC | 1.412772571 | 0.064077506 |
| Transporters                                               | 4.795186229 | GC | 3.345469593 | 0.021314405 |
| Photosynthesis_proteins                                    | 3.562056155 | GC | 2.151075804 | 0.007915763 |
| Phenylpropanoid_biosynthesis                               | 2.902622848 | SG | 1.40775928  | 0.495123096 |
| Endocrine_and_other_factor_regulated_calcium_reabsorption  | 0           | GC | 0.548688808 | 0.35453948  |
| Bacterial_chemotaxis                                       | 3.799934829 | SG | 2.88513076  | 0.008206346 |
| Biosynthesis_of_vancomycin_group_antibiotics               | 2.644838268 | GC | 1.428791598 | 0.073336475 |
| Pentose_phosphate_pathway                                  | 3.890585346 | GC | 2.468649395 | 0.002056104 |
| DNA_repair_and_recombination_proteins                      | 4.433769465 | GC | 2.926373884 | 0.007915763 |
| Biosynthesis_of_siderophore_group_nonribosomal_peptides    | 2.711231584 | SG | 1.383088767 | 0.054262988 |
| Amoebiasis                                                 | 2.149720418 | SG | 1.247994998 | 0.209576838 |
| Aminobenzoate_degradation                                  | 3.46439492  | GC | 1.867992234 | 0.687683413 |
| RNA_polymerase                                             | 3.236896702 | GC | 2.123509844 | 0.002518605 |
| Caprolactam_degradation                                    | 3.300199586 | SG | 2.348928029 | 0.004200041 |
| beta_Lactam_resistance                                     | 2.498655459 | SG | 1.664123939 | 0.000619118 |
| Cellular_antigens                                          | 2.787676373 | SG | 1.586032814 | 0.008206346 |
| Chromosome                                                 | 4.151424023 | GC | 2.285365285 | 0.088109024 |
| Atrazine_degradation                                       | 2.823893071 | SG | 1.915659364 | 0.00232324  |

**Supplementary table 23: Differential predicted KEGG pathways (level 3) among SG, AG and GC in Inner Mongolia cohort**

| Predicted_function_level3          | LogMaxMean  | Class | LDA score   | p value     |
|------------------------------------|-------------|-------|-------------|-------------|
| Cytokine_receptors                 | 0           | GC    | 1.775086744 | 0.00321421  |
| Cysteine_and_methionine_metabolism | 3.947926123 | GC    | 2.395509929 | 0.006365014 |
| Cytoskeleton_proteins              | 3.3798356   | GC    | 2.051901671 | 0.014748109 |
| Toxoplasmosis                      | 1.785166233 | AG    | 0.983445468 | 0.663800325 |
| Prion_diseases                     | 2.095171814 | SG    | 1.279629442 | 0.002579845 |
| ECM_receptor_interaction           | 0           | GC    | 2.11914417  | 0.448216518 |
| Ribosome                           | 4.348265276 | GC    | 3.085004557 | 0.016031322 |

|                                                  |             |    |             |             |
|--------------------------------------------------|-------------|----|-------------|-------------|
| Flavone_and_flavonol_biosynthesis                | 1.636020314 | GC | 0.619449107 | 0.71595628  |
| Ubiquitin_system                                 | 2.348642133 | GC | 1.179350215 | 0.302027083 |
| X_Alzheimer_s_disease_                           | 3.124013459 | SG | 2.140317926 | 0.001453219 |
| Lipopolysaccharide_biosynthesis_proteins         | 3.721191006 | SG | 2.759812861 | 0.019254913 |
| Transcription_related_proteins                   | 2.262898985 | GC | 1.51612994  | 0.030146589 |
| Inorganic_ion_transport_and_metabolism           | 3.457959328 | SG | 2.227483077 | 0.052243837 |
| Cardiac_muscle_contraction                       | 2.774238712 | SG | 2.041879466 | 0.00077964  |
| Protein_kinases                                  | 3.561720009 | SG | 1.592238842 | 0.654574535 |
| Valine_leucine_and_ileucine_degradation          | 3.896000557 | SG | 2.965541606 | 0.002237051 |
| Benzoate_degradation                             | 3.641609662 | SG | 2.190462    | 0.372757185 |
| Shigellosis                                      | 0           | AG | 0.765171996 | 0.582938689 |
| Fatty_acid_metabolism                            | 3.756231502 | SG | 2.641676516 | 0.107081496 |
| Lipid_biosynthesis_proteins                      | 3.836516627 | SG | 2.084037269 | 0.386716425 |
| Ribosome_Biogenesis                              | 4.132881029 | GC | 2.511187327 | 0.106951138 |
| Cell_division                                    | 2.817128547 | AG | 1.573899384 | 0.471239566 |
| Biosynthesis_of_12_14_and_16_membered_macrolides | 1.092458457 | SG | 0.604303744 | 0.002770415 |
| ErbB_signaling_pathway                           | 0           |    |             | -           |
| Amino_acid_related_enzymes                       | 4.146823709 | GC | 2.463113069 | 0.049900477 |
| G_protein_coupled_receptors                      | 0           | GC | 0.594229067 | 0.222989434 |
| Chronic_myeloid_leukemia                         | 0.111479813 | SG | 0.326505859 | 0.053309772 |
| Vibrio_cholerae_pathogenic_cycle                 | 3.039028264 | SG | 1.964066922 | 0.002231817 |
| Glycerophospholipid_metabolism                   | 3.746676713 | SG | 1.741009995 | 0.379887572 |
| Cytokine_cytokine_receptor_interaction           | 0           | GC | 1.777516453 | 0.00321421  |
| Non_homologous_end_joining                       | 2.391877489 | SG | 1.346694588 | 0.477454227 |
| Spliceosome                                      | 0           |    |             | -           |
| Glycosyltransferases                             | 3.56630004  | GC | 2.346744815 | 0.00041375  |
| Amino_acid_metabolism                            | 3.289385858 | GC | 1.957779209 | 0.038864384 |
| Cell_motility_and_secretion                      | 3.390146491 | AG | 2.193889912 | 0.144575775 |
| Mismatch_repair                                  | 3.86994726  | GC | 2.323242381 | 0.122313026 |
| Pancreatic_secretion                             | 0           | AG | 0.601435091 | 0.739377886 |
| Renin_angiotensin_system                         | 1.6274928   | SG | 0.851808378 | 0.076917535 |
| Various_types_of_N_glycan_biosynthesis           | 0.279069829 | AG | 0.514707956 | 0.284344441 |
| Restriction_enzyme                               | 3.358976545 | GC | 2.206339803 | 0.219053815 |
| Ethylbenzene_degradation                         | 2.876645541 | GC | 1.908166364 | 0.013234457 |
| Bacterial_toxins                                 | 3.098188996 | AG | 1.965074884 | 0.095246791 |
| Tetracycline_biosynthesis                        | 3.23595315  | GC | 1.929053769 | 0.563433318 |
| Clavulanic_acid_biosynthesis                     | 0           | AG | 0.895857324 | 0.940742186 |
| Secretion_system                                 | 4.285217546 | SG | 3.081861773 | 0.002640055 |
| Glycan_bindng_proteins                           | 0           | AG | 1.523252256 | 0.933522435 |
| Methane_metabolism                               | 4.004195725 | GC | 1.824289969 | 0.123647267 |
| Metabolism_of_cofactors_and_vitamins             | 3.305071873 | SG | 1.997160737 | 0.014921641 |
| Endocytosis                                      | 0.599436038 | GC | 0.252840718 | 0.181024137 |
| Fat_digestion_and_absorption                     | 0           |    |             | -           |
| Glycosphingolipid_biosynthesis___globo_series    | 2.684207752 | GC | 1.784124712 | 0.01959978  |
| Homologous_recombination                         | 3.931225293 | GC | 2.43501324  | 0.045145685 |
| Protein_export                                   | 3.766674663 | AG | 2.128430412 | 0.210577797 |
| Membrane_and_intracellular_structural_molecules  | 3.857468102 | SG | 2.820720082 | 0.000133013 |
| Alanine_aspartate_and_glutamate_metabolism       | 3.978769862 | GC | 1.859749921 | 0.223742266 |
| Lipoic_acid_metabolism                           | 2.766460939 | GC | 1.272617119 | 0.4581801   |
| Toluene_degradation                              | 3.28472551  | SG | 2.229658323 | 4.95145E-06 |

|                                                          |             |    |             |             |
|----------------------------------------------------------|-------------|----|-------------|-------------|
| Folate_biosynthesis                                      | 3.682236404 | AG | 1.951903131 | 0.492034627 |
| Cell_cycle                                               | 0           | GC | 2.093959487 | 0.297371656 |
| Primary_bile_acid_biosynthesis                           | 2.381143261 | GC | 1.464429648 | 0.029085505 |
| Lysosome                                                 | 2.747151123 | GC | 1.73757898  | 0.338562847 |
| Secondary_bile_acid_biosynthesis                         | 2.304230484 | GC | 1.51270551  | 0.019475609 |
| Chagas_disease__American_trypanosomiasis_                | 2.220502907 | SG | 1.383389338 | 0.011129894 |
| Penicillin_and_cephalosporin_biosynthesis                | 2.656096187 | SG | 1.717937718 | 0.017559239 |
| Pantothenate_and_CoA_biosynthesis                        | 3.761825975 | AG | 1.752132875 | 0.224232679 |
| Phagosome                                                | 0           | AG | 0.223152946 | 0.592453473 |
| Lipopolysaccharide_biosynthesis                          | 3.636934338 | SG | 2.782528349 | 0.003875597 |
| Type_I_diabetes_mellitus                                 | 2.723715648 | AG | 0.748608102 | 0.630315442 |
| Function_unknown                                         | 4.220737088 | SG | 2.665702787 | 0.021543603 |
| Cytochrome_P450                                          | 0.434662923 | AG | 0.382364829 | 0.506086646 |
| Energy_metabolism                                        | 3.908051963 | SG | 2.666624414 | 0.150839576 |
| Signal_transduction_mechanisms                           | 3.672829457 | GC | 2.300854523 | 0.065004341 |
| Nicotinate_and_nicotinamide_metabolism                   | 3.600657413 | SG | 1.278092839 | 0.310853329 |
| Limonene_and_pinene_degradation                          | 3.468186768 | SG | 2.264272739 | 0.217109786 |
| Translation_proteins                                     | 3.921720962 | GC | 1.858221386 | 0.66648157  |
| Carbon_fixation_pathways_in_prokaryotes                  | 4.03778103  | SG | 2.592410551 | 0.026356568 |
| Biosynthesis_and_biodegradation_of_secondary_metabolites | 2.978289072 | SG | 1.993011214 | 0.001083325 |
| Other_transporters                                       | 3.324733487 | SG | 1.347259483 | 0.90368412  |
| Synthesis_and_degradation_of_ketone_bodies               | 3.203826987 | SG | 2.209810831 | 4.73668E-05 |
| Proximal_tubule_bicarbonate_reclamation                  | 2.419560604 | GC | 1.334908561 | 0.489375922 |
| Starch_and_sucrose_metabolism                            | 3.822574334 | GC | 2.8327886   | 0.000498276 |
| Fc_epsilon_R1_signaling_pathway                          | 0           |    |             | -           |
| Aldosterone_regulated_sodium_reabsorption                | 0           | AG | 1.222875675 | 0.337262024 |
| Butanoate_metabolism                                     | 4.012188285 | SG | 2.746859423 | 0.005222019 |
| Lysine_degradation                                       | 3.612306151 | SG | 2.628770387 | 0.002648912 |
| Biosynthesis_of_ansamycins                               | 2.837944273 | AG | 1.185279183 | 0.286902684 |
| Glycerolipid_metabolism                                  | 3.597153972 | GC | 2.506180008 | 0.000104563 |
| Galactose_metabolism                                     | 3.731209927 | GC | 2.846729296 | 0.000321322 |
| Carotenoid_biosynthesis                                  | 2.396679631 | GC | 1.359374454 | 0.086823908 |
| DNA_replication                                          | 3.805952054 | GC | 2.328340267 | 0.141774666 |
| Biosynthesis_of_type_II_polyketide_backbone              | 0.191254553 | SG | 0.64179916  | 0.203459596 |
| Phosphotransferase_system_PTS_                           | 3.695722149 | GC | 3.021763994 | 0.002602072 |
| Amino_sugar_and_nucleotide_sugar_metabolism              | 4.088930371 | GC | 2.975857263 | 0.00022108  |
| Glycosaminoglycan_biosynthesis__chondroitin_sulfate      | 0           | GC | 1.949941131 | 0.742545535 |
| Cell_cycle__yeast                                        | 0           |    |             | -           |
| X_Huntington_s_disease_                                  | 3.046281941 | SG | 2.145053829 | 0.00091471  |
| Electron_transfer_carriers                               | 2.60899202  | AG | 1.391235528 | 0.21236673  |
| Meiosis__yeast                                           | 2.317020041 | AG | 1.19776677  | 0.553581386 |
| Cholinergic_synapse                                      | 0           |    |             | -           |
| Ether_lipid_metabolism                                   | 1.872463077 | AG | 0.872718031 | 0.378213051 |
| Chlorocyclohexane_and_chlorobenzene_degradation          | 2.815176194 | SG | 1.759047466 | 0.261995538 |
| General_function_prediction_only                         | 4.536635062 | GC | 2.436877023 | 0.127077252 |
| Proteasome                                               | 2.53112116  | AG | 1.418538345 | 0.077255013 |
| Biotin_metabolism                                        | 3.229029872 | AG | 2.155411082 | 0.051933642 |
| Replication_recombination_and_repair_proteins            | 3.941758654 | GC | 2.635750755 | 0.030355392 |
| Hedgehog_signaling_pathway                               | 0           |    |             | -           |
| Xylene_degradation                                       | 2.791988272 | GC | 1.837585118 | 0.04104418  |

|                                                           |             |    |             |             |
|-----------------------------------------------------------|-------------|----|-------------|-------------|
| Tyrosine_metabolism                                       | 3.655333862 | GC | 2.309113353 | 0.184947669 |
| African_trypanosomiasis                                   | 2.216998403 | SG | 1.339037854 | 0.016992945 |
| Sesquiterpenoid_biosynthesis                              | 0.093445298 | SG | 0.418079381 | 0.070977333 |
| Transcription_factors                                     | 4.181611726 | GC | 2.778567635 | 0.047955756 |
| Phosphonate_and_phosphinate_metabolism                    | 2.779917089 | GC | 1.314773828 | 0.055830534 |
| Tuberculosis                                              | 3.156264502 | GC | 1.78963844  | 7.50142E-05 |
| Plant_pathogen_interaction                                | 3.174877879 | SG | 1.794486791 | 0.021803986 |
| Nitrogen_metabolism                                       | 3.867520271 | SG | 2.056185988 | 0.240723683 |
| Germination                                               | 1.688770203 | GC | 0.75397501  | 0.370211639 |
| Isoquinoline_alkaloid_biosynthesis                        | 2.689817528 | AG | 1.307386382 | 0.611394911 |
| Streptomycin_biosynthesis                                 | 3.405893852 | GC | 1.983154748 | 0.068294576 |
| RNA_transport                                             | 3.089056936 | GC | 1.955971706 | 0.049963512 |
| Pyrimidine_metabolism                                     | 4.234841902 | GC | 2.966246299 | 0.008554326 |
| Citrate_cycle__TCA_cycle__                                | 3.8553165   | SG | 2.488524658 | 0.006073785 |
| D_Glutamine_and_D_glutamate_metabolism                    | 3.159348297 | GC | 1.863331679 | 0.030905775 |
| Photosynthesis__antenna_proteins                          | 1.000592097 | GC | 0.549552042 | 0.006884302 |
| Sphingolipid_metabolism                                   | 2.996471052 | GC | 2.104789505 | 0.005915512 |
| PPAR_signaling_pathway                                    | 3.130737781 | AG | 1.74067942  | 0.87500402  |
| Long_term_depression                                      | 0           |    |             | -           |
| Phenylalanine_tyrosine_and_tryptophan_biosynthesis        | 3.882887431 | AG | 2.489494121 | 0.090978599 |
| VEGF_signaling_pathway                                    | 0           | GC | 0.651970406 | 0.296639211 |
| Glycan_biosynthesis_and_metabolism                        | 2.825993808 | SG | 1.962670394 | 0.003866328 |
| Phenylalanine_metabolism                                  | 3.47297394  | SG | 2.441904165 | 0.009173474 |
| Other_glycan_degradation                                  | 3.114645046 | GC | 2.225093588 | 0.018610732 |
| Vasopressin_regulated_water_reabsorption                  | 0.624088968 | GC | 0.340710519 | 0.878238455 |
| Progesterone_mediated_oocyte_maturation                   | 2.427815884 | SG | 1.417028106 | 0.136042356 |
| MAPK_signaling_pathway__yeast                             | 2.616456109 | SG | 1.518619796 | 0.163440664 |
| Retinol_metabolism                                        | 2.858823729 | GC | 1.529796561 | 0.380913399 |
| One_carbon_pool_by_folate                                 | 3.735847512 | GC | 2.321121226 | 0.00072088  |
| Valine_leucine_and_isoleucine_biosynthesis                | 3.820230691 | AG | 2.052041069 | 0.425914455 |
| Chaperones_and_folding_catalysts                          | 3.990602602 | AG | 2.067703253 | 0.2465279   |
| DNA_replication_proteins                                  | 4.03723184  | GC | 2.424973345 | 0.295397418 |
| Photosynthesis                                            | 3.544031656 | GC | 2.250845536 | 0.010654233 |
| Glycosphingolipid_biosynthesis__lacto_and_neolacto_series | 0           | AG | 1.038114684 | 0.337435189 |
| GTP_binding_proteins                                      | 0           | GC | 1.95836263  | 0.297371656 |
| Linoleic_acid_metabolism                                  | 2.822008925 | GC | 1.834872531 | 0.076443591 |
| Bacterial_secretion_system                                | 3.88799858  | SG | 2.593525764 | 0.003747569 |
| Leishmaniasis                                             | 0           | GC | 0.638336642 | 0.296639211 |
| Fatty_acid_biosynthesis                                   | 3.734362448 | GC | 2.251528987 | 0.077983882 |
| Drug_metabolism__other_enzymes                            | 3.449888964 | GC | 2.155770516 | 0.006595727 |
| Biosynthesis_of_type_II_polyketide_products               | 1.077415818 | AG | 0.702733426 | 0.261364997 |
| Oxidative_phosphorylation                                 | 4.105202445 | AG | 2.816462455 | 0.016423059 |
| Fatty_acid_elongation_in_mitochondria                     | 0.121123591 | AG | 0.507341134 | 0.381742781 |
| NOD_like_receptor_signaling_pathway                       | 2.464125229 | AG | 1.2724883   | 0.472987403 |
| Insulin_signaling_pathway                                 | 2.69885736  | GC | 1.45711148  | 0.085221184 |
| Ion_channels                                              | 2.615966528 | GC | 1.835305079 | 0.057563103 |
| Indole_alkaloid_biosynthesis                              | 1.046391476 | SG | 0.349840202 | 0.49491893  |
| Peptidoglycan_biosynthesis                                | 3.882626183 | GC | 2.671082565 | 0.000530203 |
| Glutathione_metabolism                                    | 3.60125535  | SG | 2.175812585 | 0.003709166 |
| Apoptosis                                                 | 2.201634049 | GC | 1.52177222  | 0.00547594  |

|                                                       |             |    |             |             |
|-------------------------------------------------------|-------------|----|-------------|-------------|
| X_Parkinson_s_disease_                                | 2.809583712 | SG | 2.054103074 | 0.000947004 |
| Salivary_secretion                                    | 0           | AG | 0.793693219 | 0.338741248 |
| Purine_metabolism                                     | 4.357279709 | GC | 3.01704351  | 0.014373427 |
| mRNA_surveillance_pathway                             | 0.455387029 | AG | 0.414758807 | 0.68146038  |
| Adipocytokine_signaling_pathway                       | 2.809374159 | AG | 1.564493648 | 0.64782425  |
| Fc_gamma_R_mediated_phagocytosis                      | 0.599436038 | GC | 0.2512504   | 0.184535315 |
| Glycolysis__Gluconeogenesis                           | 4.057881375 | GC | 2.891323894 | 0.000309616 |
| Pancreatic_cancer                                     | 0           |    |             | -           |
| Antigen_processing_and_presentation                   | 2.427815884 | SG | 1.417028106 | 0.136042356 |
| Prenyltransferases                                    | 3.511993464 | GC | 2.086304753 | 0.023524977 |
| Histidine_metabolism                                  | 3.692961864 | SG | 2.012898493 | 0.718208931 |
| Drug_metabolism__cytochrome_P450                      | 3.131456534 | SG | 1.933121586 | 0.107882939 |
| Hypertrophic_cardiomyopathy__HCM_                     | 1.366828356 | SG | 0.701079651 | 0.018117778 |
| Vitamin_B6_metabolism                                 | 3.25075284  | AG | 1.794696352 | 0.486439992 |
| C5_Branched_dibasic_acid_metabolism                   | 3.415585709 | GC | 1.754332038 | 0.353465359 |
| Complement_and_coagulation_cascades                   | 0           |    |             | -           |
| Long_term_potentiation                                | 0           |    |             | -           |
| Caffeine_metabolism                                   | 1.166063139 | SG | 0.36189721  | 0.639402712 |
| Oocyte_meiosis                                        | 0           |    |             | -           |
| Peroxisome                                            | 3.346790078 | AG | 2.130922166 | 0.259281103 |
| Systemic_lupus_erythematosus                          | 0.869123192 | AG | 0.291534289 | 0.255362277 |
| Ubiquinone_and_other_terpenoid_quinone_biosynthesis   | 3.522713268 | SG | 2.260692426 | 0.00172267  |
| Peptidases                                            | 4.205231305 | GC | 2.629318643 | 0.000333826 |
| Tight_junction                                        | 0           | AG | 0.22292014  | 0.592453473 |
| Glycosylphosphatidylinositol_GPI__anchor_biosynthesis | 0           | SG | 1.796065301 | 0.296518234 |
| Naphthalene_degradation                               | 3.383124135 | GC | 2.059988451 | 0.087823347 |
| Vascular_smooth_muscle_contraction                    | 0           |    |             | -           |
| Sulfur_relay_system                                   | 3.567306232 | SG | 2.122945359 | 0.010355961 |
| Protein_processing_in_endoplasmic_reticulum           | 2.664660395 | SG | 1.224212144 | 0.814066061 |
| Measles                                               | 0           |    |             | -           |
| Renal_cell_carcinoma                                  | 2.445565069 | SG | 0.946301624 | 0.760872179 |
| D_Alanine_metabolism                                  | 3.127532866 | GC | 2.12711805  | 0.007583738 |
| Small_cell_lung_cancer                                | 1.787428194 | AG | 0.981255627 | 0.664446854 |
| Rheumatoid_arthritis                                  | 0           |    |             | -           |
| Phototransduction__fly                                | 0           | AG | 0.223152946 | 0.592453473 |
| Butirosin_and_neomycin_biosynthesis                   | 2.735999941 | GC | 1.565225109 | 0.002706881 |
| Influenza_A                                           | 1.789133194 | AG | 0.988111089 | 0.645225005 |
| Nitrotoluene_degradation                              | 2.950227389 | AG | 1.962263464 | 0.332069135 |
| Pores_ion_channels                                    | 3.683451794 | SG | 2.653135168 | 0.000884126 |
| Mineral_absorption                                    | 2.052879737 | AG | 0.872862448 | 0.199923523 |
| Colorectal_cancer                                     | 1.785104268 | AG | 0.983535669 | 0.658495008 |
| Protein_digestion_and_absorption                      | 1.853228926 | AG | 0.801696506 | 0.628941587 |
| Pathways_in_cancer                                    | 2.77967827  | AG | 1.500224693 | 0.041027031 |
| Terpenoid_backbone_biosynthesis                       | 3.747894117 | GC | 2.365307978 | 0.014502851 |
| Amyotrophic_lateral_sclerosis__ALS_                   | 2.644224986 | SG | 1.708982193 | 0.000185109 |
| Primary_immunodeficiency                              | 2.704165855 | SG | 0.964112601 | 0.522987872 |
| RIG_I_like_receptor_signaling_pathway                 | 1.743290802 | GC | 1.000989471 | 0.043544346 |
| Neuroactive_ligand_receptor_interaction               | 0           | SG | 0.903185735 | 0.075557477 |
| Bladder_cancer                                        | 2.1139078   | SG | 1.38752149  | 0.001654269 |
| Nucleotide_excision_repair                            | 3.56398508  | GC | 2.167017268 | 0.062859382 |

|                                                             |             |    |             |             |
|-------------------------------------------------------------|-------------|----|-------------|-------------|
| Olfactory_transduction                                      | 0           |    |             | -           |
| Others                                                      | 4.003865213 | GC | 2.875284752 | 9.76106E-05 |
| Geraniol_degradation                                        | 3.442765596 | SG | 2.563622279 | 0.035132402 |
| N_Glycan_biosynthesis                                       | 2.300767782 | AG | 1.20819171  | 0.503822325 |
| ABC_transporters                                            | 4.53348587  | SG | 2.717478247 | 0.697004566 |
| Bacterial_motility_proteins                                 | 4.232253076 | SG | 3.369763233 | 0.001444925 |
| Lysine_biosynthesis                                         | 3.826162922 | GC | 2.395898821 | 0.001156304 |
| Type_II_diabetes_mellitus                                   | 2.61670772  | GC | 1.22666565  | 0.223937173 |
| Vibrio_cholerae_infection                                   | 1.346168478 | SG | 0.655852374 | 0.036912558 |
| Pertussis                                                   | 2.369509666 | SG | 1.331050816 | 0.285631981 |
| Other_ion_coupled_transporters                              | 4.116931588 | GC | 2.499694485 | 0.067328258 |
| X111_Trichloro_22_bis_4_chlorophenyl_ethane_DDT_degradation | 1.285762914 | SG | 0.508188888 | 0.063516232 |
| Neurotrophin_signaling_pathway                              | 0           |    |             | -           |
| alpha_Linolenic_acid_metabolism                             | 2.617841161 | SG | 1.838590971 | 1.66859E-05 |
| Fluorobenzoate_degradation                                  | 2.373668597 | AG | 1.369515079 | 0.440238883 |
| Sulfur_metabolism                                           | 3.473819031 | GC | 1.654489283 | 0.204037039 |
| Riboflavin_metabolism                                       | 3.429264805 | SG | 1.718862381 | 0.10443576  |
| Base_excision_repair                                        | 3.667201862 | GC | 2.019404741 | 0.244111008 |
| Phototransduction                                           | 0           |    |             | -           |
| Viral_myocarditis                                           | 1.787713642 | AG | 0.986165739 | 0.661150684 |
| Focal_adhesion                                              | 0           | AG | 0.565236109 | 0.635439421 |
| Cyanoamino_acid_metabolism                                  | 3.329621085 | AG | 1.444526727 | 0.504726409 |
| CAM_ligands                                                 | 0           | GC | 2.11491155  | 0.448216518 |
| Flagellar_assembly                                          | 3.91803541  | SG | 3.101633339 | 0.001129506 |
| Tropanepiperidine_and_pyridine_alkaloid_biosynthesis        | 2.999331723 | AG | 1.47650137  | 0.839321286 |
| GnRH_signaling_pathway                                      | 0.599436038 | GC | 0.252840718 | 0.181024137 |
| Pyruvate_metabolism                                         | 4.05880538  | GC | 2.355455462 | 0.134710757 |
| Carbon_fixation_in_photosynthetic_organisms                 | 3.704783662 | GC | 2.291776923 | 1.51052E-05 |
| Arginine_and_proline_metabolism                             | 4.089008474 | SG | 2.81705793  | 0.000111039 |
| Cell_cycle_Caulobacter                                      | 3.692665691 | GC | 2.111338968 | 0.008654601 |
| Chloroalkane_and_chloroalkene_degradation                   | 3.40060282  | GC | 2.051346599 | 0.199849604 |
| Hepatitis_C                                                 | 0           |    |             | -           |
| Leukocyte_transendothelial_migration                        | 0           | AG | 0.223152946 | 0.592453473 |
| Zeatin_biosynthesis                                         | 2.634667663 | GC | 1.383018761 | 0.01048744  |
| Betalain_biosynthesis                                       | 1.17138243  | SG | 0.436410282 | 0.481369394 |
| Metabolism_of_xenobiotics_by_cytochrome_P450                | 3.111865468 | SG | 1.91818238  | 0.082218465 |
| RNA_degradation                                             | 3.660558732 | AG | 1.709932777 | 0.747421841 |
| Calcium_signaling_pathway                                   | 0           | GC | 0.633286478 | 0.618589432 |
| Adherens_junction                                           | 0           | AG | 0.223152946 | 0.592453473 |
| Glycosaminoglycan_degradation                               | 2.420822568 | GC | 1.404794466 | 0.382901978 |
| TGF_beta_signaling_pathway                                  | 0           |    |             | -           |
| Dioxin_degradation                                          | 2.904953396 | GC | 1.701795135 | 0.318631801 |
| Regulation_of_actin_cytoskeleton                            | 0           | AG | 0.223152946 | 0.592453473 |
| Protein_folding_and_associated_processing                   | 3.924534567 | SG | 2.566238485 | 0.01609191  |
| Bisphenol_degradation                                       | 3.025038381 | GC | 1.744416067 | 0.152696808 |
| Sporulation                                                 | 3.203381213 | GC | 2.412411379 | 0.00081055  |
| Steroid_biosynthesis                                        | 1.891209282 | AG | 0.984390703 | 0.206450439 |
| Hematopoietic_cell_lineage                                  | 0.17611235  | GC | 0.355704711 | 0.785635222 |
| Melanogenesis                                               | 0.661677567 | SG | 0.347805309 | 0.405314496 |
| Steroid_hormone_biosynthesis                                | 2.114493747 | AG | 0.935280321 | 0.856964077 |

|                                                       |             |    |             |             |
|-------------------------------------------------------|-------------|----|-------------|-------------|
| Isoflavonoid_biosynthesis                             | 0.588585903 | AG | 0.359619028 | 0.635788512 |
| Arachidonic_acid_metabolism                           | 2.816101016 | SG | 1.76968805  | 0.000786193 |
| Inositol_phosphate_metabolism                         | 3.32888535  | SG | 2.321395885 | 0.003051809 |
| Carbohydrate_digestion_and_absorption                 | 2.251783442 | GC | 1.690179096 | 0.000874223 |
| Porphyrin_and_chlorophyll_metabolism                  | 3.952692848 | SG | 2.41669448  | 0.097248449 |
| Translation_factors                                   | 3.683076406 | GC | 2.367786772 | 0.001848717 |
| Selenocompound_metabolism                             | 3.587826464 | GC | 2.069294652 | 0.009963434 |
| Arrhythmogenic_right_ventricular_cardiomyopathy__ARVC | 0           | AG | 0.223152946 | 0.592453473 |
| Notch_signaling_pathway                               | 0.111479813 | SG | 0.326505859 | 0.053309772 |
| Carbohydrate_metabolism                               | 3.068129326 | GC | 2.013447513 | 0.012048524 |
| mTOR_signaling_pathway                                | 0           |    |             | -           |
| Bacterial_invasion_of_epithelial_cells                | 1.656459133 | GC | 1.118145    | 0.002206114 |
| Basal_transcription_factors                           | 1.457690595 | GC | 0.646159217 | 0.672457301 |
| Taurine_and_hypotaurine_metabolism                    | 3.2055418   | SG | 1.519446384 | 0.280721834 |
| p53_signaling_pathway                                 | 1.798995537 | AG | 0.98742924  | 0.683012912 |
| Tryptophan_metabolism                                 | 3.696617051 | SG | 2.717159262 | 0.001733867 |
| Flavonoid_biosynthesis                                | 1.991022514 | SG | 0.810904629 | 0.74051892  |
| Wnt_signaling_pathway                                 | 0.111479813 | SG | 0.32769618  | 0.053309772 |
| Aminoacyl_tRNA_biosynthesis                           | 4.073513091 | GC | 2.772064328 | 0.017736799 |
| Other_types_of_O_glycan_biosynthesis                  | 0           | SG | 1.849067066 | 0.525614084 |
| Nucleotide_metabolism                                 | 2.821403391 | GC | 1.850494515 | 0.198838409 |
| Two_component_system                                  | 4.296755411 | SG | 3.072522799 | 0.000602963 |
| Bile_secretion                                        | 0.868158957 | SG | 0.361777752 | 0.711345208 |
| Lipid_metabolism                                      | 3.047987344 | GC | 1.844786809 | 0.002031964 |
| Ribosome_biogenesis_in_eukaryotes                     | 2.787994555 | SG | 1.291044621 | 0.063760312 |
| Stilbenoid_diarylheptanoid_and_gingerol_biosynthesis  | 2.118847454 | AG | 0.985194826 | 0.541319515 |
| Pentose_and_glucuronate_interconversions              | 3.575360125 | GC | 1.963690368 | 0.113865055 |
| beta_Alanine_metabolism                               | 3.63955766  | SG | 2.696099604 | 0.002212267 |
| D_Arginine_and_D_ornithine_metabolism                 | 1.945591823 | GC | 1.19856594  | 0.001786566 |
| Propanoate_metabolism                                 | 3.958747936 | SG | 2.713041371 | 0.001520405 |
| Circadian_rhythm__plant                               | 1.553412899 | SG | 0.712041175 | 0.660127202 |
| Glutamatergic_synapse                                 | 2.953240572 | GC | 1.405584983 | 0.375472818 |
| Gastric_acid_secretion                                | 0           | AG | 0.793693219 | 0.338741248 |
| Fructose_and_mannose_metabolism                       | 3.912277962 | GC | 2.97082958  | 0.000150801 |
| Pathogenic_Escherichia_coli_infection                 | 0           | AG | 0.223152946 | 0.592453473 |
| Dilated_cardiomyopathy__DCM__                         | 0           | AG | 0.223152946 | 0.592453473 |
| Staphylococcus_aureus_infection                       | 2.904609462 | GC | 2.34574709  | 0.00442767  |
| Ascorbate_and_aldarate_metabolism                     | 3.085665085 | AG | 1.493285033 | 0.486820373 |
| Glycine_serine_and_threonine_metabolism               | 3.963001186 | SG | 2.492833236 | 0.003603375 |
| Cytosolic_DNA_sensing_pathway                         | 0           |    |             | -           |
| MAPK_signaling_pathway                                | 0           |    |             | -           |
| Transcription_machinery                               | 3.862957117 | AG | 1.783425177 | 0.846369613 |
| Polycyclic_aromatic_hydrocarbon_degradation           | 3.190528571 | GC | 1.88742066  | 0.069631294 |
| Styrene_degradation                                   | 2.936577131 | SG | 2.112445415 | 0.00033391  |
| Glyoxylate_and_dicarboxylate_metabolism               | 3.864890869 | SG | 2.905029672 | 0.000105129 |
| Biosynthesis_of_unsaturated_fatty_acids               | 3.347941402 | SG | 2.326808793 | 0.00825589  |
| Polyketide_sugar_unit_biosynthesis                    | 3.124537971 | GC | 1.738937133 | 0.257838066 |
| Prostate_cancer                                       | 2.428013925 | SG | 1.416504951 | 0.137595265 |
| Phosphatidylinositol_signaling_system                 | 3.048645195 | GC | 1.597232723 | 0.177776374 |
| Thiamine_metabolism                                   | 3.660600364 | GC | 2.377888928 | 0.040403482 |

|                                                            |             |    |             |             |
|------------------------------------------------------------|-------------|----|-------------|-------------|
| Epithelial_cell_signaling_in_Helicobacter_pylori_infection | 2.886085054 | AG | 1.796570244 | 0.32592829  |
| Novobiocin_biosynthesis                                    | 3.063758884 | AG | 1.497199893 | 0.102701163 |
| Glioma                                                     | 0           |    |             | -           |
| Glycosphingolipid_biosynthesis__ganglio_series             | 2.265252038 | GC | 1.400958044 | 0.167766115 |
| Transporters                                               | 4.795186229 | GC | 3.299399119 | 0.083329728 |
| Photosynthesis_proteins                                    | 3.562056155 | GC | 2.214263331 | 0.008844945 |
| Phenylpropanoid_biosynthesis                               | 2.902622848 | SG | 1.447732597 | 0.641759494 |
| Endocrine_and_other_factor_regulated_calcium_reabsorption  | 0           | AG | 0.793693219 | 0.338741248 |
| Bacterial_chemotaxis                                       | 3.799934829 | SG | 2.880283917 | 0.021095866 |
| Biosynthesis_of_vancomycin_group_antibiotics               | 2.644838268 | GC | 1.374717664 | 0.193729412 |
| Pentose_phosphate_pathway                                  | 3.890585346 | GC | 2.494724392 | 0.004490386 |
| DNA_repair_and_recombination_proteins                      | 4.433769465 | GC | 2.948427681 | 0.014068278 |
| Biosynthesis_of_siderophore_group_nonribosomal_peptides    | 2.711231584 | SG | 1.473469547 | 0.124355729 |
| Amoebiasis                                                 | 2.195565715 | AG | 1.339396591 | 0.133859594 |
| Aminobenzoate_degradation                                  | 3.46439492  | GC | 1.84817987  | 0.839602976 |
| RNA_polymerase                                             | 3.236896702 | GC | 2.145445483 | 0.003812898 |
| Caprolactam_degradation                                    | 3.300199586 | SG | 2.40144435  | 0.019678735 |
| beta_Lactam_resistance                                     | 2.498655459 | SG | 1.701057733 | 0.000553866 |
| Cellular_antigens                                          | 2.787676373 | SG | 1.601124975 | 0.031459264 |
| Chromosome                                                 | 4.151424023 | GC | 2.360347233 | 0.239684414 |
| Atrazine_degradation                                       | 2.826157947 | AG | 1.868379524 | 0.008420346 |

LDA: Linear discriminant analysis

KEGG: Kyoto Encyclopedia of genes and Genomes

SG: Superficial gastritis

AG: Atrophic gastritis

GC: Gastric cancer
