# Supplementary material for: Mucosal microbiome dysbiosis in gastric carcinogenesis
Source: PubMed Central journal article supplement — Gut. 2017 Aug 1;67(6):1024–32. doi: 10.1136/gutjnl-2017-314281 (PMC5969346; doi:10.1136/gutjnl-2017-314281), 2017-08-01
Supplement: gutjnl-2017-314281supp024.pdf [file gutjnl-2017-314281supp024.pdf]

**Supplementary table 24: Nearest sequence taxon index (NSTI) scores for Inner Mongolia cohort**

| Sample_ID  | Diagnosis | Metric        | NSTI_scores |
|------------|-----------|---------------|-------------|
| 10GC.v4    | AG        | Weighted NSTI | 0.059099543 |
| 10GN.v4    | AG        | Weighted NSTI | 0.060529028 |
| 11GC.v4    | AG        | Weighted NSTI | 0.028183092 |
| 11GN.v4    | AG        | Weighted NSTI | 0.017362245 |
| 124AG38.v4 | AG        | Weighted NSTI | 0.043225646 |
| 12GC.v4    | AG        | Weighted NSTI | 0.077486157 |
| 13GC.v4    | AG        | Weighted NSTI | 0.040915358 |
| 13GN.v4    | AG        | Weighted NSTI | 0.044009266 |
| 14GC.v4    | AG        | Weighted NSTI | 0.031865501 |
| 14GN.v4    | AG        | Weighted NSTI | 0.048723035 |
| 16GC.v4    | AG        | Weighted NSTI | 0.061106326 |
| 16GN.v4    | AG        | Weighted NSTI | 0.06417813  |
| 19GC212.v4 | AG        | Weighted NSTI | 0.099460078 |
| 19GN.v4    | AG        | Weighted NSTI | 0.081847887 |
| 1GC.v4     | AG        | Weighted NSTI | 0.029094053 |
| 1GN.v4     | AG        | Weighted NSTI | 0.021010902 |
| 20GC.v4    | AG        | Weighted NSTI | 0.111270414 |
| 20GC2.v4   | AG        | Weighted NSTI | 0.060455757 |
| 21GC.v4    | AG        | Weighted NSTI | 0.08091271  |
| 21GN.v4    | AG        | Weighted NSTI | 0.073712217 |
| 22GC.v4    | AG        | Weighted NSTI | 0.042047568 |
| 22GN.v4    | AG        | Weighted NSTI | 0.033458929 |
| 23GC.v4    | AG        | Weighted NSTI | 0.07242635  |
| 24GC.v4    | AG        | Weighted NSTI | 0.024441368 |
| 24GN.v4    | AG        | Weighted NSTI | 0.081095989 |
| 25GC.v4    | AG        | Weighted NSTI | 0.110063479 |
| 25GN.v4    | AG        | Weighted NSTI | 0.036553851 |
| 26GC.v4    | AG        | Weighted NSTI | 0.095877001 |
| 26GN.v4    | AG        | Weighted NSTI | 0.051333026 |
| 27GC.v4    | AG        | Weighted NSTI | 0.062437065 |
| 27GN.v4    | AG        | Weighted NSTI | 0.060610988 |
| 28GC.v4    | AG        | Weighted NSTI | 0.028802032 |
| 28GN.v4    | AG        | Weighted NSTI | 0.018102293 |
| 29GC.v4    | AG        | Weighted NSTI | 0.101642831 |
| 29GN.v4    | AG        | Weighted NSTI | 0.120905698 |
| 2GC.v4     | AG        | Weighted NSTI | 0.024237682 |
| 2GN.v4     | AG        | Weighted NSTI | 0.021558513 |
| 30GC.v4    | AG        | Weighted NSTI | 0.039002422 |
| 30GN.v4    | AG        | Weighted NSTI | 0.036995445 |
| 32GC.v4    | AG        | Weighted NSTI | 0.086945533 |
| 32GN.v4    | AG        | Weighted NSTI | 0.08091365  |
| 33GC.v4    | AG        | Weighted NSTI | 0.047788887 |
| 33GN.v4    | AG        | Weighted NSTI | 0.050480311 |
| 34GC.v4    | AG        | Weighted NSTI | 0.038125526 |

|           |    |               |             |
|-----------|----|---------------|-------------|
| 34GN.v4   | AG | Weighted NSTI | 0.032321827 |
| 3GC.v4    | AG | Weighted NSTI | 0.026837276 |
| 3GN.v4    | AG | Weighted NSTI | 0.041822685 |
| 4GC.v4    | AG | Weighted NSTI | 0.034551436 |
| 4GN.v4    | AG | Weighted NSTI | 0.033481467 |
| 5GC.v4    | AG | Weighted NSTI | 0.022617099 |
| 5GN.v4    | AG | Weighted NSTI | 0.039849044 |
| 6GC.v4    | GC | Weighted NSTI | 0.033439534 |
| 6GN.v4    | GC | Weighted NSTI | 0.041734265 |
| 7GC.v4    | GC | Weighted NSTI | 0.040856477 |
| 7GN.v4    | GC | Weighted NSTI | 0.015514712 |
| 8GC.v4    | GC | Weighted NSTI | 0.027940376 |
| 8GN.v4    | GC | Weighted NSTI | 0.043340461 |
| AG1.v4    | GC | Weighted NSTI | 0.028310035 |
| AG10.v4   | GC | Weighted NSTI | 0.039382632 |
| AG11.v4   | GC | Weighted NSTI | 0.01925097  |
| AG12.v4   | GC | Weighted NSTI | 0.043348028 |
| AG13.v4   | GC | Weighted NSTI | 0.029004368 |
| AG14.v4   | GC | Weighted NSTI | 0.026070543 |
| AG15.v4   | GC | Weighted NSTI | 0.044194016 |
| AG16.v4   | GC | Weighted NSTI | 0.026490164 |
| AG17.v4   | GC | Weighted NSTI | 0.035582114 |
| AG18.v4   | GC | Weighted NSTI | 0.048254531 |
| AG19.v4   | GC | Weighted NSTI | 0.02649461  |
| AG2.v4    | GC | Weighted NSTI | 0.046901492 |
| AG20.v4   | GC | Weighted NSTI | 0.028950988 |
| AG50.v4   | SG | Weighted NSTI | 0.027866248 |
| AG50X.v4  | SG | Weighted NSTI | 0.061419727 |
| AG51.v4   | SG | Weighted NSTI | 0.132035229 |
| AG52.v4   | SG | Weighted NSTI | 0.048545704 |
| AG52X.v4  | SG | Weighted NSTI | 0.065954174 |
| AG53.v4   | SG | Weighted NSTI | 0.018108356 |
| AG6.v4    | SG | Weighted NSTI | 0.086092831 |
| AG7.v4    | SG | Weighted NSTI | 0.027554458 |
| AG8.v4    | SG | Weighted NSTI | 0.027090811 |
| AG9.v4    | SG | Weighted NSTI | 0.046830123 |
| NAG_30.v4 | SG | Weighted NSTI | 0.098464165 |
| NAG_32.v4 | SG | Weighted NSTI | 0.112708434 |
| NAG_34.v4 | SG | Weighted NSTI | 0.08300954  |
| NAG1.v4   | SG | Weighted NSTI | 0.058501132 |
| NAG10.v4  | SG | Weighted NSTI | 0.040664107 |
| NAG11.v4  | SG | Weighted NSTI | 0.040885922 |
| NAG12.v4  | SG | Weighted NSTI | 0.049315079 |
| NAG13.v4  | SG | Weighted NSTI | 0.04963441  |
| NAG15.v4  | SG | Weighted NSTI | 0.052998452 |
| NAG16.v4  | SG | Weighted NSTI | 0.03966698  |

|             |    |               |             |
|-------------|----|---------------|-------------|
| NAG18.v4    | SG | Weighted NSTI | 0.036312643 |
| NAG19.v4    | SG | Weighted NSTI | 0.055832029 |
| NAG2.v4     | SG | Weighted NSTI | 0.024165184 |
| NAG20.v4    | SG | Weighted NSTI | 0.022912508 |
| NAG21.v4    | SG | Weighted NSTI | 0.029810279 |
| NAG23.v4    | SG | Weighted NSTI | 0.082249487 |
| NAG24.v4    | SG | Weighted NSTI | 0.050395927 |
| NAG25.v4    | SG | Weighted NSTI | 0.041678526 |
| NAG26.v4    | SG | Weighted NSTI | 0.05296558  |
| NAG27.v4    | SG | Weighted NSTI | 0.032318471 |
| NAG28.v4    | SG | Weighted NSTI | 0.042855119 |
| NAG29260.v4 | SG | Weighted NSTI | 0.067218319 |
| NAG3.v4     | SG | Weighted NSTI | 0.059041953 |
| NAG33.v4    | SG | Weighted NSTI | 0.041683675 |
| NAG35.v4    | SG | Weighted NSTI | 0.05044783  |
| NAG37.v4    | SG | Weighted NSTI | 0.083043178 |
| NAG38.v4    | SG | Weighted NSTI | 0.063316848 |
| NAG39.v4    | SG | Weighted NSTI | 0.06475878  |
| NAG4.v4     | SG | Weighted NSTI | 0.04485929  |
| NAG40.v4    | SG | Weighted NSTI | 0.084514278 |
| NAG41.v4    | SG | Weighted NSTI | 0.077209644 |
| NAG43.v4    | SG | Weighted NSTI | 0.075372767 |
| NAG44.v4    | SG | Weighted NSTI | 0.06731697  |
| NAG45.v4    | SG | Weighted NSTI | 0.055644479 |
| NAG46.v4    | SG | Weighted NSTI | 0.056547852 |
| NAG47.v4    | SG | Weighted NSTI | 0.086012455 |
| NAG48131.v4 | SG | Weighted NSTI | 0.120962204 |
| NAG49.v4    | SG | Weighted NSTI | 0.037033302 |
| NAG5.v4     | SG | Weighted NSTI | 0.053414551 |
| NAG50.v4    | SG | Weighted NSTI | 0.039525716 |
| NAG51.v4    | SG | Weighted NSTI | 0.033766248 |
| NAG53.v4    | SG | Weighted NSTI | 0.080059191 |
| NAG6.v4     | SG | Weighted NSTI | 0.034175579 |
| NAG7.v4     | SG | Weighted NSTI | 0.07998112  |
| NAG8.v4     | SG | Weighted NSTI | 0.033532699 |
| NAG9.v4     | SG | Weighted NSTI | 0.068478756 |

SG: Superficial gastritis

AG: Atrophic gastritis

GC: Gastric cancer
