# Supplementary material for: Mucosal microbiome dysbiosis in gastric carcinogenesis
Source: PubMed Central journal article supplement — Gut. 2017 Aug 1;67(6):1024–32. doi: 10.1136/gutjnl-2017-314281 (PMC5969346; doi:10.1136/gutjnl-2017-314281), 2017-08-01
Supplement: gutjnl-2017-314281supp025.pdf [file gutjnl-2017-314281supp025.pdf]

## Supplementary figure 1

### The abundance of gastric cancer –enriched and –depleted operational taxonomic units (OTUs) across stages of gastric cancer

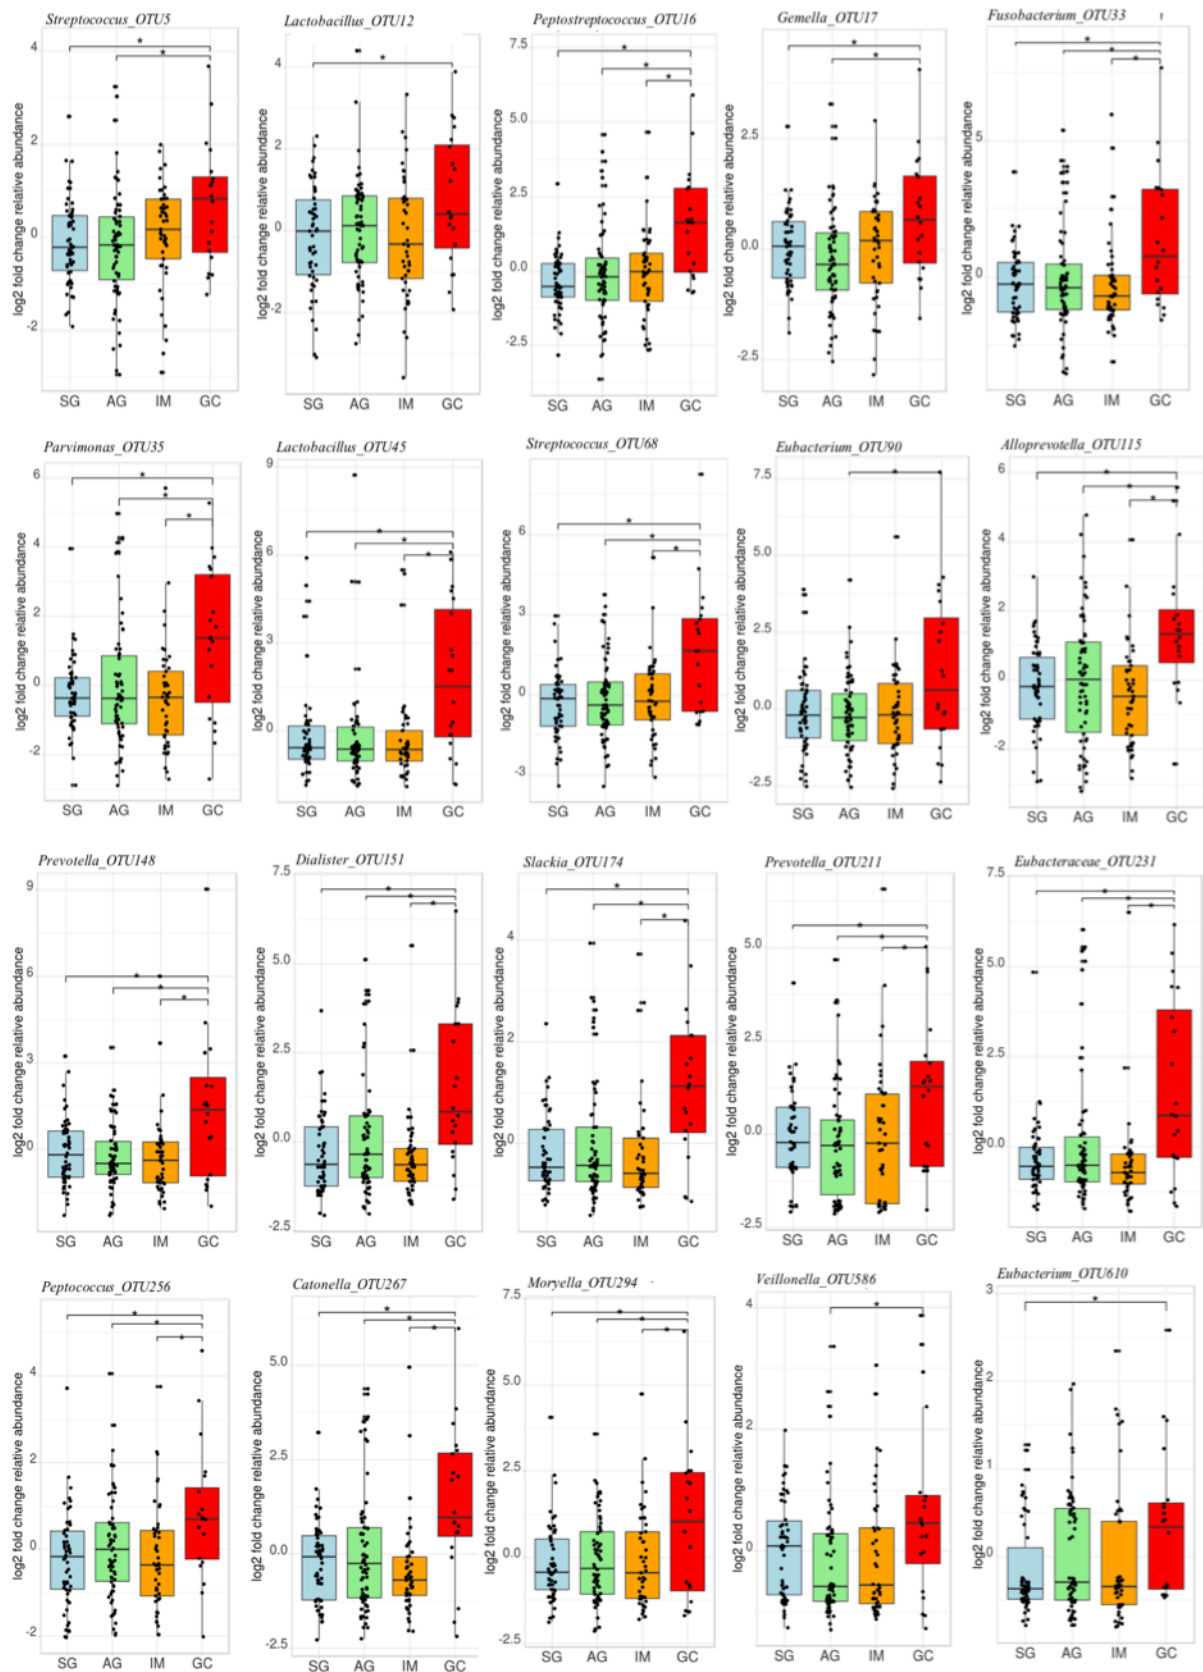

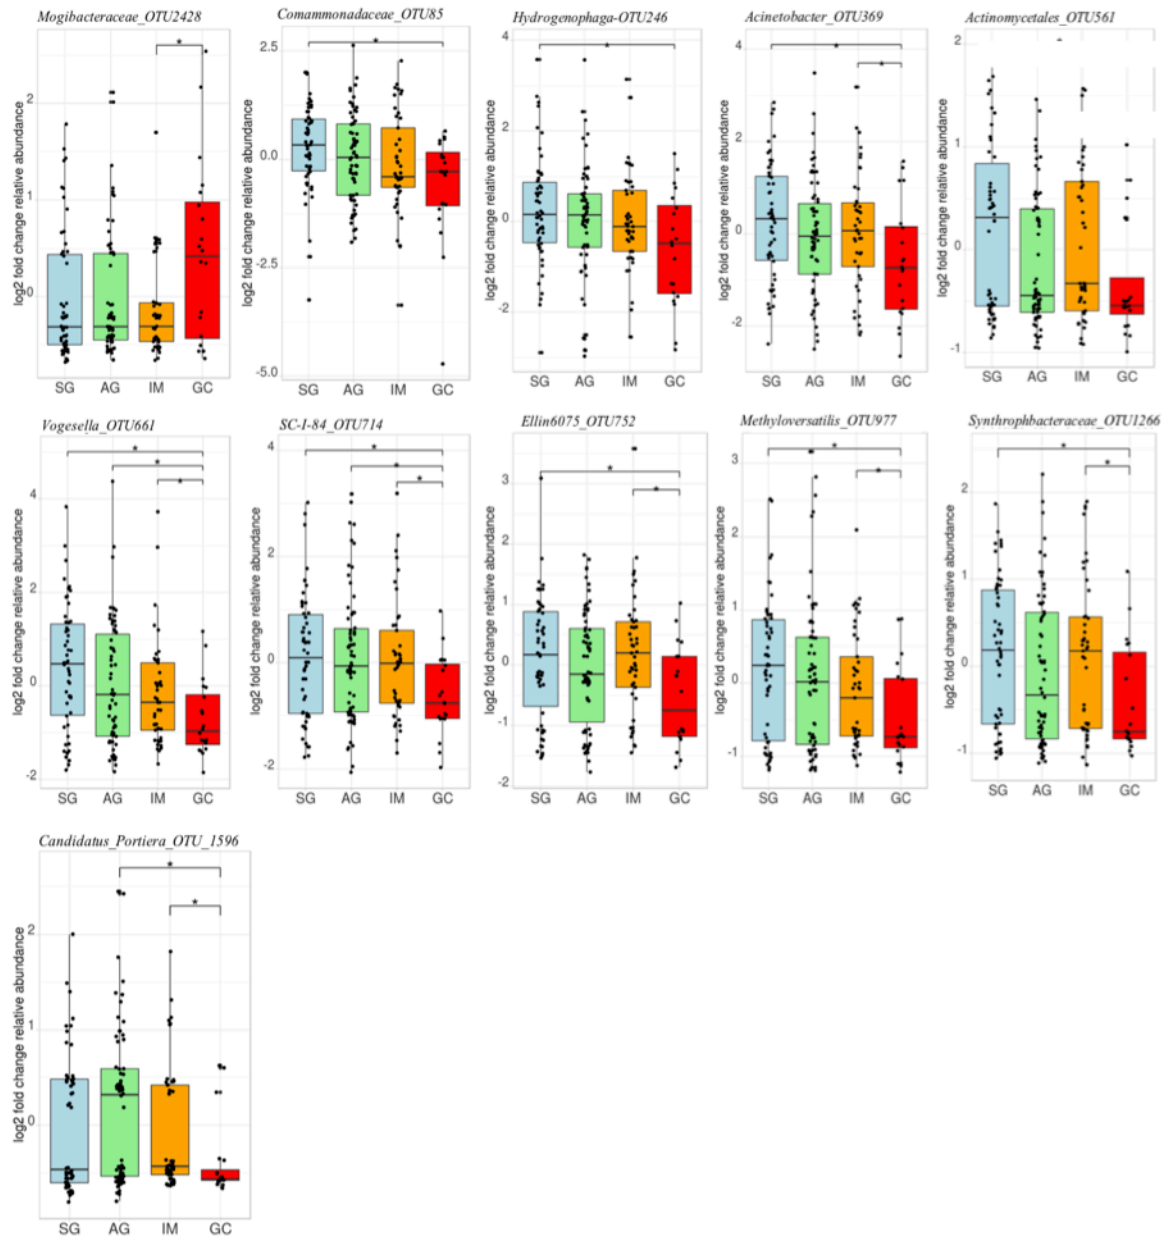

SG: Superficial gastritis  
 AG: Atrophic gastritis  
 IM: Intestinal metaplasia  
 GC: Gastric cancer
